# Supplementary material for: Association between socioeconomic status and self-reported diabetes in India: a cross-sectional multilevel analysis
Source: PubMed Central journal article supplement — BMJ Open. 2012 Jul 18;2(4):e000895. doi: 10.1136/bmjopen-2012-000895 (PMC3401832; doi:10.1136/bmjopen-2012-000895), 2012-07-18
Supplement: bmjopen-2012-000895.draft_revisions.pdf [file bmjopen-2012-000895.draft_revisions.pdf]

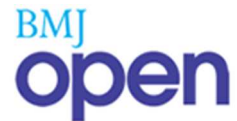

**Association between socioeconomic status and diabetes in India**

|                                 |                                                                                                                                  |
|---------------------------------|----------------------------------------------------------------------------------------------------------------------------------|
| Journal:                        | <i>BMJ Open</i>                                                                                                                  |
| Manuscript ID:                  | bmjopen-2012-000895                                                                                                              |
| Article Type:                   | Research                                                                                                                         |
| Date Submitted by the Author:   | 18-Jan-2012                                                                                                                      |
| Complete List of Authors:       | Corsi, Daniel J; McMaster University, Population Health Research Institute<br>Subramanian, S V; Harvard School of Public Health, |
| <b>Primary Subject Heading</b>: | Epidemiology                                                                                                                     |
| Secondary Subject Heading:      | Diabetes and endocrinology                                                                                                       |
| Keywords:                       | Socioeconomic factors, India, Noncommunicable disease, Diabetes, Geography                                                       |
|                                 |                                                                                                                                  |

SCHOLARONE™  
Manuscripts

Peer review only

1  
2  
3 **Title** Association between socioeconomic status and diabetes in India: a cross-sectional  
4  
5 multilevel analysis  
6  
7

8 **Authors and affiliation**  
9

10 Daniel J Corsi, MSc, Population Health Research Institute, McMaster University,  
11  
12 Hamilton, ON, Canada  
13

14 SV Subramanian, PhD, Professor of Population Health and Geography,  
15  
16 Department of Society, Human Development, and Health, Harvard School of Public  
17  
18 Health, Boston, MA, USA  
19  
20  
21

22 **Corresponding author details**  
23

24 Professor S V Subramanian, Harvard School of Public Health, 677 Huntington Avenue,  
25  
26 Boston MA 02115, USA; Tel: 617-432-6299; Fax: 617-432-3123; Email:  
27  
28

29 [svsubram@hsph.harvard.edu](mailto:svsubram@hsph.harvard.edu)  
30  
31

32 **Running head** Socioeconomic status and diabetes in India  
33

34 **Word count:** 3,340  
35

36 **Funding Statement** This research received no specific grant from any funding agency in  
37  
38 the public, commercial or not-for-profit sectors  
39  
40

41 **Conflict of Interest:** Authors declare no conflict of interest.  
42  
43  
44  
45  
46  
47  
48  
49  
50  
51  
52  
53  
54  
55  
56  
57  
58  
59  
60

**ABSTRACT**

**Objectives** To quantify the association between socioeconomic status (SES) and type-2 diabetes in India

**Design** Nationally representative cross-sectional household survey

**Setting** Urban and rural areas across 29 states in India

**Participants** 168,135 survey respondents aged 18-49 y (women) and 18-54 y (men)

**Primary outcome measure** Self-reported diabetes status

**Results** Markers of SES were social caste, education, and household wealth. The overall prevalence of diabetes was 1.5%; this increased to 1.9% and 2.5% for those with the highest levels of education and household wealth, respectively. In adjusted multilevel logistic regression models, education (odds ratio 1.87 for higher education *vs* no education) and household wealth (odds ratio 4.04 for richest quintile *vs* poorest) were related to diabetes ( $P < 0.0001$ ). In a fully adjusted model including all socioeconomic variables and body mass index (BMI), the odds ratio for diabetes was 2.58 (95% credible interval [CI]: 1.99, 3.40) for the richest quintile of household wealth versus the poorest.

**Conclusions** We found that the highest socioeconomic status groups in India appear to be at greatest risk for type-2 diabetes. This raises important policy implications for addressing the disease burdens among the poor versus those among the non poor in the context of India, where nearly half of the population is living in poverty.

## ARTICLE SUMMARY

### Article Focus

- The relationship between socioeconomic factors and type-2 diabetes has not been previously studied for the whole of India
- Our objective was to investigate associations between measures of socioeconomic status (defined as social caste, education, household wealth) and self-reported diabetes status in India
- In addition we explored geographic variation in diabetes between states and local areas in India

### Key messages

- The highest socioeconomic groups appear to be at greatest risk for diabetes in India
- In addition, there is substantial geographic heterogeneity in the prevalence of diabetes
- These findings raise important policy implications for in addressing the disease burdens among the poor versus those among the non poor in the context of India, where nearly half of the population is living in poverty.

### Strengths and Limitations

- The key strength of this study is the use of a large, nationally-representative survey to assess the socioeconomic and geographic patterning of diabetes across all of India. Limitations include the relatively younger age of the sample and assessment of diabetes status on the basis of self-reports.

## INTRODUCTION

The prevalence of type-2 diabetes in India has been investigated in numerous population based surveys conducted across a range of settings since the 1970s.[1-6] Despite multiple prevalence studies, few studies have considered the association between socioeconomic status (SES) and type-2 diabetes in India. Recently, it has been suggested that “poor people are disproportionately affected” by diabetes and other non-communicable diseases in low and middle income countries [7], although the empirical evidence in the Indian context remains limited. Studies among populations from a few geographic regions in India have provided some evidence of a positive SES-diabetes association [6 8-9]; however the strength and consistency of this association across the whole of India remains uncertain.

Type-2 diabetes is the most common form of diabetes globally, accounting for greater than 85% of cases.[10] The incidence of type-2 diabetes is related to genetic and non-genetic components, with the latter being greatly influenced by modifiable risk factors such as obesity, diets low in fibre and high in trans fat, and physical inactivity.[11-12] These lifestyle behaviours themselves are strongly patterned by SES [13], and may be mediators on the causal pathway between SES and the onset of type-2 diabetes.[14] In high income countries, the SES-diabetes relationship appears to be negative, with the poor at greatest risk. For example, strong associations have been observed between poverty, low education and type-2 diabetes among African American women [15-16], and among White women and men in the United States.[17] Similarly, a study from Canada described an inversely graded SES-diabetes association with an odds ratio of 1.9 for men (95% CI: 1.6-2.4) and 2.8 (95% CI: 2.2-3.4) for women for the

1  
2  
3 lowest versus highest income groups.[18] A recent meta-analysis of 23 epidemiological  
4 studies and 43 measures of SES-diabetes association revealed an overall increased risk  
5  
6 for type-2 diabetes for low SES groups based on education, occupation, and income.[19]  
7  
8  
9  
10 The strength of the association, however, was less consistent in low and middle income  
11 countries (LMICs), and few studies have been conducted in these countries.  
12

13  
14  
15 Concern has been raised over the anticipated rapid increase in type-2 diabetes  
16 prevalence in India.[20-21] Evidence on the secular increases in diabetes prevalence in  
17 India, however, have been limited to urban areas of Southern India[4 22-23], and have  
18 focused on the mean rates of diabetes rather than how it is distributed in the population.  
19  
20 In this paper we investigate the SES-diabetes relation in India using a large-scale  
21 nationally representative survey. In addition, we investigate the geographical distribution  
22 of diabetes at the state and local area levels in India.  
23  
24  
25  
26  
27  
28  
29  
30  
31  
32  
33

## 34 **METHODS**

### 35 **Data source**

36  
37 We use data from the 3<sup>rd</sup> National Family Health Survey (NFHS), conducted in 29  
38 states in India between November 2005 and August 2006.[24] NFHS-3 is a major  
39 national health survey in India which collected information on a range of indicators  
40 including reproductive health, nutritional status of adults and children, utilization of  
41 health care services, and blood testing for HIV prevalence. NFHS-3 covered all states in  
42 India, which comprise nearly 99% of the population, but excluded Union Territories. The  
43 survey was designed to provide estimates of key indicators (except HIV prevalence) for  
44 each state by urban and rural areas.  
45  
46  
47  
48  
49  
50  
51  
52  
53  
54  
55  
56  
57  
58  
59  
60

## Survey design

A uniform multistage sampling strategy was adopted in all states, with separate sampling in urban and rural areas.[25-26] In rural areas, a two stage sample was carried out using a list of villages from the 2001 census as the sampling frame. In the first stage, a stratified sample of villages was drawn with probability proportional to the size of the village. In the second stage, a random selection of households was drawn in each village from a complete list of households compiled during field visits carried out in each sampled village. In urban areas, a similar procedure was implemented beginning with a stratified random sample of municipal wards based on the 2001 census. Next, one census enumeration block (150-200 households) was selected from within wards using probability proportional to size. Finally, as in rural areas, field enumerators undertook a household listing operation in selected blocks and a random sample of households was made. In both rural and urban areas, 30 households were targeted for selection in each of the sampled units. The overall household response rate for NFHS-3 was 98%.[24]

All ever-married and never-married women aged 15-49 in selected households were invited to participate in the survey. In 22 states, men aged 15-54 in a subsample of households were eligible for the men's survey. In the remaining seven states (Andhra Pradesh, Karnataka, Maharashtra, Manipur, Tamil Nadu, Uttar Pradesh, and Nagaland) all men were invited to participate. The additional men recruited in these states was for the purpose of HIV testing to provide reliable state level estimates of HIV prevalence in certain states. Interviews were conducted in 1 of the 18 Indian languages in the respondent's home and the response rates were 95% for women and 87% for men.[24] During interviews, the weights and heights of survey respondents were measured by

1  
2  
3 trained field technicians using standardized measuring equipment designed for survey  
4  
5 settings.[27]  
6  
7

8 In total NFHS-3 collected information from 109,041 households, 124,385 women  
9  
10 age 15-49, and 74,369 men age 15-54.[24] We restricted our analyses adults 18 years  
11  
12 and older and non-pregnant women (n=171,207). Respondents who did not report or  
13  
14 know their diabetes status (n= 2,385) or with incomplete information for any of the  
15  
16 independent variables considered in the analysis (marital status, religion, caste, education,  
17  
18 household wealth) were excluded (n=687). Analyses were conducted on a sample of  
19  
20 168,135 respondents, (65,255 men and 102,880 women). Additional analyses  
21  
22 considering body mass index (BMI) were restricted to a sample of 158,936 due to  
23  
24 missing and/or implausible values for height and/or weight.  
25  
26  
27  
28

### 29 **Outcome and independent variables**

30  
31 The primary outcome was diabetes, assessed on the basis of self-reports by survey  
32  
33 respondents. Socioeconomic status was measured by social caste, education, and  
34  
35 household wealth. Social caste was reported by the household head. The categories were  
36  
37 Other Caste, Scheduled caste, Scheduled tribe, Other Backward Class, and No Caste.  
38  
39 Other Caste is a heterogeneous group that is traditionally viewed as having higher social  
40  
41 status. Scheduled castes and scheduled tribes are considered lower, socially  
42  
43 marginalized groups in India.[28] Education was specified as no education, primary,  
44  
45 secondary, or higher education. Household wealth was defined by an index based on  
46  
47 indicators of asset ownership and housing characteristics.[29] This index has been  
48  
49 developed and validated in a number of countries to be a robust measure of wealth and  
50  
51 has been found to be consistent with measures of income and expenditure.[30] Briefly,  
52  
53  
54  
55  
56  
57  
58  
59  
60



1  
2  
3 the measure was constructed as follows. Information on 33 indicators of housing  
4 characteristics (e.g., type of windows and flooring, water and sanitation facilities) and  
5 assets (e.g., ownership of home, car, computer, mobile phone) were weighted and  
6 combined with weights derived from a principal component analysis procedure.[24] The  
7 resulting variable was standardized to a mean of 0 and standard deviation of 1 and using  
8 this index the household population was divided into fifths from poorest to richest.  
9

10  
11 Control variables included age, gender, religion, place of residence, and BMI.  
12 Age was defined in 10 year categories and centred about its mean (32 years) in regression  
13 models. Gender was based on self-report. Religion was categorized as Hindu, Muslim,  
14 Sikh, Buddhist, or other religion. Marital status was defined as single, married, widowed,  
15 or separated. Place of residence (rural or urban) was defined according to the 2001  
16 Census. BMI (in  $\text{kg}/\text{m}^2$ ; weight in kilograms divided by the square of height in meters)  
17 was calculated for all survey respondents with valid measurements for weight and height.  
18 BMI was classified according to the following categories based on risk of type 2 diabetes  
19 and cardiovascular disease in Asian populations; less than  $18.5 \text{ kg}/\text{m}^2$  (underweight);  
20  $18.5\text{-}23 \text{ kg}/\text{m}^2$  (acceptable risk);  $23\text{-}27.5 \text{ kg}/\text{m}^2$  (increased risk); and  $27.5 \text{ kg}/\text{m}^2$  or greater  
21 (high risk).[31]  
22  
23

### 24 Analysis

25 To account for the complex survey design, we employed multilevel logistic  
26 regression to model the probability of diabetes.[32] A three-level model was specified  
27 with a binary response ( $y$ , diabetes or not) for individual  $i$  in local area (village or census  
28 block primary sampling units)  $j$  in state  $k$ . The outcome diabetes,  $\text{Pr}(y_{ijk} = 1)$ , was  
29 assumed to be binomially distributed  $y_{ijk} \sim \text{Binomial}(1, \pi_{ijk})$  with probability  $\pi_{ijk}$  related  
30  
31  
32  
33  
34  
35  
36  
37  
38  
39  
40  
41  
42  
43  
44  
45  
46  
47  
48  
49  
50  
51  
52  
53  
54  
55  
56  
57  
58  
59  
60

1  
2  
3 to the set of independent variables  $X$  and a random effect for each level by a logit link  
4  
5 function:

$$6 \quad \text{Logit}(\pi_{ijk}) = \beta_0 + \beta X + u_{0jk} + v_{0k} .$$

7  
8  
9  
10 The right hand side of the equation consists of the fixed part linear predictor ( $\beta_0 + \beta X$ )  
11  
12 and random intercepts attributable to local areas ( $u_{0jk}$ ) and states ( $v_{0k}$ ). The intercept,  
13  
14  $\beta_0$  represents the log odds of diabetes in the reference group, and the  $\beta$ -coefficients  
15  
16 represent the differential in the log odds of diabetes compared to the reference group  
17  
18 defined for each independent variable. Coefficients were exponentiated and presented as  
19  
20 odds ratios for interpretation. The random intercepts are assumed to be independently  
21  
22 and identically distributed and have variances estimated for local areas ( $\sigma_u^2$ ) and states  
23  
24 ( $\sigma_v^2$ ).[33] The variance parameters quantify heterogeneity in the log odds of diabetes at  
25  
26 each level, after taking into account individual characteristics and place of residence in  
27  
28 the fixed part. We expressed the variances at each level as a percentage of their  
29  
30 contribution to the total variance from an initial model adjusting for age and gender only  
31  
32 and from a final model accounting for all covariates. Models were estimated via Markov  
33  
34 Chain Monte Carlo (MCMC) simulation using the statistical software *MLwiN*. [34-35]  
35  
36  
37  
38  
39  
40  
41  
42  
43  
44  
45

## 46 RESULTS

47  
48 Characteristics of survey respondents by their self-reported diabetes status are  
49  
50 given in **Table 1**. The overall prevalence of diabetes in this sample was 1.5% and this  
51  
52 was higher in urban areas and among men (diabetes prevalence 2.0 % in urban v 1.0% in  
53  
54 rural; 1.8% in men v 1.3% in women). Diabetes prevalence increased with age (7.5% in  
55  
56  
57  
58  
59  
60

1  
2  
3 50-54y v 0.3% in 18-29y), education (1.9% in higher v 1.0% in no education), household  
4  
5  
6 wealth (2.5% in richest v 0.4% in poorest), and BMI (4.8% in 27.5+ kg/m<sup>2</sup> v 0.6% in  
7  
8 <18.5 kg/m<sup>2</sup>). At the state level, the prevalence of diabetes varied between 0.3% in  
9  
10 Rajasthan and 3.3% in Kerala and was generally higher in Southern and Eastern states  
11  
12  
13 **(Figure 1)**.

14  
15 In separate models that adjusted for age, marital status, religion, and place of  
16  
17 residence, statistically significant associations were observed between SES and diabetes  
18  
19 for each of the primary indicators of SES in this study: social caste, education, and  
20  
21 household wealth. Compared to the other caste group, scheduled casts, scheduled tribes,  
22  
23 and other backward classes had reduced odds of having diabetes with odds ratios of 0.81  
24  
25 (95% CI: 0.71, 0.94), 0.57 (95% CI: 0.46, 0.70), and 0.84 (95% CI: 0.75, 0.94),  
26  
27 respectively (**Table 2**). Education showed a graded relation with diabetes and an odds  
28  
29 ratio of 1.87 (95% CI: 1.61, 2.18) for those with higher education versus those with no  
30  
31 education. Household wealth showed a graded association with diabetes with individuals  
32  
33 from the richest households having an odds ratio for diabetes of 4.04 (95% CI: 3.08,  
34  
35 5.30) compared to those from the poorest households.

36  
37  
38  
39  
40  
41 The effects of caste and education were attenuated in the mutually adjusted  
42  
43 model. The reduced odds for diabetes remained consistent for scheduled tribes versus  
44  
45 other caste groups (OR 0.72, 95% CI: 0.58, 0.90) as did an increased odds for those with  
46  
47 secondary education versus no education (OR 1.18, 95% CI: 1.04, 1.35), however the  
48  
49 graded relation with education was less consistent. The strong and graded relation  
50  
51 between household wealth and diabetes remained consistent in this model with an odds  
52  
53 ratio for diabetes of 3.65 (95% CI: 2.83, 4.78) for the richest versus the poorest groups.  
54  
55  
56  
57  
58  
59  
60

1  
2  
3 Type-2 diabetes is strongly influenced by body weight.[36-38] Therefore, BMI was  
4  
5 added to the final model to control for potential confounding of the SES-diabetes  
6  
7 relationship in this sample. The odds ratios for caste and education remained consistent  
8  
9 between the mutually adjusted model and final model which included BMI. The odds  
10  
11 ratios for household wealth were further attenuated in the final model, however the  
12  
13 positive graded association remained statistically significant with an adjusted odds ratio  
14  
15 for those in the richest compared to the poorest households of 2.58 (95% CI: 1.99, 3.40).  
16  
17  
18  
19

20 Our analyses revealed dramatic variation in the prevalence of diabetes between  
21  
22 states and local areas in India (**Table 3**). In an initial multilevel model adjusted for age  
23  
24 and gender, states and local areas (defined as villages in rural areas and census blocks in  
25  
26 urban areas) contributed 5.9% and 10.8%, respectively, to the total variation in diabetes.  
27  
28 The addition of socioeconomic and demographic characteristics along with BMI to the  
29  
30 model reduced the variance in diabetes attributed to local areas by 41% to 6.4% but the  
31  
32 variation attributed to states was relatively unchanged at 5.4%.  
33  
34  
35

36 Overall in India, the log odds for diabetes for the reference category (a 32 year old  
37  
38 married women, with no education, BMI < 18.5 kg/m<sup>2</sup>, belonging to the other caste  
39  
40 group, in the poorest fifth of households, and living in a rural area) was -6.13 or a 0.22%  
41  
42 probability of diabetes. Compared to this national reference point, being a resident of  
43  
44 several Southern and Northeastern states was associated with a statistically significant  
45  
46 increase in the odds of diabetes (**Figure 1**). The odds ratios for these states were 2.29  
47  
48 (Tripura), 1.69 (Tamil Nadu), 1.69 (Kerala), 1.71 (Goa), 1.49 (Andhra Pradesh), and 1.56  
49  
50 (West Bengal). In contrast being resident of the states of Rajasthan, Jammu & Kashmir,  
51  
52 Uttar Pradesh, Punjab, Madhya Pradesh, and Assam in Northern and Central India was  
53  
54  
55  
56  
57  
58  
59  
60

1  
2  
3 associated with a statistically significant decrease ( $OR < 1$ ) in the odds of reporting  
4  
5 diabetes.  
6  
7

8 We conducted several sensitivity analyses to assess the consistency of our  
9  
10 findings. First, we examined whether the observed associations were related to  
11  
12 respondents' awareness and knowledge about diabetes. To do so, we considered  
13  
14 responses to the question, "Do you have diabetes?" as a categorical variable, comparing  
15  
16 "yes" and "don't know" versus "no" across the same set of independent variables using a  
17  
18 multinomial logistic model. Associations between SES variables and positive reports of  
19  
20 diabetes from this model, which included the possibility that respondents were unaware  
21  
22 of their diabetes status, were nearly identical to findings from the logistic model which  
23  
24 excluded those with unknown diabetes status (**Supplemental table 1**). The multinomial  
25  
26 model also revealed that the richer and more highly educated respondents were less likely  
27  
28 to report "do not know" as their diabetes status (compared to "no"). In addition, we  
29  
30 examined BMI across the three categories of diabetes status (**Figure 3**). This revealed  
31  
32 that those reporting "do not know" had the lowest BMI (mean 20.9, SD 3.7) which was  
33  
34 largely consistent with the "no" group (mean 21.1, SD 3.9) and substantially lower than  
35  
36 those reporting "yes" to diabetes (mean 24.4, SD 4.9). Finally, we examined interactions  
37  
38 between socioeconomic variables (caste, education, wealth) and diabetes by residential  
39  
40 location. Tests of these interactions were not statistically significant ( $P=0.20$  for caste;  
41  
42  $P=0.72$  for education;  $P=0.66$  for wealth).  
43  
44  
45  
46  
47  
48  
49  
50  
51  
52  
53  
54  
55  
56  
57  
58  
59  
60

## DISCUSSION

In this study, we have two key findings. First, measures of SES were positively associated with self-reported diabetes in the NFHS-3. Although the observed effects of caste and education were largely attenuated in fully adjusted models, the effect of household wealth remained positive, graded and statistically significant even after controlling for BMI. Second, we observed a large variation in the prevalence of diabetes between local areas and States in India. A few Southern and northeastern states were associated with a higher risk for reporting diabetes while several northern and central states were at lower risk after adjusting for individual characteristics and place of residence.

There are a few limitations to our study. First, the outcome was defined on the basis of self-reported diabetes, although interviews were conducted in person using a standardized instrument. Previous research has shown good agreement for self-reported diabetes when compared to medical records in a US population.[39] In addition, our sensitivity analyses considering respondents who reported “did not know” for their diabetes status were nearly identical to the main analyses. We find, however, evidence that higher SES groups were less likely to report “did not know” as compared to “no”, which has been suggested previously on studies using self-reports of diabetes status in India.[6] However, the “did not know” group was more similar in terms of BMI, education, and wealth to the “no” rather than “yes” group. In addition, our sample was relatively young (<55 y for men and <50 y for women). The prevalence of diabetes increases with age and whether a similar SES-diabetes relationship exists among middle and older age groups in India is not clear.

1  
2  
3 Our findings of positive SES-diabetes associations are consistent with previous  
4 studies done in different parts of India. For example, an analysis of rural participants  
5 from the Indian Migration Study, which sampled primarily from four large states in the  
6 north, centre, and south of India [8], identified a positive SES-diabetes gradient among  
7 men (8.0% prevalence in high SES group v 1.8% in low SES group), and a weaker  
8 positive SES-diabetes association that was not statistically significant among women  
9 (5.1% v 3.9%). In addition, a study done in an urban setting in Madras (Chennai) found  
10 an odds ratio for diabetes of 2.2 (95% credible interval [CI]: 1.7-2.7) for high v low SES  
11 groups.[9] One larger study conducted in urban and rural surveillance locations in  
12 Northern, Southern, Eastern, and Western/Central India identified an odds ratio of 3.0  
13 (95% CI: 2.5-3.7) for self-reported diabetes for those with graduate level education  
14 versus those without formal schooling.[6] Importantly, these studies were limited to  
15 selected geographical areas or cities in India. Our study has added to this literature using  
16 a national population health survey with good coverage in rural areas across India.  
17  
18  
19  
20  
21  
22  
23  
24  
25  
26  
27  
28  
29  
30  
31  
32  
33  
34  
35

36 Previous research in India has identified a strong positive relation between SES  
37 and BMI among women and men in India. [40-42] These studies are important because  
38 they have used similar markers of SES in the Indian context along with an objectively  
39 defined outcome (height and weight were measured in NFHS and not self-reported).  
40 BMI (along with other measures of body weight) is an important risk factor for the  
41 development of type 2 diabetes. [36 38 43] Therefore, the consistency of our findings of a  
42 positive SES-diabetes association after controlling for BMI is encouraging. If BMI is  
43 part of the causal pathway between SES and diabetes, attenuation in the effect size for  
44 markers of SES would be expected. The graded and positive relation between household  
45  
46  
47  
48  
49  
50  
51  
52  
53  
54  
55  
56  
57  
58  
59  
60

1  
2  
3 wealth and diabetes after accounting for BMI suggests that there are additional effects of  
4 household wealth on diabetes that are not mediated by BMI.  
5  
6

7  
8 When compared to other studies in India, the overall prevalence of diabetes in the  
9 NFHS-3 was not high. This may have resulted from a combination of using self-reports  
10 of diabetes, the younger age of the NFHS-3 target population, and sampling from the  
11 general population which included a high proportion of respondents in rural areas.  
12  
13

14  
15 Among individuals over 30 years of age, the prevalence was 2.5% (3.0 % in men and  
16 2.2% in women). Other studies using in rural India using similar age groups and blood  
17 measurements have reported diabetes prevalence of 4% and a study from rural Andhra  
18 Pradesh found a prevalence of 12% based on combination self-report and blood  
19 measurements.[8 44]  
20  
21  
22  
23  
24  
25  
26  
27  
28

29 The current national estimate for diabetes prevalence in India is about 7% of the  
30 adult population aged 20-79. This estimate is based on 3 relatively recent and larger  
31 scale studies using a combination of oral glucose tolerance testing and self-reports of  
32 diabetes.[4-6] There continues to be considerable uncertainty in estimates of diabetes for  
33 the whole of India due to the limited study locations (with a focus on urban areas), wide  
34 variation in survey sampling methodology, differences in diabetes diagnostic criteria, and  
35 age groups studied. These differences in study design have hindered direct comparison  
36 of the prevalence between studies, across regions and over time. The NFHS-3 provides  
37 and important benchmark because it is the first nationally-representative survey of  
38 diabetes in India. Even if the prevalence estimates of diabetes have been underestimated  
39 in the NFHS-3, the observed SES-diabetes associations are plausible and important.  
40  
41  
42  
43  
44  
45  
46  
47  
48  
49  
50  
51  
52  
53  
54  
55  
56  
57  
58  
59  
60  
61  
62  
63  
64  
65  
66  
67  
68  
69  
70  
71  
72  
73  
74  
75  
76  
77  
78  
79  
80  
81  
82  
83  
84  
85  
86  
87  
88  
89  
90  
91  
92  
93  
94  
95  
96  
97  
98  
99  
100  
101  
102  
103  
104  
105  
106  
107  
108  
109  
110  
111  
112  
113  
114  
115  
116  
117  
118  
119  
120  
121  
122  
123  
124  
125  
126  
127  
128  
129  
130  
131  
132  
133  
134  
135  
136  
137  
138  
139  
140  
141  
142  
143  
144  
145  
146  
147  
148  
149  
150  
151  
152  
153  
154  
155  
156  
157  
158  
159  
160  
161  
162  
163  
164  
165  
166  
167  
168  
169  
170  
171  
172  
173  
174  
175  
176  
177  
178  
179  
180  
181  
182  
183  
184  
185  
186  
187  
188  
189  
190  
191  
192  
193  
194  
195  
196  
197  
198  
199  
200  
201  
202  
203  
204  
205  
206  
207  
208  
209  
210  
211  
212  
213  
214  
215  
216  
217  
218  
219  
220  
221  
222  
223  
224  
225  
226  
227  
228  
229  
230  
231  
232  
233  
234  
235  
236  
237  
238  
239  
240  
241  
242  
243  
244  
245  
246  
247  
248  
249  
250  
251  
252  
253  
254  
255  
256  
257  
258  
259  
260  
261  
262  
263  
264  
265  
266  
267  
268  
269  
270  
271  
272  
273  
274  
275  
276  
277  
278  
279  
280  
281  
282  
283  
284  
285  
286  
287  
288  
289  
290  
291  
292  
293  
294  
295  
296  
297  
298  
299  
300  
301  
302  
303  
304  
305  
306  
307  
308  
309  
310  
311  
312  
313  
314  
315  
316  
317  
318  
319  
320  
321  
322  
323  
324  
325  
326  
327  
328  
329  
330  
331  
332  
333  
334  
335  
336  
337  
338  
339  
340  
341  
342  
343  
344  
345  
346  
347  
348  
349  
350  
351  
352  
353  
354  
355  
356  
357  
358  
359  
360  
361  
362  
363  
364  
365  
366  
367  
368  
369  
370  
371  
372  
373  
374  
375  
376  
377  
378  
379  
380  
381  
382  
383  
384  
385  
386  
387  
388  
389  
390  
391  
392  
393  
394  
395  
396  
397  
398  
399  
400  
401  
402  
403  
404  
405  
406  
407  
408  
409  
410  
411  
412  
413  
414  
415  
416  
417  
418  
419  
420  
421  
422  
423  
424  
425  
426  
427  
428  
429  
430  
431  
432  
433  
434  
435  
436  
437  
438  
439  
440  
441  
442  
443  
444  
445  
446  
447  
448  
449  
450  
451  
452  
453  
454  
455  
456  
457  
458  
459  
460  
461  
462  
463  
464  
465  
466  
467  
468  
469  
470  
471  
472  
473  
474  
475  
476  
477  
478  
479  
480  
481  
482  
483  
484  
485  
486  
487  
488  
489  
490  
491  
492  
493  
494  
495  
496  
497  
498  
499  
500  
501  
502  
503  
504  
505  
506  
507  
508  
509  
510  
511  
512  
513  
514  
515  
516  
517  
518  
519  
520  
521  
522  
523  
524  
525  
526  
527  
528  
529  
530  
531  
532  
533  
534  
535  
536  
537  
538  
539  
540  
541  
542  
543  
544  
545  
546  
547  
548  
549  
550  
551  
552  
553  
554  
555  
556  
557  
558  
559  
560  
561  
562  
563  
564  
565  
566  
567  
568  
569  
570  
571  
572  
573  
574  
575  
576  
577  
578  
579  
580  
581  
582  
583  
584  
585  
586  
587  
588  
589  
590  
591  
592  
593  
594  
595  
596  
597  
598  
599  
600  
601  
602  
603  
604  
605  
606  
607  
608  
609  
610  
611  
612  
613  
614  
615  
616  
617  
618  
619  
620  
621  
622  
623  
624  
625  
626  
627  
628  
629  
630  
631  
632  
633  
634  
635  
636  
637  
638  
639  
640  
641  
642  
643  
644  
645  
646  
647  
648  
649  
650  
651  
652  
653  
654  
655  
656  
657  
658  
659  
660  
661  
662  
663  
664  
665  
666  
667  
668  
669  
670  
671  
672  
673  
674  
675  
676  
677  
678  
679  
680  
681  
682  
683  
684  
685  
686  
687  
688  
689  
690  
691  
692  
693  
694  
695  
696  
697  
698  
699  
700  
701  
702  
703  
704  
705  
706  
707  
708  
709  
710  
711  
712  
713  
714  
715  
716  
717  
718  
719  
720  
721  
722  
723  
724  
725  
726  
727  
728  
729  
730  
731  
732  
733  
734  
735  
736  
737  
738  
739  
740  
741  
742  
743  
744  
745  
746  
747  
748  
749  
750  
751  
752  
753  
754  
755  
756  
757  
758  
759  
760  
761  
762  
763  
764  
765  
766  
767  
768  
769  
770  
771  
772  
773  
774  
775  
776  
777  
778  
779  
780  
781  
782  
783  
784  
785  
786  
787  
788  
789  
790  
791  
792  
793  
794  
795  
796  
797  
798  
799  
800  
801  
802  
803  
804  
805  
806  
807  
808  
809  
810  
811  
812  
813  
814  
815  
816  
817  
818  
819  
820  
821  
822  
823  
824  
825  
826  
827  
828  
829  
830  
831  
832  
833  
834  
835  
836  
837  
838  
839  
840  
841  
842  
843  
844  
845  
846  
847  
848  
849  
850  
851  
852  
853  
854  
855  
856  
857  
858  
859  
860  
861  
862  
863  
864  
865  
866  
867  
868  
869  
870  
871  
872  
873  
874  
875  
876  
877  
878  
879  
880  
881  
882  
883  
884  
885  
886  
887  
888  
889  
890  
891  
892  
893  
894  
895  
896  
897  
898  
899  
900  
901  
902  
903  
904  
905  
906  
907  
908  
909  
910  
911  
912  
913  
914  
915  
916  
917  
918  
919  
920  
921  
922  
923  
924  
925  
926  
927  
928  
929  
930  
931  
932  
933  
934  
935  
936  
937  
938  
939  
940  
941  
942  
943  
944  
945  
946  
947  
948  
949  
950  
951  
952  
953  
954  
955  
956  
957  
958  
959  
960  
961  
962  
963  
964  
965  
966  
967  
968  
969  
970  
971  
972  
973  
974  
975  
976  
977  
978  
979  
980  
981  
982  
983  
984  
985  
986  
987  
988  
989  
990  
991  
992  
993  
994  
995  
996  
997  
998  
999  
1000



1  
2  
3 markers, which may be a key determinant of diabetes. Further large-scale population-  
4  
5 based surveys can be strengthened by using simple finger-prick blood glucose  
6  
7 measurements in addition to self-reports.  
8  
9

10  
11 There has been considerable concern over the rising prevalence of diabetes in  
12  
13 India, especially with studies on migrant Indian populations suggesting that South Asians  
14  
15 may be more susceptible to the disease. In light of current findings, it appears that, at  
16  
17 present, the more well-off segments of the Indian population are at greatest risk. This  
18  
19 poses concerns on how to appropriately balance priorities to address the disease burden  
20  
21 that afflicts the non poor versus the poor in the context of India where 40-50 percent[45]  
22  
23 of the population are poor.  
24  
25  
26  
27  
28

## 29 **ACKNOWLEDGEMENTS**

30  
31 SVS and DJC planned the study. DJC conducted statistical analyses and drafted the  
32  
33 manuscript with supervision from SVS. Both authors participated in interpretation of the  
34  
35 results and critical revisions of the manuscript.  
36  
37

38  
39 The NFHS data are available through the Measure DHS project at [www.measuredhs.com](http://www.measuredhs.com).  
40  
41  
42  
43  
44  
45  
46  
47  
48  
49  
50  
51  
52  
53  
54  
55  
56  
57  
58  
59  
60

## REFERENCES

1. Rao KS, Mukherjee NR, Rao KV. A survey of diabetes mellitus in a rural population of India. *Diabetes* 1972;**21**:1192-6.
2. Gupta OP, Joshi MH, Dave SK. Prevalence of diabetes in India. *Adv Metab Disord* 1978;**9**:147-65.
3. Ahuja MM. Recent contributions to the epidemiology of diabetes mellitus in India. *Int J Diab Developing Countires* 1991;**11**:5-9.
4. Ramachandran A, Snehalatha C, Kapur A, et al. High prevalence of diabetes and impaired glucose tolerance in India: National Urban Diabetes Survey. *Diabetologia* 2001;**44**:1094-101.
5. Sadikot SM, Nigam A, Das S, et al. The burden of diabetes and impaired glucose tolerance in India using the WHO 1999 criteria: prevalence of diabetes in India study (PODIS). *Diabetes Res Clin Pract* 2004;**66**:301-7.
6. Mohan V, Mathur P, Deepa R, et al. Urban rural differences in prevalence of self-reported diabetes in India--the WHO-ICMR Indian NCD risk factor surveillance. *Diabetes Res Clin Pract* 2008;**80**:159-68.
7. Beaglehole R, Bonita R, Alleyne G, et al. UN High-Level Meeting on Non-Communicable Diseases: addressing four questions. *Lancet* 2011;**378**:449-55.
8. Kinra S, Bowen LJ, Lyngdoh T, et al. Sociodemographic patterning of non-communicable disease risk factors in rural India: a cross sectional study. *BMJ* 2010;**341**:c4974.
9. Ramachandran A, Snehalatha C, Vijay V, King H. Impact of poverty on the prevalence of diabetes and its complications in urban southern India. *Diabet Med* 2002;**19**:130-5.
10. World Health Organization. Prevention of diabetes mellitus. Report of a WHO Study Group. WHO Technical Report Series 844. Geneva: World Health Organization, 1994.
11. Hu FB, Manson JE, Stampfer MJ, et al. Diet, lifestyle, and the risk of type 2 diabetes mellitus in women. *N Engl J Med* 2001;**345**:790-7.
12. Psaltopoulou T, Ilias I, Alevizaki M. The role of diet and lifestyle in primary, secondary, and tertiary diabetes prevention: a review of meta-analyses. *Rev Diabet Stud* 2010;**7**:26-35.
13. Adler NE, Newman K. Socioeconomic disparities in health: pathways and policies. *Health Aff (Millwood)* 2002;**21**:60-76.
14. Brown AF, Ettner SL, Piette J, et al. Socioeconomic position and health among persons with diabetes mellitus: a conceptual framework and review of the literature. *Epidemiol Rev* 2004;**26**:63-77.
15. Sims M, Diez Roux AV, Boykin S, et al. The socioeconomic gradient of diabetes prevalence, awareness, treatment, and control among african americans in the jackson heart study. *Ann Epidemiol* 2011;**21**:892-8.
16. Krishnan S, Cozier YC, Rosenberg L, Palmer JR. Socioeconomic status and incidence of type 2 diabetes: results from the Black Women's Health Study. *Am J Epidemiol* 2010;**171**:564-70.
17. Robbins JM, Vaccarino V, Zhang H, Kasl SV. Socioeconomic status and type 2 diabetes in African American and non-Hispanic white women and men: evidence

- 1  
2  
3 from the Third National Health and Nutrition Examination Survey. *Am J Public*  
4 *Health* 2001;**91**:76-83.
- 5  
6 18. Dinca-Panaitescu S, Dinca-Panaitescu M, Bryant T, Daiski I, Pilkington B, Raphael  
7 D. Diabetes prevalence and income: Results of the Canadian Community Health  
8 Survey. *Health Policy* 2011;**99**:116-23.
- 9  
10 19. Agardh E, Allebeck P, Hallqvist J, Moradi T, Sidorchuk A. Type 2 diabetes incidence  
11 and socio-economic position: a systematic review and meta-analysis. *Int J*  
12 *Epidemiol* 2011;**40**:804-18.
- 13  
14 20. Mohan V, Sandeep S, Deepa R, Shah B, Varghese C. Epidemiology of type 2  
15 diabetes: Indian scenario. *Indian J Med Res* 2007;**125**:217-30.
- 16  
17 21. Shaw JE, Sicree RA, Zimmet PZ. Global estimates of the prevalence of diabetes for  
18 2010 and 2030. *Diabetes Res Clin Pract* 2010;**87**:4-14.
- 19  
20 22. Mohan V, Deepa M, Deepa R, et al. Secular trends in the prevalence of diabetes and  
21 impaired glucose tolerance in urban South India--the Chennai Urban Rural  
22 Epidemiology Study (CURES-17). *Diabetologia* 2006;**49**:1175-8.
- 23  
24 23. Ramachandran A, Snehalatha C, Latha E, Vijay V, Viswanathan M. Rising  
25 prevalence of NIDDM in an urban population in India. *Diabetologia* 1997;**40**:232-  
26 7.
- 27  
28 24. International Institute for Population Sciences (IIPS) and Macro International.  
29 *National Family Health Survey (NFHS-3), 2005-06: India: Volume I*. Mumbai:  
30 IIPS, 2007.
- 31  
32 25. International Institute for Population Sciences (IIPS) and Macro International.  
33 *National Family Health Survey (NFHS-3), 2005-06: India: Volume II*. Mumbai:  
34 IIPS, 2007.
- 35  
36 26. Macro International Incorporated. Sampling Manual. Calverton, Maryland: DHS-III  
37 Basic Documentation No. 6, 1996.
- 38  
39 27. ICF Macro. Demographic and Health Survey Interviewer's Manual. MEASURE DHS  
40 Basic Documentation No. 2. Calverton, Maryland, U.S.A.: ICF Macro, 2011.
- 41  
42 28. Chitnis S. Definition of the terms scheduled castes and scheduled tribes: a crisis of  
43 ambivalence. In: Pai Panandiker VA, ed. *The Politics of Backwardness:*  
44 *Reservation Policy in India*. New Delhi, India: Centre for Policy Research, 1997.
- 45  
46 29. Rutstein SO, Johnson K. The DHS Wealth Index. DHS Comparative Reports No. 6.  
47 Calverton, Maryland, USA: ORC Macro, 2004.
- 48  
49 30. Filmer D, Pritchett L. Estimating wealth effects without expenditure data-or tears: an  
50 application to education enrollments in states of India *Demography* 2001;**37**:155-  
51 74.
- 52  
53 31. World Health Organization (WHO) Expert Consultation. Appropriate body-mass  
54 index for Asian populations and its implications for policy and intervention  
55 strategies. *Lancet* 2004;**363**:157-63.
- 56  
57 32. Subramanian SV, Jones K, Duncan C. Multilevel methods for public health research.  
58 In: Kawachi I, Berkman LF, eds. *Neighborhoods and Health*. New York, NY:  
59 Oxford University Press, 2003:65-111.
- 60  
61 33. Goldstein H. *Multilevel statistical models*. 3rd ed. London: Arnold, 2003.
- 62  
63 34. Rasbash J, Browne WJ, Healy M, Cameron B, Charlton C. MLwiN Version 2.20.  
64 Bristol, UK: Centre for Multilevel Modelling, University of Bristol, 2010.

- 1
- 2
- 3
- 4 35. Browne WJ. MCMC estimation in MLwiN. Bristol, UK: Centre for Multilevel
- 5 Modelling, University of Bristol, 2009.
- 6 36. Koh-Banerjee P, Wang Y, Hu FB, Spiegelman D, Willett WC, Rimm EB. Changes in
- 7 body weight and body fat distribution as risk factors for clinical diabetes in US
- 8 men. *Am J Epidemiol* 2004;**159**:1150-9.
- 9 37. Vazquez G, Duval S, Jacobs DR, Jr., Silventoinen K. Comparison of body mass
- 10 index, waist circumference, and waist/hip ratio in predicting incident diabetes: a
- 11 meta-analysis. *Epidemiol Rev* 2007;**29**:115-28.
- 12 38. Guh DP, Zhang W, Bansback N, Amarsi Z, Birmingham CL, Anis AH. The incidence
- 13 of co-morbidities related to obesity and overweight: a systematic review and
- 14 meta-analysis. *BMC Public Health* 2009;**9**:88.
- 15 39. Okura Y, Urban LH, Mahoney DW, Jacobsen SJ, Rodeheffer RJ. Agreement between
- 16 self-report questionnaires and medical record data was substantial for diabetes,
- 17 hypertension, myocardial infarction and stroke but not for heart failure. *J Clin*
- 18 *Epidemiol* 2004;**57**:1096-103.
- 19 40. Subramanian SV, Smith GD. Patterns, distribution, and determinants of under- and
- 20 overnutrition: a population-based study of women in India. *Am J Clin Nutr*
- 21 2006;**84**:633-40.
- 22 41. Ackerson LK, Kawachi I, Barbeau EM, Subramanian SV. Geography of underweight
- 23 and overweight among women in India: a multilevel analysis of 3204
- 24 neighborhoods in 26 states. *Econ Hum Biol* 2008;**6**:264-80.
- 25 42. Subramanian SV, Perkins JM, Khan KT. Do burdens of underweight and overweight
- 26 coexist among lower socioeconomic groups in India? *Am J Clin Nutr*
- 27 2009;**90**:369-76.
- 28 43. Colditz GA, Willett WC, Rotnitzky A, Manson JE. Weight gain as a risk factor for
- 29 clinical diabetes mellitus in women. *Ann Intern Med* 1995;**122**:481-6.
- 30 44. Chow CK, Raju PK, Raju R, et al. The prevalence and management of diabetes in
- 31 rural India. *Diabetes Care* 2006;**29**:1717-8.
- 32 45. Alkire S, Santos ME. India Country Briefing. Oxford Poverty & Human
- 33 Development Initiative (OPHI) Multidimensional Poverty Index Country Briefing
- 34 Series. Available at: [www.ophi.org.uk/policy/multidimensional-poverty-](http://www.ophi.org.uk/policy/multidimensional-poverty-index/mpi-country-briefings/)
- 35 [index/mpi-country-briefings/](http://www.ophi.org.uk/policy/multidimensional-poverty-index/mpi-country-briefings/), 2010.
- 36
- 37
- 38
- 39
- 40
- 41
- 42
- 43
- 44
- 45
- 46
- 47
- 48
- 49
- 50
- 51
- 52
- 53
- 54
- 55
- 56
- 57
- 58
- 59
- 60

**Table 1:** Characteristics of survey participants and frequency distribution of self-reported diabetes in India, males and females from the 3<sup>rd</sup> National Family Health Survey

|                       | Diabetes |     | Total  |
|-----------------------|----------|-----|--------|
|                       | n        | %   | n      |
| Participants          | 2439     | 1.5 | 168135 |
| Residence             |          |     |        |
| Rural                 | 818      | 1.0 | 86013  |
| Urban                 | 1621     | 2.0 | 82122  |
| Age group             |          |     |        |
| 18-29 y               | 266      | 0.3 | 76174  |
| 30-39 y               | 602      | 1.2 | 51132  |
| 40-49 y               | 1238     | 3.4 | 36402  |
| 50-54 y               | 333      | 7.5 | 4427   |
| Gender                |          |     |        |
| Male                  | 1144     | 1.8 | 65255  |
| Female                | 1295     | 1.3 | 102880 |
| Marital status        |          |     |        |
| Single                | 132      | 0.3 | 38078  |
| Married               | 2165     | 1.8 | 123457 |
| Widowed               | 108      | 2.5 | 4320   |
| Divorced or separated | 34       | 1.5 | 2280   |
| Religion              |          |     |        |
| Hindu                 | 1775     | 1.4 | 123411 |
| Muslim                | 340      | 1.6 | 21510  |
| Christian             | 213      | 1.4 | 14779  |
| Sikh                  | 49       | 1.5 | 3236   |
| Buddhist              | 34       | 1.4 | 2451   |
| Other                 | 28       | 1.0 | 2748   |
| Social Caste          |          |     |        |
| Other caste           | 1026     | 1.8 | 56063  |
| Scheduled caste       | 349      | 1.3 | 27677  |
| Scheduled tribe       | 167      | 0.8 | 21372  |
| Other backward class  | 781      | 1.4 | 55641  |
| No caste              | 116      | 1.6 | 7382   |
| Education             |          |     |        |
| No education          | 464      | 1.0 | 44856  |
| Primary               | 358      | 1.4 | 24969  |
| Secondary             | 1166     | 1.6 | 74715  |

|                                      |      |     |       |
|--------------------------------------|------|-----|-------|
| Higher                               | 451  | 1.9 | 23595 |
| Household wealth                     |      |     |       |
| Poorest                              | 77   | 0.4 | 17252 |
| 2                                    | 175  | 0.8 | 22948 |
| 3                                    | 278  | 0.9 | 32070 |
| 4                                    | 573  | 1.4 | 42091 |
| Richest                              | 1336 | 2.5 | 53774 |
| Body mass index (kg/m <sup>2</sup> ) |      |     |       |
| <18.5                                | 243  | 0.6 | 42128 |
| 18.5-23                              | 703  | 0.9 | 74089 |
| 23-27.5                              | 833  | 2.7 | 31217 |
| 27.5+                                | 547  | 4.8 | 11502 |

---

**Table 2:** Associations between socioeconomic status and self-reported diabetes in India;  
3<sup>rd</sup> National family health survey

| Variable               | Model adjusted for age,<br>gender, marital status,<br>religion, residence |             | Mutually adjusted<br>model |             | Mutually adjusted<br>model with BMI |             |
|------------------------|---------------------------------------------------------------------------|-------------|----------------------------|-------------|-------------------------------------|-------------|
|                        | Odds<br>ratio                                                             | 95% CI      | Odds<br>ratio              | 95% CI      | Odds<br>ratio                       | 95% CI      |
| <b>Caste</b>           |                                                                           |             |                            |             |                                     |             |
| Other caste            | 1.00                                                                      |             | 1.00                       |             | 1.00                                |             |
| Scheduled caste        | 0.81                                                                      | 0.71 , 0.94 | 1.05                       | 0.91 , 1.21 | 1.07                                | 0.93 , 1.24 |
| Scheduled tribe        | 0.57                                                                      | 0.46 , 0.70 | 0.72                       | 0.58 , 0.90 | 0.73                                | 0.57 , 0.92 |
| Other backward caste   | 0.84                                                                      | 0.75 , 0.94 | 0.95                       | 0.85 , 1.07 | 0.96                                | 0.86 , 1.08 |
| No caste               | 0.89                                                                      | 0.71 , 1.11 | 0.94                       | 0.75 , 1.17 | 0.95                                | 0.76 , 1.20 |
| <b>Wealth</b>          |                                                                           |             |                            |             |                                     |             |
| Poorest                | 1.00                                                                      |             | 1.00                       |             | 1.00                                |             |
| 2nd quintile           | 1.59                                                                      | 1.20 , 2.12 | 1.57                       | 1.21 , 2.07 | 1.49                                | 1.14 , 1.96 |
| 3rd quintile           | 1.63                                                                      | 1.23 , 2.16 | 1.55                       | 1.21 , 2.02 | 1.39                                | 1.07 , 1.81 |
| 4th quintile           | 2.42                                                                      | 1.85 , 3.17 | 2.25                       | 1.76 , 2.92 | 1.79                                | 1.40 , 2.34 |
| Richest                | 4.04                                                                      | 3.08 , 5.30 | 3.65                       | 2.83 , 4.78 | 2.58                                | 1.99 , 3.40 |
| <b>Education</b>       |                                                                           |             |                            |             |                                     |             |
| No education           | 1.00                                                                      |             | 1.00                       |             | 1.00                                |             |
| Primary                | 1.23                                                                      | 1.06 , 1.43 | 1.06                       | 0.91 , 1.22 | 1.00                                | 0.86 , 1.17 |
| Secondary              | 1.68                                                                      | 1.49 , 1.90 | 1.18                       | 1.04 , 1.35 | 1.12                                | 0.98 , 1.28 |
| Higher                 | 1.87                                                                      | 1.61 , 2.18 | 1.12                       | 0.95 , 1.32 | 1.01                                | 0.86 , 1.20 |
| <b>Body mass index</b> |                                                                           |             |                            |             |                                     |             |
| <18.5                  |                                                                           |             |                            |             | 1.00                                |             |
| 18.5-23                |                                                                           |             |                            |             | 1.25                                | 1.08 , 1.46 |
| 23-27.5                |                                                                           |             |                            |             | 2.08                                | 1.79 , 2.44 |
| 27.5+                  |                                                                           |             |                            |             | 2.98                                | 2.51 , 3.54 |

**Table 3:** Variance in self-reported diabetes status between local areas and states in India; expressed as percentage of the contribution to the total variance in diabetes

|             | Age & gender adjusted* |       |      | Fully adjusted** |       |     |
|-------------|------------------------|-------|------|------------------|-------|-----|
|             | Variance               | SE    | %    | Variance         | SE    | %   |
| States      | 0.231                  | 0.076 | 5.9  | 0.204            | 0.068 | 5.4 |
| Local areas | 0.425                  | 0.043 | 10.8 | 0.240            | 0.041 | 6.4 |

\*Multilevel model adjusted for age and gender only

\*\*Multilevel model fully adjusted for age, gender, marital status, religion, social caste, household wealth, education, body mass index, and place of residence

## FIGURE LEGENDS

**Figure 1** State level prevalence of self-reported diabetes in India for men aged 18-54 (left) and women aged 18-49 (right). Darker colours indicate higher prevalence.

**Figure 2** Odds ratios for self-reported diabetes by state of residence in India; adjusted for age, gender, marital status, religion, social caste, household wealth, education, body mass index and place of residence.

**Figure 3** Mean body mass index across three possible responses for self-reported diabetes (diabetes status not known, No- do not have diabetes, Yes- have diabetes). Vertical lines represent 95% confidence intervals. Body mass index (in kg/m<sup>2</sup>) objectively defined based on measured height and weight values.



**Supplementary Table 1** Associations between socioeconomic status, self-reported diabetes, and unknown diabetes status using a multinomial regression model.

| Variable               | Diabetes   |             | Diabetes not known |             |
|------------------------|------------|-------------|--------------------|-------------|
|                        | Odds ratio | 95% CI      | Odds ratio         | 95% CI      |
| <b>Caste</b>           |            |             |                    |             |
| Other caste            | 1.00       |             | 1.00               |             |
| Scheduled caste        | 1.07       | 0.93 , 1.24 | 1.13               | 0.96 , 1.31 |
| Scheduled tribe        | 0.73       | 0.58 , 0.91 | 1.52               | 1.25 , 1.84 |
| Other backward caste   | 0.96       | 0.86 , 1.08 | 1.07               | 0.93 , 1.23 |
| No caste               | 0.95       | 0.75 , 1.18 | 0.76               | 0.58 , 0.99 |
| <b>Wealth</b>          |            |             |                    |             |
| Poorest                | 1.00       |             | 1.00               |             |
| 2nd quintile           | 1.51       | 1.14 , 2.03 | 0.90               | 0.77 , 1.05 |
| 3rd quintile           | 1.41       | 1.07 , 1.89 | 0.86               | 0.73 , 1.01 |
| 4th quintile           | 1.82       | 1.38 , 2.44 | 0.82               | 0.68 , 0.98 |
| Richest                | 2.63       | 1.97 , 3.56 | 0.64               | 0.51 , 0.79 |
| <b>Education</b>       |            |             |                    |             |
| No education           | 1.00       |             | 1.00               |             |
| Primary                | 1.00       | 0.87 , 1.17 | 0.86               | 0.76 , 0.99 |
| Secondary              | 1.12       | 0.98 , 1.28 | 0.71               | 0.63 , 0.81 |
| Higher                 | 1.01       | 0.85 , 1.21 | 0.45               | 0.36 , 0.57 |
| <b>Body mass index</b> |            |             |                    |             |
| <18.5                  | 1.00       |             | 1.00               |             |
| 18.5-23                | 1.26       | 1.08 , 1.46 | 1.03               | 0.93 , 1.15 |
| 23-27.5                | 2.09       | 1.79 , 2.45 | 1.17               | 1.01 , 1.36 |
| 27.5+                  | 2.99       | 2.52 , 3.55 | 1.33               | 1.06 , 1.66 |

1  
2  
3  
4  
5  
6  
7  
8  
9  
10  
11  
12  
13  
14  
15  
16  
17  
18  
19  
20  
21  
22  
23  
24  
25  
26  
27  
28  
29  
30  
31  
32  
33  
34  
35  
36  
37  
38  
39  
40  
41  
42  
43  
44  
45  
46  
47  
48  
49

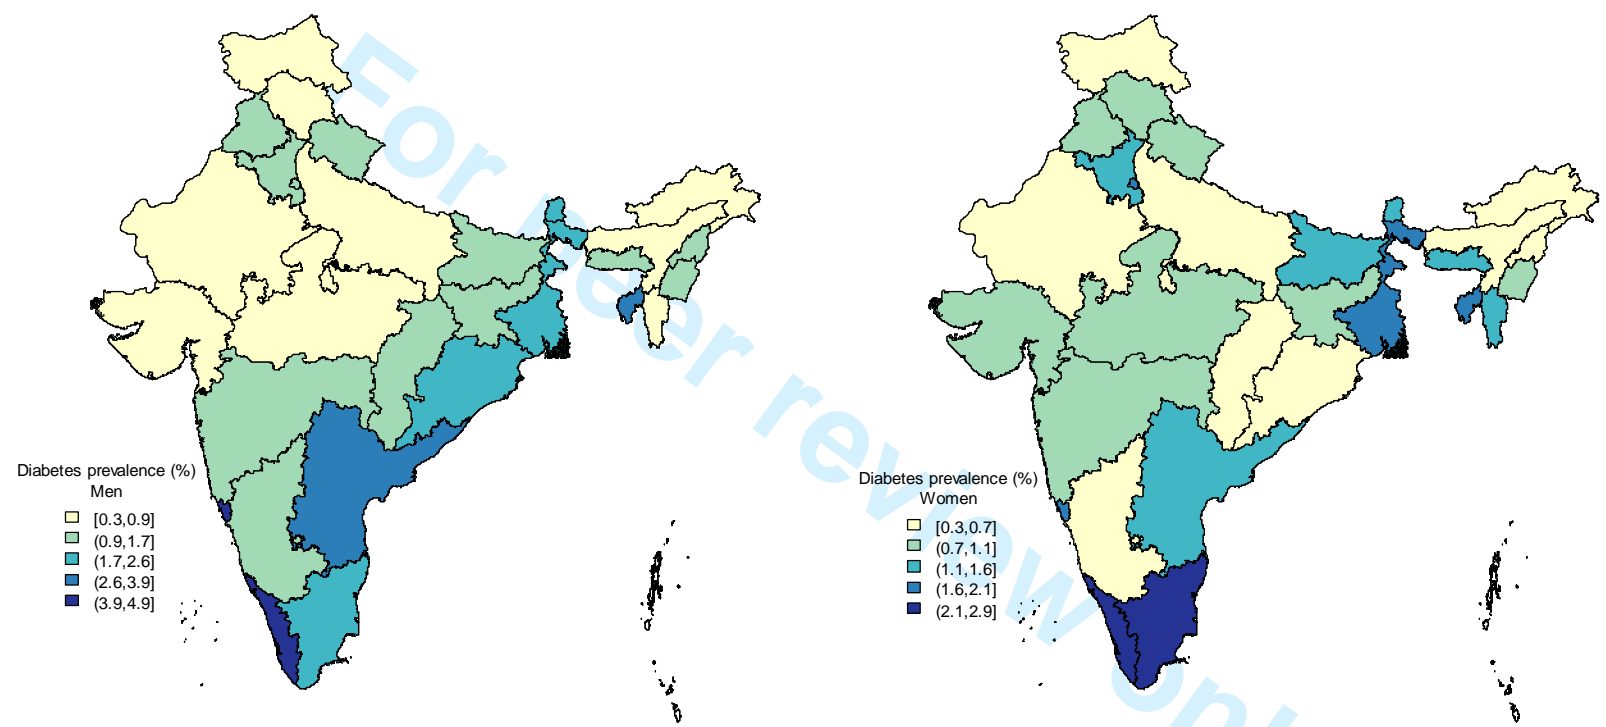

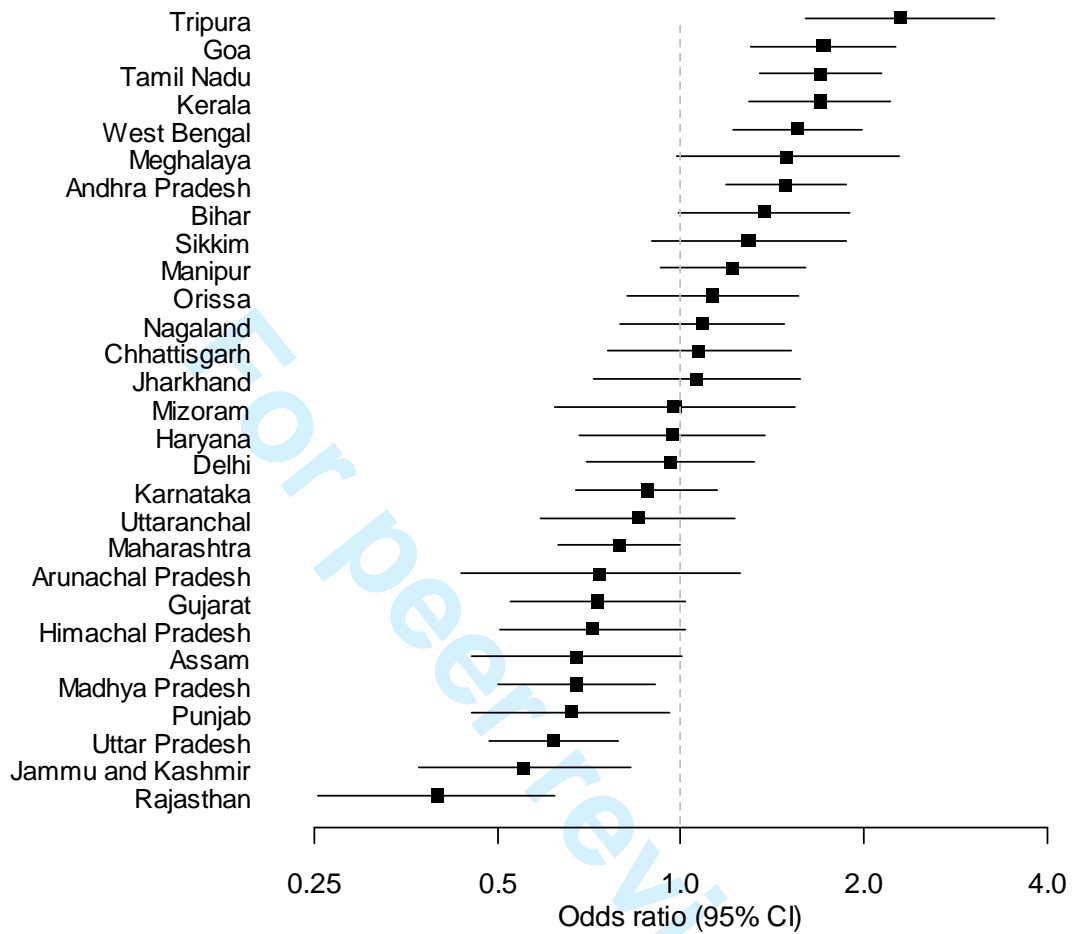

1  
2  
3  
4  
5  
6  
7  
8  
9  
10  
11  
12  
13  
14  
15  
16  
17  
18  
19  
20  
21  
22  
23  
24  
25  
26  
27  
28  
29  
30  
31  
32  
33  
34  
35  
36  
37  
38  
39  
40  
41  
42  
43  
44  
45  
46  
47  
48  
49  
50  
51  
52  
53  
54  
55  
56  
57  
58  
59  
60

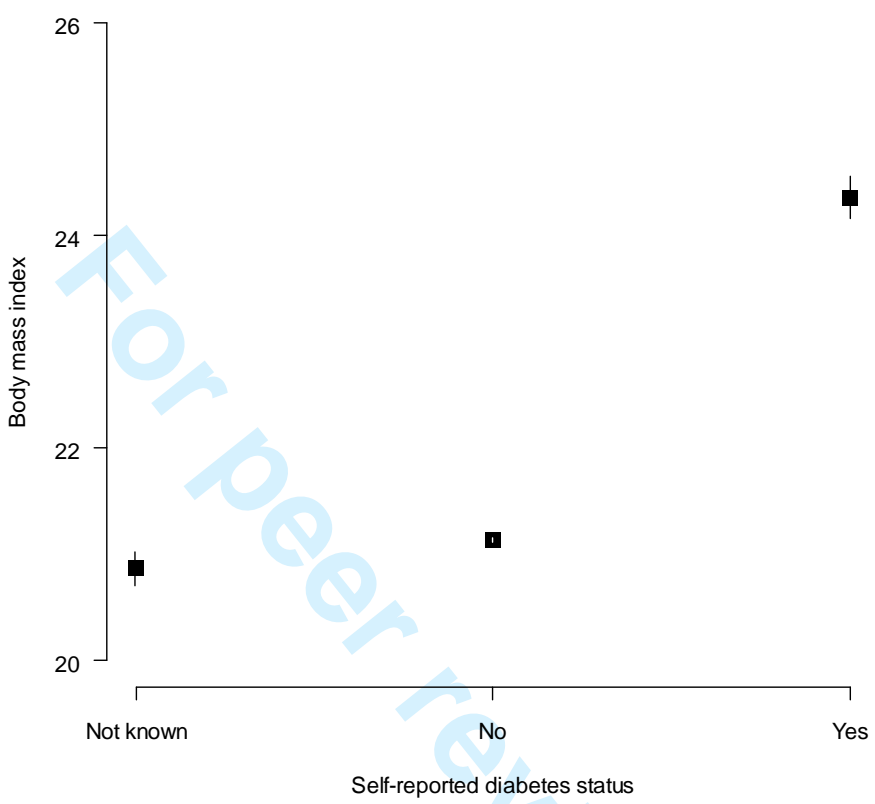

STROBE Statement—Checklist of items that should be included in reports of *cross-sectional studies*

**Article: Association between socioeconomic status and diabetes in India**

**Authors: Daniel J Corsi, SV Subramanian**

|                              | Item No | Recommendation                                                                                                                                                                                                                                                                                                                                                                              |
|------------------------------|---------|---------------------------------------------------------------------------------------------------------------------------------------------------------------------------------------------------------------------------------------------------------------------------------------------------------------------------------------------------------------------------------------------|
| <b>Title and abstract</b>    | 1       | (a) Design cross-sectional study, listed in abstract<br>(b) abstract and article summary (page 3)                                                                                                                                                                                                                                                                                           |
| <b>Introduction</b>          |         |                                                                                                                                                                                                                                                                                                                                                                                             |
| Background/rationale         | 2       | Explain the scientific background and rationale for the investigation being reported, (abstract, page 3, page 4-5)                                                                                                                                                                                                                                                                          |
| Objectives                   | 3       | State specific objectives, including any prespecified hypotheses (abstract, page 3, page 4-5)                                                                                                                                                                                                                                                                                               |
| <b>Methods</b>               |         |                                                                                                                                                                                                                                                                                                                                                                                             |
| Study design                 | 4       | Present key elements of study design early in the paper (abstract, page 6)                                                                                                                                                                                                                                                                                                                  |
| Setting                      | 5       | Describe the setting, locations, and relevant dates, including periods of recruitment, exposure, follow-up, and data collection (abstract, page 5-7)                                                                                                                                                                                                                                        |
| Participants                 | 6       | (a) Give the eligibility criteria, and the sources and methods of selection of participants (page 6)                                                                                                                                                                                                                                                                                        |
| Variables                    | 7       | Clearly define all outcomes, exposures, predictors, potential confounders, and effect modifiers. Give diagnostic criteria, if applicable (page 7)                                                                                                                                                                                                                                           |
| Data sources/<br>measurement | 8*      | For each variable of interest, give sources of data and details of methods of assessment (measurement). Describe comparability of assessment methods if there is more than one group (page 7-8)                                                                                                                                                                                             |
| Bias                         | 9       | Describe any efforts to address potential sources of bias (page 8-9; page 12)                                                                                                                                                                                                                                                                                                               |
| Study size                   | 10      | Explain how the study size was arrived at (page 7)                                                                                                                                                                                                                                                                                                                                          |
| Quantitative<br>variables    | 11      | Explain how quantitative variables were handled in the analyses. If applicable, describe which groupings were chosen and why (page 8)                                                                                                                                                                                                                                                       |
| Statistical methods          | 12      | (a) Describe all statistical methods, including those used to control for confounding (page 8-9)<br>(b) Describe any methods used to examine subgroups and interactions (page 12)<br>(c) Explain how missing data were addressed (page 7)<br>(d) If applicable, describe analytical methods taking account of sampling strategy (page 8)<br>(e) Describe any sensitivity analyses (page 12) |
| <b>Results</b>               |         |                                                                                                                                                                                                                                                                                                                                                                                             |
| Participants                 | 13      | (a) Report numbers of individuals at each stage of study—eg numbers potentially eligible, examined for eligibility, confirmed eligible, included in the study, completing follow-up, and analysed (page 8)<br>(b) Give reasons for non-participation at each stage (n/a)<br>(c) Consider use of a flow diagram (n/a)                                                                        |
| Descriptive data             | 14*     | (a) Give characteristics of study participants (eg demographic, clinical, social) and information on exposures and potential confounders (page 9-10, table 1)<br>(b) Indicate number of participants with missing data for each variable of interest (page 7; page 12)                                                                                                                      |
| Outcome data                 | 15*     | Table 1                                                                                                                                                                                                                                                                                                                                                                                     |
| Main results                 | 16DJC   | (a) Tables 1 (unadjusted), 2 (age, gender, marital status, religion, place of residence adjusted; and fully adjusted model)                                                                                                                                                                                                                                                                 |

|                          |    |                                                                                                                                                                                      |
|--------------------------|----|--------------------------------------------------------------------------------------------------------------------------------------------------------------------------------------|
|                          |    | (b) Report category boundaries when continuous variables were categorized (in methods, e.g. for BMI)                                                                                 |
|                          |    | (c) If relevant, consider translating estimates of relative risk into absolute risk for a meaningful time period (n/a)                                                               |
| Other analyses           | 17 | Report other analyses done—eg analyses of subgroups and interactions, and sensitivity analyses (Page 12)                                                                             |
| <b>Discussion</b>        |    |                                                                                                                                                                                      |
| Key results              | 18 | Summarise key results with reference to study objectives (page 13)                                                                                                                   |
| Limitations              | 19 | Discuss limitations of the study, taking into account sources of potential bias or imprecision. Discuss both direction and magnitude of any potential bias (page 13)                 |
| Interpretation           | 20 | Give a cautious overall interpretation of results considering objectives, limitations, multiplicity of analyses, results from similar studies, and other relevant evidence (page 16) |
| Generalisability         | 21 | Discuss the generalisability (external validity) of the study results (pages 14-15)                                                                                                  |
| <b>Other information</b> |    |                                                                                                                                                                                      |
| Funding                  | 22 | Give the source of funding and the role of the funders for the present study and, if applicable, for the original study on which the present article is based (title page)           |

\*Give information separately for exposed and unexposed groups.

**Note:** An Explanation and Elaboration article discusses each checklist item and gives methodological background and published examples of transparent reporting. The STROBE checklist is best used in conjunction with this article (freely available on the Web sites of PLoS Medicine at <http://www.plosmedicine.org/>, Annals of Internal Medicine at <http://www.annals.org/>, and Epidemiology at <http://www.epidem.com/>). Information on the STROBE Initiative is available at [www.strobe-statement.org](http://www.strobe-statement.org).



**Association between socioeconomic status and self-reported diabetes in India: a cross-sectional multilevel analysis**

|                                 |                                                                                                                                  |
|---------------------------------|----------------------------------------------------------------------------------------------------------------------------------|
| Journal:                        | <i>BMJ Open</i>                                                                                                                  |
| Manuscript ID:                  | bmjopen-2012-000895.R1                                                                                                           |
| Article Type:                   | Research                                                                                                                         |
| Date Submitted by the Author:   | 23-Apr-2012                                                                                                                      |
| Complete List of Authors:       | Corsi, Daniel J; McMaster University, Population Health Research Institute<br>Subramanian, S V; Harvard School of Public Health, |
| <b>Primary Subject Heading</b>: | Epidemiology                                                                                                                     |
| Secondary Subject Heading:      | Diabetes and endocrinology                                                                                                       |
| Keywords:                       | Socioeconomic factors, India, Noncommunicable disease, Diabetes, Geography, Multilevel                                           |
|                                 |                                                                                                                                  |

SCHOLARONE™  
Manuscripts

1  
2  
3 **Title** Association between socioeconomic status and self-reported diabetes in India: a  
4  
5 cross-sectional multilevel analysis  
6  
7

8 **Authors and affiliation**  
9

10 Daniel J Corsi, MSc, Population Health Research Institute, McMaster University,  
11  
12 Hamilton, ON, Canada  
13

14 SV Subramanian, PhD, Professor of Population Health and Geography,  
15  
16 Department of Society, Human Development, and Health, Harvard School of Public  
17  
18 Health, Boston, MA, USA  
19  
20  
21

22 **Corresponding author details**  
23

24 Professor S V Subramanian, Harvard School of Public Health, 677 Huntington Avenue,  
25  
26 Boston MA 02115, USA; Tel: 617-432-6299; Fax: 617-432-3123; Email:  
27  
28

29 [svsubram@hsph.harvard.edu](mailto:svsubram@hsph.harvard.edu)  
30  
31

32 **Running head** Socioeconomic status and diabetes in India  
33

34 **Word count:** 3,340  
35

36 **Funding Statement** This research received no specific grant from any funding agency in  
37  
38 the public, commercial or not-for-profit sectors  
39  
40

41 **Conflict of Interest:** Authors declare no conflict of interest.  
42  
43  
44  
45  
46  
47  
48  
49  
50  
51  
52  
53  
54  
55  
56  
57  
58  
59  
60



## ABSTRACT

**Objectives** To quantify the association between socioeconomic status (SES) and type-2 diabetes in India

**Design** Nationally representative cross-sectional household survey

**Setting** Urban and rural areas across 29 states in India

**Participants** 168,135 survey respondents aged 18-49 y (women) and 18-54 y (men)

**Primary outcome measure** Self-reported diabetes status

**Results** Markers of SES were social caste, household wealth, and education. The overall prevalence of self-reported diabetes was 1.5%; this increased to 1.9% and 2.5% for those with the highest levels of education and household wealth, respectively. In multilevel logistic regression models (adjusted for age, gender, religion, marital status, and place of residence) education (odds ratio 1.87 for higher education vs no education) and household wealth (odds ratio 4.04 for richest quintile vs poorest) were positively related to self-reported diabetes ( $P < 0.0001$ ). In a fully adjusted model including all socioeconomic variables and body mass index (BMI), household wealth emerged as positive and statistically significant with an odds ratio for self-reported diabetes of 2.58 (95% credible interval [CrI]: 1.99-3.40) for the richest quintile of household wealth versus the poorest. Nationally in India a one-quintile increase in household wealth was associated with an odds ratio of 1.31 (95% CrI: 1.20-1.42) for self-reported diabetes. This association was consistent across states with the relationship found to be positive in 97% (28 of 29 states) and statistically significant in 69% (20 of 29).

**Conclusions** We found that the highest socioeconomic status groups in India appear to be at greatest risk for type-2 diabetes. This raises important policy implications for

1  
2  
3  
4  
5  
6  
7  
8  
9  
10  
11  
12  
13  
14  
15  
16  
17  
18  
19  
20  
21  
22  
23  
24  
25  
26  
27  
28  
29  
30  
31  
32  
33  
34  
35  
36  
37  
38  
39  
40  
41  
42  
43  
44  
45  
46  
47  
48  
49  
50  
51  
52  
53  
54  
55  
56  
57  
58  
59  
60

addressing the disease burdens among the poor versus those among the non poor in the context of India, where greater than 40 percent of the population is living in poverty.

For peer review only

## ARTICLE SUMMARY

### Article Focus

- The relationship between socioeconomic factors and type-2 diabetes has not been previously studied for the whole of India and across states
- Our objective was to investigate associations between measures of socioeconomic status (defined as social caste, education, household wealth) and self-reported diabetes status in India
- In addition we explored geographic variation in the prevalence of diabetes between states and local areas in India and between-state variability in the SES-diabetes relationship

### Key messages

- The highest socioeconomic groups appear to be at greatest risk for diabetes in India; with the strength of the association consistent in size and magnitude across states
- There is substantial geographic heterogeneity in the prevalence of diabetes
- These findings raise important policy implications for in addressing the disease burdens among the poor versus those among the non poor in the context of India, where nearly half of the population is living in poverty.

### Strengths and Limitations

- The key strength of this study is the use of a large, nationally-representative survey to assess the socioeconomic and geographic patterning of diabetes across all of India. Limitations include the relatively younger age of the sample and assessment of diabetes status on the basis of self-reports.

## INTROCUCTION

The prevalence of type-2 diabetes in India has been investigated in numerous population based surveys conducted across a range of settings since the 1970s.[1-6] Despite multiple prevalence studies, no nationally representative studies exist which have considered the association between socioeconomic status (SES) and type-2 diabetes in India. In a review of 15 existing studies which have reported the prevalence of type-2 diabetes by SES and/or associations between SES and type-2 diabetes, all were found to have been based on local or regional samples and a majority were done in urban areas[4 6-19] (**Table 1**). It has been suggested that the prevalence of type-2 diabetes and other cardiovascular disease risk factors may increasingly become concentrated among low SES groups in India[20] and other low- and middle-income countries[21], although to date the empirical evidence from India in support of this hypothesis remains limited. The majority of studies reviewed in table 1 have provided evidence of a positive association between SES (defined as education, household wealth, social caste, or a composite of 2 or more markers) and diabetes among populations from selected geographic regions in India [6 11 17]; however the strength and consistency of this association across the whole of India has not previously been assessed.

Type-2 diabetes is the most common form of diabetes globally, accounting for greater than 85% of cases.[22] The incidence of type-2 diabetes is related to genetic and non-genetic components, with the latter being greatly influenced by modifiable risk factors such as obesity, diets low in fibre and high in trans fat, and physical inactivity.[23-24] Lifestyle behaviours are strongly patterned by SES [25], and may be mediators on the causal pathway between SES and the onset of type-2 diabetes.[26] In

1  
2  
3 high income countries, the SES-diabetes relationship appears to be negative, with the  
4 poor at greatest risk. For example, strong associations have been observed between  
5  
6 poverty, low education and type-2 diabetes among African American women [27-28],  
7  
8 and among White women and men in the United States.[29] Similarly, a study from  
9  
10 Canada described an inversely graded SES-diabetes association with an odds ratio of 1.9  
11  
12 for men (95% CI: 1.6-2.4) and 2.8 (95% CI: 2.2-3.4) for women for the lowest versus  
13  
14 highest income groups.[30] A recent meta-analysis of 23 case-control and cohort studies  
15  
16 and 43 measures of SES-diabetes association revealed an overall increased risk for type-2  
17  
18 diabetes for low SES groups based on education, occupation, and income.[31] The  
19  
20 strength of the association, however, was less consistent in low and middle income  
21  
22 countries (LMICs), and few studies have been conducted in these countries.  
23  
24  
25  
26  
27  
28

29 Concern has been raised over the anticipated rapid increase in type-2 diabetes  
30  
31 prevalence in India.[32-33] Evidence on the secular increases in diabetes prevalence in  
32  
33 India, however, have been limited to urban areas of Southern India[4 34-35], and have  
34  
35 focused on the mean rates of diabetes rather than how it is distributed in the population.  
36  
37 In this paper we address the need to comprehensively investigate the socioeconomic and  
38  
39 geographic distribution of type-2 diabetes in the Indian population using a large-scale  
40  
41 nationally representative survey. Specifically, we investigate the SES-diabetes  
42  
43 association through the SES markers of social caste, household wealth, and education. In  
44  
45 addition, we investigate the geographic distribution of the prevalence of diabetes across  
46  
47 states and local areas along with variability in the SES-diabetes association across states.  
48  
49  
50  
51  
52  
53  
54

## 55 **METHODS**

56  
57  
58  
59  
60

## Data source

We use data from the 3<sup>rd</sup> National Family Health Survey (NFHS), conducted in 29 states in India between November 2005 and August 2006.[36] NFHS-3 is a major national health survey in India which collected information on a range of indicators including reproductive health, nutritional status of adults and children, utilization of health care services, and blood testing for HIV prevalence. NFHS-3 covered all states in India, which comprise nearly 99% of the population, but excluded Union Territories. The survey was designed to provide estimates of key indicators (except HIV prevalence) for each state by urban and rural areas.

## Survey design

A uniform multistage sampling strategy was adopted in all states, with separate sampling in urban and rural areas.[37-38] In rural areas, a two stage sample was carried out using a list of villages from the 2001 census as the sampling frame. In the first stage, a stratified sample of villages was drawn with probability proportional to the size of the village. In the second stage, a random selection of households was drawn in each village from a complete list of households compiled during field visits carried out in each sampled village. In urban areas, a similar procedure was implemented beginning with a stratified random sample of municipal wards based on the 2001 census. Next, one census enumeration block (150-200 households) was selected from within wards using probability proportional to size. Finally, as in rural areas, field enumerators undertook a household listing operation in selected blocks and a random sample of households was made. In both rural and urban areas, 30 households were targeted for selection in each of the sampled units. The overall household response rate for NFHS-3 was 98%.[36]

1  
2  
3 All women aged 15-49 in selected households were invited to participate in the  
4 survey. In 22 states, men aged 15-54 in a random subsample of households drawn from  
5 each PSU (about 6 households per PSU) were eligible for the men's survey. In the  
6 remaining seven states (Andhra Pradesh, Karnataka, Maharashtra, Manipur, Tamil Nadu,  
7 Uttar Pradesh, and Nagaland) eligible men all in selected households were invited to  
8 participate. The additional men recruited in these states was for the purpose of HIV  
9 testing to provide reliable state level estimates of HIV prevalence in certain states.  
10 Interviews were conducted in 1 of the 18 Indian languages in the respondent's home and  
11 the response rates were 95% for women and 87% for men.[36] During interviews, the  
12 weights and heights of survey respondents were measured by trained field technicians  
13 using standardized measuring equipment designed for survey settings.[39]

14  
15  
16  
17  
18  
19  
20  
21  
22  
23  
24  
25  
26  
27  
28  
29  
30  
31  
32  
33  
34  
35  
36  
37  
38  
39  
40  
41  
42  
43  
44  
45  
46  
47  
48  
49  
50  
51  
52  
53  
54  
55  
56  
57  
58  
59  
60

In total NFHS-3 collected information from 109,041 households, 124,385 women from 15 to 49 years of age, and 74,369 men from 15 to 54 years of age. We restricted our analyses to adults aged 18 years and older and non-pregnant women (n=171,207). Respondents who did not report or know their diabetes status (n= 2,373) or with incomplete information for any of the independent variables considered in the analysis (marital status, religion, caste, education, household wealth) were excluded (n=699). Main analyses were conducted on a sample of 168,135 respondents, (65,255 men and 102,880 women). Additional analyses considering body mass index (BMI) were restricted to a sample of 158,936 due to missing and/or implausible values for height and/or weight. **Figure 1** provides a flow diagram detailing the NFHS sample, exclusions, and final analytic sample sizes.

### **Outcome and independent variables**

1  
2  
3  
4  
5  
6  
7  
8  
9  
10  
11  
12  
13  
14  
15  
16  
17  
18  
19  
20  
21  
22  
23  
24  
25  
26  
27  
28  
29  
30  
31  
32  
33  
34  
35  
36  
37  
38  
39  
40  
41  
42

The primary outcome was diabetes, assessed on the basis of self-reports by survey respondents. Markers of socioeconomic status were social caste, household wealth, and education. Social caste was reported by the household head. The categories were Other Caste, Scheduled caste, Scheduled tribe, Other Backward Class, and No Caste. Other Caste is a heterogeneous group that is traditionally viewed as having higher social status. Scheduled castes and scheduled tribes are considered lower, socially marginalized groups in India.[40] Household wealth was defined by an index based on indicators of asset ownership and housing characteristics.[41] This index has been developed and validated in a number of countries to be a robust measure of wealth and has been found to be consistent with measures of income and expenditure.[42] Briefly, the measure was constructed as follows. Information on 33 indicators of housing characteristics (e.g., type of windows and flooring, water and sanitation facilities) and assets (e.g., ownership of home, car, computer, mobile phone) were weighted and combined with weights derived from a principal component analysis procedure.[36] The resulting variable was standardized to a mean of 0 and standard deviation of 1 and using this index the household population was divided into fifths from poorest to richest. Education was categorized in four levels as no education, primary, secondary, or higher education.

43  
44  
45  
46  
47  
48  
49  
50  
51  
52  
53  
54  
55  
56  
57  
58  
59  
60

Background characteristics included age, gender, religion, marital status, place of residence, and BMI. Age was defined in 10 year categories and centred about its mean (32 years) in regression models. Gender was based on self-report. Religion was categorized as Hindu, Muslim, Sikh, Buddhist, or other religion. Marital status was defined as single, married, widowed, or separated. Place of residence (rural or urban) was defined according to the 2001 Census. BMI (in  $\text{kg}/\text{m}^2$ ; weight in kilograms divided



1  
2  
3 by the square of height in meters) was calculated for all survey respondents with valid  
4 measurements for weight and height. BMI was classified according to the following  
5  
6 categories based on risk of type 2 diabetes and cardiovascular disease in Asian  
7  
8 populations; less than 18.5 kg/m<sup>2</sup> (underweight); 18.5-22.9 kg/m<sup>2</sup> (acceptable risk); 23-  
9  
10 27.4 kg/m<sup>2</sup> (increased risk); and 27.5 kg/m<sup>2</sup> or greater (high risk).[43]  
11  
12

### 13 14 15 **Analysis**

16  
17 To account for the complex survey design, we employed multilevel logistic  
18 regression to model the probability of diabetes.[44] A three-level model was specified  
19  
20 with a binary response (y, diabetes or not) for individual *i* in local area (village or census  
21  
22 block primary sampling units) *j* in state *k*. The outcome diabetes, Pr( $y_{ijk} = 1$ ), was  
23  
24 assumed to be binomially distributed  $y_{ijk} \sim \text{Binomial}(1, \pi_{ijk})$  with probability  $\pi_{ijk}$  related  
25  
26 to the set of independent variables *X* and a random effect for each level by a logit link  
27  
28 function:  
29  
30  
31  
32

$$33 \text{Logit}(\pi_{ijk}) = \beta_0 + \beta X_{ijk} + v_{0k} + u_{0jk} \cdot \text{ (Equation 1)}$$

34  
35 The right hand side of the equation consists of the fixed part linear predictor ( $\beta_0 + \beta X_{ijk}$ )  
36  
37 and random intercepts attributable to states ( $v_{0k}$ ) and local areas ( $u_{0jk}$ ). The intercept,  
38  
39  $\beta_0$  represents the log odds of diabetes in the reference group, and the  $\beta$ -coefficients  
40  
41 represent the differential in the log odds of diabetes compared to the reference group  
42  
43 defined for each independent variable. Coefficients were exponentiated and presented as  
44  
45 odds ratios for interpretation. The random intercepts are assumed to be independently  
46  
47 and identically distributed and have variances estimated for states ( $\sigma_v^2$ ) and local areas  
48  
49 ( $\sigma_u^2$ ).[45] The variance parameters quantify heterogeneity in the log odds of diabetes at  
50  
51  
52  
53  
54  
55  
56  
57  
58  
59  
60

1  
2  
3 each level, after taking into account individual characteristics and place of residence in  
4  
5 the fixed part. We expressed the variances at each level as a percentage of their  
6  
7 contribution to the total variance from an initial model adjusting for age and gender only  
8  
9 and from a final model accounting for all covariates. We specified a sequence of six  
10  
11 models during analyses. In the first three models, one SES marker (social caste,  
12  
13 household wealth, education) was added to a model which adjusted for background  
14  
15 characteristics (age, gender, religion, and place of residence). In the fourth mutually  
16  
17 adjusted model, all SES markers were included along with background characteristics  
18  
19 from the previous models. In the fifth model, BMI was included with markers of SES and  
20  
21 background characteristics from model 4. In the sixth model, we also tested whether the  
22  
23 association between household wealth varied across states in terms of strength or  
24  
25 direction, given that different states vary tremendously by levels of economic  
26  
27 development and could be considered at different levels of epidemiological transition. In  
28  
29 order to test this between state variability we expanded Equation 1 to allow the slope of  
30  
31 household wealth to vary across states:  
32  
33

$$\text{Logit}(\pi_{ijk}) = \beta_0 + \beta_{1k} \text{wealth}_{ijk} + \beta X_{ijk} + v_{0k} + v_{1k} + u_{0jk} . \text{ (Equation 2)}$$

34  
35 The key feature of Equation 2 is that the effect of wealth on self-reported diabetes in state  
36  
37  $k$  consists of the overall average effect across all states ( $\beta_1$ ), plus a state-specific ( $v_{1k}$ )  
38  
39 differential in this effect. We summarized and presented the results of this model as the  
40  
41 odds ratio for self-reported diabetes overall in India and for each state given a 1-quintile  
42  
43 increase in household wealth and conditional on all covariates from model 5. Additional  
44  
45 analyses were carried out separately for male and female samples using an identical  
46  
47 sequence of models (with the exclusion of gender as a background characteristic).  
48  
49  
50  
51  
52  
53  
54  
55  
56  
57  
58  
59  
60

1  
2  
3 Estimation of models was done using Markov Chain Monte Carlo (MCMC) simulation  
4  
5 and the statistical software *MLwiN*.<sup>[46-47]</sup>  
6  
7  
8  
9

## 10 RESULTS

11  
12 Characteristics of survey respondents by their self-reported diabetes status are  
13 given in **Table 2**. The overall prevalence of diabetes in this sample was 1.5% and this  
14 was higher in urban areas and among men (diabetes prevalence 2.0 % in urban v 1.0% in  
15 rural; 1.8% in men v 1.3% in women). Diabetes prevalence increased with age (7.5% in  
16 50-54y v 0.3% in 18-29y), education (1.9% in higher v 1.0% in no education), household  
17 wealth (2.5% in richest v 0.4% in poorest), and BMI (4.8% in 27.5+ kg/m<sup>2</sup> v 0.6% in  
18 <18.5 kg/m<sup>2</sup>). At the state level, the prevalence of diabetes varied between 0.3% in  
19 Rajasthan and 3.3% in Kerala and was generally higher in Southern and Eastern states  
20  
21  
22  
23  
24  
25  
26  
27  
28  
29  
30  
31  
32  
33  
34  
35  
36  
37  
38  
39  
40  
41  
42  
43  
44  
45  
46  
47  
48  
49  
50  
51  
52  
53  
54  
55  
56  
57  
58  
59  
60  
(**Figure 2**).

In separate models that adjusted for age, marital status, religion, and place of residence, statistically significant associations were observed between SES and self-reported diabetes for each of the primary markers of SES in this study: social caste, household wealth, and education. Compared to the other caste group, scheduled casts, scheduled tribes, and other backward classes had reduced odds of having diabetes with odds ratios of 0.81 (95% CI: 0.71-0.94), 0.57 (95% CI: 0.46-0.70), and 0.84 (95% CI: 0.75-0.94), respectively (**Table 3**, Models 1-3). Education showed a graded relation with diabetes and an odds ratio of 1.87 (95% CI: 1.61-2.18) for those with higher education versus those with no education. Household wealth showed a graded association with

1  
2  
3 diabetes with individuals from the richest households having an odds ratio for diabetes of  
4  
5 4.04 (95% CI: 3.08-5.30) compared to those from the poorest households.  
6  
7

8 The effects of social caste and education were attenuated in the mutually adjusted  
9  
10 model (model 4), suggesting that their independent effects on self-reported diabetes were  
11  
12 at least partially mediated by the inclusion of household in this model. The reduced odds  
13  
14 for diabetes remained consistent for scheduled tribes versus other caste groups (OR 0.72,  
15  
16 95% CI: 0.58-0.90) as did an increased odds for those with secondary education versus  
17  
18 no education (OR 1.18, 95% CI: 1.04-1.35), however the graded relation with education  
19  
20 was less consistent. In separate mutually adjusted models that were stratified by gender,  
21  
22 education showed a graded association in men although it was not statistically significant  
23  
24 with the odds ratio for diabetes men found to be 1.27 (95% CI: 0.98-1.70) for men with  
25  
26 higher versus no education (**Supplemental Table 1**). Among women, those with  
27  
28 secondary education continued to show an increased odds of self-reported diabetes  
29  
30 compared to those with no education (OR 1.28, 95% CI: 1.08-1.50). Overall, the strong  
31  
32 and graded relation between household wealth and diabetes remained consistent in model  
33  
34 4 with an odds ratio for diabetes of 3.65 (95% CI: 2.83, 4.78) for the richest versus the  
35  
36 poorest groups; similar associations were found in the gender-specific models  
37  
38 (Supplemental Table 1). Type-2 diabetes is strongly influenced by body weight.[48-50]  
39  
40 Therefore, BMI was added to model 5 to control for potential confounding of the SES-  
41  
42 diabetes relationship in this sample. In addition, BMI was added separately in this model  
43  
44 because its inclusion resulted in the reduction of sample size by ~5% due to missing  
45  
46 values for BMI. The odds ratios for caste and education remained consistent between  
47  
48 the mutually adjusted model and final model which included BMI. The odds ratios for  
49  
50  
51  
52  
53  
54  
55  
56  
57  
58  
59  
60

1  
2  
3 household wealth were further attenuated in the final model, however the positive graded  
4  
5 association remained statistically significant with an adjusted odds ratio for those in the  
6  
7 richest compared to the poorest households of 2.58 (95% CI: 1.99-3.40).  
8  
9

10  
11 Our analyses revealed dramatic variation in the prevalence of diabetes between  
12  
13 states and local areas in India (**Table 4**). In an initial multilevel model adjusted for age  
14  
15 and gender, states and local areas (defined as villages in rural areas and census blocks in  
16  
17 urban areas) contributed 5.9% and 10.8%, respectively, to the total variation in diabetes.  
18  
19 The addition of socioeconomic and demographic characteristics along with BMI to the  
20  
21 model reduced the variance in diabetes attributed to local areas by 41% to 6.4% but the  
22  
23 variation attributed to states was relatively unchanged at 5.4%.  
24  
25  
26

27  
28 Overall in India, the log odds for diabetes for the reference category (a 32 year old  
29  
30 married women, with no education, BMI <18.5 kg/m<sup>2</sup>, belonging to the other caste group,  
31  
32 in the poorest fifth of households, and living in a rural area) was -6.13 or a 0.22%  
33  
34 probability of diabetes. Compared to this national reference point, being a resident of  
35  
36 several Southern and Northeastern states was associated with a statistically significant  
37  
38 increase in the odds of diabetes (**Figure 3**). The odds ratios for self-reported diabetes  
39  
40 these states were: 2.29 (Tripura), 1.69 (Tamil Nadu), 1.69 (Kerala), 1.71 (Goa), 1.49  
41  
42 (Andhra Pradesh), and 1.56 (West Bengal). In contrast being resident of the states of  
43  
44 Rajasthan, Jammu & Kashmir, Uttar Pradesh, Punjab, Madhya Pradesh, and Assam in  
45  
46 Northern and Central India was associated with a statistically significant decrease (OR <  
47  
48 1.0) in the odds of self-reported diabetes.  
49  
50  
51  
52

53  
54 In order to assess the variability in the SES-diabetes association across states in  
55  
56 India, a final model (model 6) was specified to allow the odds ratio for diabetes for a one-  
57  
58  
59  
60

1  
2  
3 quintile increase in household wealth to vary across states. In this model, the overall  
4  
5 odds ratio for diabetes in India for a one-quintile increase in household wealth was 1.31  
6  
7 (95% CI: 1.20-1.42) (**Figure 4**). In 15 states, the association was stronger than the  
8  
9 national average; varying between an odds ratio of 1.33 in Rajasthan and 1.55 in Jammu  
10  
11 & Kashmir. Although the association was less than the national average in 14 states, it  
12  
13 was found to be positive in 28/29 (97%) states and statistically significant in 20/29  
14  
15 (69%). Only in West Bengal was an inverse association observed, but it was not  
16  
17 statistically significant (OR 0.95 95% CI: 0.83-1.09). Odds ratios and 95% CI for the  
18  
19 overall association and across all states are presented in **Supplemental Table 2**. In  
20  
21 summary, the association between household wealth and self-reported diabetes was  
22  
23 consistent across the states both in direction and magnitude.  
24  
25  
26  
27  
28

29 We conducted several sensitivity analyses to assess the consistency of our  
30  
31 findings. First, we examined whether the observed associations were related to  
32  
33 respondents' awareness and knowledge about diabetes. To do so, we considered  
34  
35 responses to the question, "Do you have diabetes?" as a categorical variable, comparing  
36  
37 "yes" (diabetic) and "don't know" (unknown) versus "no" (non-diabetic) across the same  
38  
39 set of independent variables using a multinomial logistic model. Associations between  
40  
41 SES variables and positive reports of diabetes from this model, which included the  
42  
43 possibility that respondents were unaware of their diabetes status, were nearly identical to  
44  
45 findings from the logistic model which excluded those with unknown diabetes status  
46  
47 (**Supplemental Table 3**). The multinomial model also revealed that the richer and more  
48  
49 highly educated respondents were less likely to report unknown status compared to non-  
50  
51 diabetic. In addition, we examined BMI across the three categories of diabetes status  
52  
53  
54  
55  
56  
57  
58  
59  
60

1  
2  
3  
4  
5  
6  
7  
8  
9  
10  
11  
12  
13  
14  
15  
16  
17  
18  
19  
20  
21  
22  
23  
24  
25  
26  
27  
28  
29  
30  
31  
32  
33  
34  
35  
36  
37  
38  
39  
40  
41  
42  
43  
44  
45  
46  
47  
48  
49  
50  
51  
52  
53  
54  
55  
56  
57  
58  
59  
60

(Figure 5). This revealed that those with unknown diabetes had the lowest BMI (mean 20.9, SD 3.7) which was largely consistent with the non-diabetic group (mean 21.1, SD 3.9) and substantially lower than those with self-reported diabetes (mean 24.4, SD 4.9). Finally, we examined interactions between socioeconomic variables (caste, education, wealth) and diabetes by residential location. Tests of these interactions were not statistically significant (P=0.20 for caste; P=0.72 for education; P=0.66 for wealth).

## DISCUSSION

In this study, we have three key findings. First, measures of SES were positively associated with self-reported diabetes in the NFHS-3. Although the observed effects of caste and education were largely attenuated in fully adjusted models, the effect of household wealth remained positive, graded and statistically significant even after controlling for BMI. Second, we observed a large variation in the prevalence of diabetes between local areas and States in India. A few Southern and northeastern states were associated with a higher risk for reporting diabetes while several northern and central states were at lower risk after adjusting for individual characteristics and place of residence. Lastly, the observed association between household wealth and self-reported diabetes was consistent, positive, and statistically significant across a majority of states in India.

There are a few limitations to our study. First, the outcome was defined on the basis of self-reported diabetes, although interviews were conducted in person using a standardized instrument. Previous research has shown good agreement for self-reported diabetes when compared to medical records in a US population [51], and that that self-

1  
2  
3 reported health conditions demonstrate the expected relationship with SES in India.[52]  
4  
5 In addition, our sensitivity analyses considering respondents who reported “unknown” for  
6  
7 diabetes status were nearly identical to the main analyses. We did find, however,  
8  
9 evidence that higher SES groups were less likely to report “did not know” as compared to  
10  
11 “no”, which has been suggested previously on studies using self-reports of diabetes status  
12  
13 in India.[6] However, the unknown group was more similar in terms of BMI, education,  
14  
15 and wealth to the non-diabetic rather than diabetic group. In addition, our findings of  
16  
17 positive SES-diabetes associations were consistent with several studies identified in our  
18  
19 literature review which used blood glucose measurements for the assessment of diabetes  
20  
21 status (summarized in Table 1). Lastly, although our sample was relatively young (<55 y  
22  
23 for men and <50 y for women) it is representative of the young population of profile of  
24  
25 India; 84% of the Indian adult population (18-69 y) and 47% of the total Indian  
26  
27 population at all ages fall within the ages covered by this study.[53] Our study does  
28  
29 exclude approximately 12% of the Indian population (women over the age of 50 and men  
30  
31 over the age of 55) due to the sample design of the NFHS. The prevalence of diabetes  
32  
33 increases with age and whether a similar SES-diabetes relationship exists among middle  
34  
35 and older age groups in all parts India is not clear, although our findings are consistent  
36  
37 with previous studies which have included older ages.  
38  
39  
40  
41  
42  
43  
44  
45

46 Our findings of positive SES-diabetes associations are consistent with previous  
47  
48 studies done in different parts of India. For example, an analysis of rural participants  
49  
50 from the Indian Migration Study, which sampled primarily from four large states in the  
51  
52 north, centre, and south of India [17], identified a positive SES-diabetes gradient among  
53  
54 men (8.0% prevalence in high SES group v 1.8% in low SES group), and a weaker  
55  
56  
57  
58  
59  
60



1  
2  
3 positive SES-diabetes association that was not statistically significant among women  
4 (5.1% v 3.9%). In addition, a study done in an urban setting in Madras (Chennai) found  
5  
6 an odds ratio for diabetes of 2.2 (95% confidence interval [CI]: 1.7-2.7) for high v low  
7  
8  
9  
10  
11  
12  
13  
14  
15  
16  
17  
18  
19  
20  
21  
22  
23  
24  
25  
26  
27  
28  
29  
30  
31  
32  
33  
34  
35  
36  
37  
38  
39  
40  
41  
42  
43  
44  
45  
46  
47  
48  
49  
50  
51  
52  
53  
54  
55  
56  
57  
58  
59  
60

positive SES-diabetes association that was not statistically significant among women (5.1% v 3.9%). In addition, a study done in an urban setting in Madras (Chennai) found an odds ratio for diabetes of 2.2 (95% confidence interval [CI]: 1.7-2.7) for high v low SES groups.[11] One larger study conducted in urban and rural surveillance locations in Northern, Southern, Eastern, and Western/Central India identified an odds ratio of 3.0 (95% CI: 2.5-3.7) for self-reported diabetes for those with graduate level education versus those without formal schooling.[6] Importantly, these studies were limited to selected geographical areas or cities in India. Our study has added to this literature using a national population health survey with good coverage in rural areas across India.

Previous research in India has identified a strong positive relation between SES and BMI among women and men in India. [54-56] These studies are important because they have used similar markers of SES in the Indian context along with an objectively defined outcome (height and weight were measured in NFHS and not self-reported). BMI (along with other measures of body weight) is an important risk factor for the development of type 2 diabetes. [48 50 57] Therefore, the consistency of our findings of a positive SES-diabetes association after controlling for BMI is encouraging. If BMI is part of the causal pathway between SES and diabetes, attenuation in the effect size for markers of SES would be expected. The graded and positive relation between household wealth and diabetes after accounting for BMI suggests that there are additional effects of household wealth on diabetes that are not mediated by BMI. The effects of social caste and education were largely attenuated after the inclusion of household wealth and prior to the inclusion of BMI. Household wealth was the strongest socioeconomic factor associated with self-reported diabetes, suggesting that social and behavioural changes

1  
2  
3 associated with diabetes in India may be more closely related to increasing wealth and/or  
4  
5 standard of living than educational attainment.  
6  
7

8 When compared to other studies in India, the overall prevalence of diabetes in the  
9  
10 NFHS-3 was not high. This may have resulted from a combination of using self-reports  
11  
12 of diabetes, the younger age of the NFHS-3 target population, and sampling from the  
13  
14 general population which included a high proportion of respondents in rural areas.  
15

16  
17 Among individuals over 30 years of age, the prevalence was 2.5% (3.0 % in men and  
18  
19 2.2% in women). Other studies using in rural India using similar age groups and blood  
20  
21 measurements have reported diabetes prevalence of 4% and a study from rural Andhra  
22  
23 Pradesh found a prevalence of 12% based on combination self-report and blood  
24  
25 measurements.[17 58]  
26  
27

28  
29 The current national estimate for diabetes prevalence in India is about 7% of the  
30  
31 adult population aged 20-79. This estimate is based on 3 relatively recent and larger  
32  
33 scale studies using a combination of oral glucose tolerance testing and self-reports of  
34  
35 diabetes.[4-6] There continues to be considerable uncertainty in estimates of diabetes for  
36  
37 the whole of India due to the limited study locations (with a focus on urban areas), wide  
38  
39 variation in survey sampling methodology, differences in diabetes diagnostic criteria, and  
40  
41 age groups studied. These differences in study design have hindered direct comparison  
42  
43 of the prevalence between studies, across regions and over time. The NFHS-3 provides  
44  
45 an important benchmark because it is the first nationally-representative survey of  
46  
47 diabetes in India. Even if the prevalence estimates of diabetes have been underestimated  
48  
49 in the NFHS-3, the observed SES-diabetes associations are plausible and important.  
50  
51  
52  
53  
54  
55  
56  
57  
58  
59  
60  
61  
62  
63  
64  
65  
66  
67  
68  
69  
70  
71  
72  
73  
74  
75  
76  
77  
78  
79  
80  
81  
82  
83  
84  
85  
86  
87  
88  
89  
90  
91  
92  
93  
94  
95  
96  
97  
98  
99  
100  
101  
102  
103  
104  
105  
106  
107  
108  
109  
110  
111  
112  
113  
114  
115  
116  
117  
118  
119  
120  
121  
122  
123  
124  
125  
126  
127  
128  
129  
130  
131  
132  
133  
134  
135  
136  
137  
138  
139  
140  
141  
142  
143  
144  
145  
146  
147  
148  
149  
150  
151  
152  
153  
154  
155  
156  
157  
158  
159  
160  
161  
162  
163  
164  
165  
166  
167  
168  
169  
170  
171  
172  
173  
174  
175  
176  
177  
178  
179  
180  
181  
182  
183  
184  
185  
186  
187  
188  
189  
190  
191  
192  
193  
194  
195  
196  
197  
198  
199  
200  
201  
202  
203  
204  
205  
206  
207  
208  
209  
210  
211  
212  
213  
214  
215  
216  
217  
218  
219  
220  
221  
222  
223  
224  
225  
226  
227  
228  
229  
230  
231  
232  
233  
234  
235  
236  
237  
238  
239  
240  
241  
242  
243  
244  
245  
246  
247  
248  
249  
250  
251  
252  
253  
254  
255  
256  
257  
258  
259  
260  
261  
262  
263  
264  
265  
266  
267  
268  
269  
270  
271  
272  
273  
274  
275  
276  
277  
278  
279  
280  
281  
282  
283  
284  
285  
286  
287  
288  
289  
290  
291  
292  
293  
294  
295  
296  
297  
298  
299  
300  
301  
302  
303  
304  
305  
306  
307  
308  
309  
310  
311  
312  
313  
314  
315  
316  
317  
318  
319  
320  
321  
322  
323  
324  
325  
326  
327  
328  
329  
330  
331  
332  
333  
334  
335  
336  
337  
338  
339  
340  
341  
342  
343  
344  
345  
346  
347  
348  
349  
350  
351  
352  
353  
354  
355  
356  
357  
358  
359  
360  
361  
362  
363  
364  
365  
366  
367  
368  
369  
370  
371  
372  
373  
374  
375  
376  
377  
378  
379  
380  
381  
382  
383  
384  
385  
386  
387  
388  
389  
390  
391  
392  
393  
394  
395  
396  
397  
398  
399  
400  
401  
402  
403  
404  
405  
406  
407  
408  
409  
410  
411  
412  
413  
414  
415  
416  
417  
418  
419  
420  
421  
422  
423  
424  
425  
426  
427  
428  
429  
430  
431  
432  
433  
434  
435  
436  
437  
438  
439  
440  
441  
442  
443  
444  
445  
446  
447  
448  
449  
450  
451  
452  
453  
454  
455  
456  
457  
458  
459  
460  
461  
462  
463  
464  
465  
466  
467  
468  
469  
470  
471  
472  
473  
474  
475  
476  
477  
478  
479  
480  
481  
482  
483  
484  
485  
486  
487  
488  
489  
490  
491  
492  
493  
494  
495  
496  
497  
498  
499  
500  
501  
502  
503  
504  
505  
506  
507  
508  
509  
510  
511  
512  
513  
514  
515  
516  
517  
518  
519  
520  
521  
522  
523  
524  
525  
526  
527  
528  
529  
530  
531  
532  
533  
534  
535  
536  
537  
538  
539  
540  
541  
542  
543  
544  
545  
546  
547  
548  
549  
550  
551  
552  
553  
554  
555  
556  
557  
558  
559  
560  
561  
562  
563  
564  
565  
566  
567  
568  
569  
570  
571  
572  
573  
574  
575  
576  
577  
578  
579  
580  
581  
582  
583  
584  
585  
586  
587  
588  
589  
590  
591  
592  
593  
594  
595  
596  
597  
598  
599  
600  
601  
602  
603  
604  
605  
606  
607  
608  
609  
610  
611  
612  
613  
614  
615  
616  
617  
618  
619  
620  
621  
622  
623  
624  
625  
626  
627  
628  
629  
630  
631  
632  
633  
634  
635  
636  
637  
638  
639  
640  
641  
642  
643  
644  
645  
646  
647  
648  
649  
650  
651  
652  
653  
654  
655  
656  
657  
658  
659  
660  
661  
662  
663  
664  
665  
666  
667  
668  
669  
670  
671  
672  
673  
674  
675  
676  
677  
678  
679  
680  
681  
682  
683  
684  
685  
686  
687  
688  
689  
690  
691  
692  
693  
694  
695  
696  
697  
698  
699  
700  
701  
702  
703  
704  
705  
706  
707  
708  
709  
710  
711  
712  
713  
714  
715  
716  
717  
718  
719  
720  
721  
722  
723  
724  
725  
726  
727  
728  
729  
730  
731  
732  
733  
734  
735  
736  
737  
738  
739  
740  
741  
742  
743  
744  
745  
746  
747  
748  
749  
750  
751  
752  
753  
754  
755  
756  
757  
758  
759  
760  
761  
762  
763  
764  
765  
766  
767  
768  
769  
770  
771  
772  
773  
774  
775  
776  
777  
778  
779  
780  
781  
782  
783  
784  
785  
786  
787  
788  
789  
790  
791  
792  
793  
794  
795  
796  
797  
798  
799  
800  
801  
802  
803  
804  
805  
806  
807  
808  
809  
810  
811  
812  
813  
814  
815  
816  
817  
818  
819  
820  
821  
822  
823  
824  
825  
826  
827  
828  
829  
830  
831  
832  
833  
834  
835  
836  
837  
838  
839  
840  
841  
842  
843  
844  
845  
846  
847  
848  
849  
850  
851  
852  
853  
854  
855  
856  
857  
858  
859  
860  
861  
862  
863  
864  
865  
866  
867  
868  
869  
870  
871  
872  
873  
874  
875  
876  
877  
878  
879  
880  
881  
882  
883  
884  
885  
886  
887  
888  
889  
890  
891  
892  
893  
894  
895  
896  
897  
898  
899  
900  
901  
902  
903  
904  
905  
906  
907  
908  
909  
910  
911  
912  
913  
914  
915  
916  
917  
918  
919  
920  
921  
922  
923  
924  
925  
926  
927  
928  
929  
930  
931  
932  
933  
934  
935  
936  
937  
938  
939  
940  
941  
942  
943  
944  
945  
946  
947  
948  
949  
950  
951  
952  
953  
954  
955  
956  
957  
958  
959  
960  
961  
962  
963  
964  
965  
966  
967  
968  
969  
970  
971  
972  
973  
974  
975  
976  
977  
978  
979  
980  
981  
982  
983  
984  
985  
986  
987  
988  
989  
990  
991  
992  
993  
994  
995  
996  
997  
998  
999  
1000

1  
2  
3 markers, which may be a key determinant of diabetes. Further large-scale population-  
4  
5 based surveys can be strengthened by using simple finger-prick blood glucose  
6  
7 measurements in addition to self-reports.  
8  
9

10  
11 There has been considerable concern over the rising prevalence of diabetes in  
12  
13 India, especially with studies on migrant Indian populations suggesting that South Asians  
14  
15 may be more susceptible to the disease. In light of current findings, it appears that, at  
16  
17 present, the more well-off segments of the Indian population are at greatest risk. This  
18  
19 poses concerns on how to appropriately balance priorities to address the disease burden  
20  
21 that afflicts the non poor versus the poor in the context of India where greater than 40%  
22  
23 of the population continue to live in extreme poverty on less than \$1.25 per day.[59]  
24  
25  
26  
27  
28

## 29 **ACKNOWLEDGEMENTS**

30  
31 SVS and DJC planned the study. DJC conducted statistical analyses and drafted the  
32  
33 manuscript with supervision from SVS. Both authors participated in interpretation of the  
34  
35 results and critical revisions of the manuscript.  
36  
37

38  
39 The NFHS data are available through the Measure DHS project at [www.measuredhs.com](http://www.measuredhs.com).  
40  
41  
42  
43  
44  
45  
46  
47  
48  
49  
50  
51  
52  
53  
54  
55  
56  
57  
58  
59  
60

## REFERENCES

1. Rao KS, Mukherjee NR, Rao KV. A survey of diabetes mellitus in a rural population of India. *Diabetes* 1972;**21**:1192-6.
2. Gupta OP, Joshi MH, Dave SK. Prevalence of diabetes in India. *Adv Metab Disord* 1978;**9**:147-65.
3. Ahuja MM. Recent contributions to the epidemiology of diabetes mellitus in India. *Int J Diab Developing Countires* 1991;**11**:5-9.
4. Ramachandran A, Snehalatha C, Kapur A, et al. High prevalence of diabetes and impaired glucose tolerance in India: National Urban Diabetes Survey. *Diabetologia* 2001;**44**:1094-101.
5. Sadikot SM, Nigam A, Das S, et al. The burden of diabetes and impaired glucose tolerance in India using the WHO 1999 criteria: prevalence of diabetes in India study (PODIS). *Diabetes Res Clin Pract* 2004;**66**:301-7.
6. Mohan V, Mathur P, Deepa R, et al. Urban rural differences in prevalence of self-reported diabetes in India--the WHO-ICMR Indian NCD risk factor surveillance. *Diabetes Res Clin Pract* 2008;**80**:159-68.
7. Singh RB, Sharma JP, Rastogi V, et al. Social class and coronary disease in rural population of north India. The Indian Social Class and Heart Survey. *Eur Heart J* 1997;**18**:588-95.
8. Singh RB, Niaz MA, Thakur AS, et al. Social class and coronary artery disease in a urban population of North India in the Indian Lifestyle and Heart Study. *Int J Cardiol* 1998;**64**:195-203.
9. Singh RB, Bajaj S, Niaz MA, et al. Prevalence of type 2 diabetes mellitus and risk of hypertension and coronary artery disease in rural and urban population with low rates of obesity. *Int J Cardiol* 1998;**66**:65-72.
10. Singh RB, Beegom R, Mehta AS, et al. Social class, coronary risk factors and undernutrition, a double burden of diseases, in women during transition, in five Indian cities. *Int J Cardiol* 1999;**69**:139-47.
11. Ramachandran A, Snehalatha C, Vijay V, et al. Impact of poverty on the prevalence of diabetes and its complications in urban southern India. *Diabet Med* 2002;**19**:130-5.
12. Gupta R, Gupta VP, Sarna M, et al. Serial epidemiological surveys in an urban Indian population demonstrate increasing coronary risk factors among the lower socioeconomic strata. *J Assoc Physicians India* 2003;**51**:470-7.
13. Reddy KS, Prabhakaran D, Jeemon P, et al. Educational status and cardiovascular risk profile in Indians. *Proc Natl Acad Sci U S A* 2007;**104**:16263-8.
14. Ajay VS, Prabhakaran D, Jeemon P, et al. Prevalence and determinants of diabetes mellitus in the Indian industrial population. *Diabetic Medicine* 2008;**25**:1187-94.
15. Vijayakumar G, Arun R, Kutty VR. High prevalence of type 2 diabetes mellitus and other metabolic disorders in rural Central Kerala. *J Assoc Physicians India* 2009;**57**:563-7.
16. Gupta R, Kaul V, Agrawal A, et al. Cardiovascular risk according to educational status in India. *Prev Med* 2010;**51**:408-11.

17. Kinra S, Bowen LJ, Lyngdoh T, et al. Sociodemographic patterning of non-communicable disease risk factors in rural India: a cross sectional study. *BMJ* 2010;**341**:c4974.
18. Samuel P, Antonisamy B, Raghupathy P, et al. Socio-economic status and cardiovascular risk factors in rural and urban areas of Vellore, Tamilnadu, South India. *Int J Epidemiol* 2012.
19. Zaman MJ, Patel A, Jan S, et al. Socio-economic distribution of cardiovascular risk factors and knowledge in rural India. *Int J Epidemiol* 2012.
20. Jeemon P, Reddy KS. Social determinants of cardiovascular disease outcomes in Indians. *Indian J Med Res* 2010;**132**:617-22.
21. Beaglehole R, Bonita R, Alleyne G, et al. UN High-Level Meeting on Non-Communicable Diseases: addressing four questions. *Lancet* 2011;**378**:449-55.
22. World Health Organization. Prevention of diabetes mellitus. Report of a WHO Study Group. WHO Technical Report Series 844. Geneva: World Health Organization, 1994.
23. Hu FB, Manson JE, Stampfer MJ, et al. Diet, lifestyle, and the risk of type 2 diabetes mellitus in women. *N Engl J Med* 2001;**345**:790-7.
24. Psaltopoulou T, Ilias I, Alevizaki M. The role of diet and lifestyle in primary, secondary, and tertiary diabetes prevention: a review of meta-analyses. *Rev Diabet Stud* 2010;**7**:26-35.
25. Adler NE, Newman K. Socioeconomic disparities in health: pathways and policies. *Health Aff (Millwood)* 2002;**21**:60-76.
26. Brown AF, Ettner SL, Piette J, et al. Socioeconomic position and health among persons with diabetes mellitus: a conceptual framework and review of the literature. *Epidemiol Rev* 2004;**26**:63-77.
27. Sims M, Diez Roux AV, Boykin S, et al. The socioeconomic gradient of diabetes prevalence, awareness, treatment, and control among african americans in the jackson heart study. *Ann Epidemiol* 2011;**21**:892-8.
28. Krishnan S, Cozier YC, Rosenberg L, et al. Socioeconomic status and incidence of type 2 diabetes: results from the Black Women's Health Study. *Am J Epidemiol* 2010;**171**:564-70.
29. Robbins JM, Vaccarino V, Zhang H, et al. Socioeconomic status and type 2 diabetes in African American and non-Hispanic white women and men: evidence from the Third National Health and Nutrition Examination Survey. *Am J Public Health* 2001;**91**:76-83.
30. Dinca-Panaitescu S, Dinca-Panaitescu M, Bryant T, Daiski I, Pilkington B, Raphael D. Diabetes prevalence and income: Results of the Canadian Community Health Survey. *Health Policy* 2011;**99**:116-23.
31. Agardh E, Allebeck P, Hallqvist J, et al. Type 2 diabetes incidence and socio-economic position: a systematic review and meta-analysis. *Int J Epidemiol* 2011;**40**:804-18.
32. Mohan V, Sandeep S, Deepa R, et al. Epidemiology of type 2 diabetes: Indian scenario. *Indian J Med Res* 2007;**125**:217-30.
33. Shaw JE, Sicree RA, Zimmet PZ. Global estimates of the prevalence of diabetes for 2010 and 2030. *Diabetes Res Clin Pract* 2010;**87**:4-14.

- 1
  - 2
  - 3
  - 4
  - 5
  - 6
  - 7
  - 8
  - 9
  - 10
  - 11
  - 12
  - 13
  - 14
  - 15
  - 16
  - 17
  - 18
  - 19
  - 20
  - 21
  - 22
  - 23
  - 24
  - 25
  - 26
  - 27
  - 28
  - 29
  - 30
  - 31
  - 32
  - 33
  - 34
  - 35
  - 36
  - 37
  - 38
  - 39
  - 40
  - 41
  - 42
  - 43
  - 44
  - 45
  - 46
  - 47
  - 48
  - 49
  - 50
  - 51
  - 52
  - 53
  - 54
  - 55
  - 56
  - 57
  - 58
  - 59
  - 60
34. Mohan V, Deepa M, Deepa R, et al. Secular trends in the prevalence of diabetes and impaired glucose tolerance in urban South India--the Chennai Urban Rural Epidemiology Study (CURES-17). *Diabetologia* 2006;**49**:1175-8.
35. Ramachandran A, Snehalatha C, Latha E, et al. Rising prevalence of NIDDM in an urban population in India. *Diabetologia* 1997;**40**:232-7.
36. International Institute for Population Sciences (IIPS) and Macro International. *National Family Health Survey (NFHS-3), 2005-06: India: Volume I*. Mumbai: IIPS, 2007.
37. International Institute for Population Sciences (IIPS) and Macro International. *National Family Health Survey (NFHS-3), 2005-06: India: Volume II*. Mumbai: IIPS, 2007.
38. Macro International Incorporated. *Sampling Manual*. Calverton, Maryland: DHS-III Basic Documentation No. 6, 1996.
39. ICF Macro. *Demographic and Health Survey Interviewer's Manual*. MEASURE DHS Basic Documentation No. 2. Calverton, Maryland, U.S.A.: ICF Macro, 2011.
40. Chitnis S. Definition of the terms scheduled castes and scheduled tribes: a crisis of ambivalence. In: Pai Panandiker VA, ed. *The Politics of Backwardness: Reservation Policy in India*. New Delhi, India: Centre for Policy Research, 1997.
41. Rutstein SO, Johnson K. *The DHS Wealth Index*. DHS Comparative Reports No. 6. Calverton, Maryland, USA: ORC Macro, 2004.
42. Filmer D, Pritchett L. Estimating wealth effects without expenditure data-or tears: an application to education enrollments in states of India *Demography* 2001;**37**:155-74.
43. World Health Organization (WHO) Expert Consultation. Appropriate body-mass index for Asian populations and its implications for policy and intervention strategies. *Lancet* 2004;**363**:157-63.
44. Subramanian SV, Jones K, Duncan C. Multilevel methods for public health research. In: Kawachi I, Berkman LF, eds. *Neighborhoods and Health*. New York, NY: Oxford University Press, 2003:65-111.
45. Goldstein H. *Multilevel statistical models*. 3rd ed. London: Arnold, 2003.
46. Rasbash J, Browne WJ, Healy M, et al. *MLwiN Version 2.20*. Bristol, UK: Centre for Multilevel Modelling, University of Bristol, 2010.
47. Browne WJ. *MCMC estimation in MLwiN*. Bristol, UK: Centre for Multilevel Modelling, University of Bristol, 2009.
48. Koh-Banerjee P, Wang Y, Hu FB, et al. Changes in body weight and body fat distribution as risk factors for clinical diabetes in US men. *Am J Epidemiol* 2004;**159**:1150-9.
49. Vazquez G, Duval S, Jacobs DR, Jr., et al. Comparison of body mass index, waist circumference, and waist/hip ratio in predicting incident diabetes: a meta-analysis. *Epidemiol Rev* 2007;**29**:115-28.
50. Guh DP, Zhang W, Bansback N, et al. The incidence of co-morbidities related to obesity and overweight: a systematic review and meta-analysis. *BMC Public Health* 2009;**9**:88.
51. Okura Y, Urban LH, Mahoney DW, et al. Agreement between self-report questionnaires and medical record data was substantial for diabetes, hypertension,

- 1  
2  
3 myocardial infarction and stroke but not for heart failure. *J Clin Epidemiol*  
4 2004;**57**:1096-103.  
5  
6 52. Subramanian SV, Subramanyam MA, Selvaraj S, et al. Are self-reports of health and  
7 morbidities in developing countries misleading? Evidence from India. *Soc Sci*  
8 *Med* 2009;**68**:260-5.  
9  
10 53. Registrar General of India. Census of India 2001: C-13 Single year age returns by  
11 residence and sex. 2001. [http://www.censusindia.gov.in/Tables\\_Published/C-](http://www.censusindia.gov.in/Tables_Published/C-Series/c_series_tables_2001.aspx)  
12 [Series/c\\_series\\_tables\\_2001.aspx](http://www.censusindia.gov.in/Tables_Published/C-Series/c_series_tables_2001.aspx).  
13  
14 54. Subramanian SV, Smith GD. Patterns, distribution, and determinants of under- and  
15 overnutrition: a population-based study of women in India. *Am J Clin Nutr*  
16 2006;**84**:633-40.  
17  
18 55. Ackerson LK, Kawachi I, Barbeau EM, et al. Geography of underweight and  
19 overweight among women in India: a multilevel analysis of 3204 neighborhoods  
20 in 26 states. *Econ Hum Biol* 2008;**6**:264-80.  
21  
22 56. Subramanian SV, Perkins JM, Khan KT. Do burdens of underweight and overweight  
23 coexist among lower socioeconomic groups in India? *Am J Clin Nutr*  
24 2009;**90**:369-76.  
25  
26 57. Colditz GA, Willett WC, Rotnitzky A, et al. Weight gain as a risk factor for clinical  
27 diabetes mellitus in women. *Ann Intern Med* 1995;**122**:481-6.  
28  
29 58. Chow CK, Raju PK, Raju R, et al. The prevalence and management of diabetes in  
30 rural India. *Diabetes Care* 2006;**29**:1717-8.  
31  
32 59. World Bank. Poverty headcount ratio at \$1.25 a day (PPP) (% of population). 2012.  
33 <http://data.worldbank.org/indicator/SI.POV.DDAY?page=1>.  
34  
35  
36  
37  
38  
39  
40  
41  
42  
43  
44  
45  
46  
47  
48  
49  
50  
51  
52  
53  
54  
55  
56  
57  
58  
59  
60

1  
2  
3  
4  
5  
6  
7  
8  
9  
10  
11  
12  
13  
14  
15  
16  
17  
18  
19  
20  
21  
22  
23  
24  
25  
26  
27  
28  
29  
30  
31  
32  
33  
34  
35  
36  
37  
38  
39  
40  
41  
42  
43  
44  
45  
46  
47  
48  
49

**Table 1** Overview of studies reporting prevalence of type-2 diabetes by markers of socioeconomic status (SES) and the association between increasing SES and diabetes in India

| Author           | Study period | Coverage | Setting  | Age   | Sample size | Diabetes assessment           | SES marker | Gender   | Diabetes prevalence: low SES (l); high SES (h) | SES-diabetes association: Odds ratio (95% confidence interval) for high SES vs low SES |
|------------------|--------------|----------|----------|-------|-------------|-------------------------------|------------|----------|------------------------------------------------|----------------------------------------------------------------------------------------|
| Singh[7]         | 1994         | Local    | Rural    | 25-64 | 1769        | blood glucose                 | Composite  | Male     | 0.9% (l); 6.1% (h)*                            | -                                                                                      |
|                  |              |          |          |       |             |                               |            | Female   | 0.9% (l); 6.9% (h)*                            | -                                                                                      |
| Singh[8]         | 1994         | Local    | Rural    | 25-64 | 1806        | blood glucose                 | Composite  | Male     | 2.5% (l); 8.6% (h)*                            | 2.03 (1.86-2.51)*                                                                      |
|                  |              |          |          |       |             |                               |            | Female   | 1.2% (l); 6.9% (h)*                            | 1.97 (1.67-2.36)*                                                                      |
| Singh[9]         | 1994         | Local    | Combined | 25-64 | 3575        | blood glucose                 | Composite  | Male     | -                                              | 4.07 (1.89-10.01)* (Urban)                                                             |
|                  |              |          |          |       |             |                               |            | -        | 3.75 (1.37-12.78)* (Rural)                     |                                                                                        |
|                  |              |          |          |       |             |                               |            | Female   | -                                              | 1.48 (0.64-4.00) (Urban)                                                               |
|                  |              |          |          |       |             |                               |            | -        | 2.55 (0.91-8.83) (Rural)                       |                                                                                        |
| Singh[10]        | 1998         | Regional | Urban    | 25-64 | 3257        | blood glucose                 | Composite  | Female   | 0.5% (l); 4.8% (h)*                            | -                                                                                      |
| Ramachandran[4]  | 2000         | Regional | Urban    | 20+   | 11216       | blood glucose                 | Income     | Combined | 12.5% (l); 21.6% (h)*                          | 1.43 (1.30-1.57)*; 1.16 (1.05-1.30)*                                                   |
| Ramachandran[11] | 1999-2000    | Local    | Urban    | 40+   | 2383        | blood glucose, drug treatment | Income     | Combined | 12.6% (l); 25.5% (h)*                          | 2.15 (1.70-2.72)                                                                       |
| Gupta[12]        | 1999-2001    | Local    | Urban    | 20+   | 1123        | self-report                   | Education  | Male     | 6.8% (l); 7.9% (h)                             | -                                                                                      |
|                  |              |          |          |       |             |                               |            | Female   | 6.6% (l); 8.3% (h)                             | -                                                                                      |



|    |                 |           |          |          |       |       |                                |              |          |                               |                   |  |
|----|-----------------|-----------|----------|----------|-------|-------|--------------------------------|--------------|----------|-------------------------------|-------------------|--|
| 1  |                 |           |          |          |       |       |                                |              |          |                               |                   |  |
| 2  |                 |           |          |          |       |       |                                |              |          |                               |                   |  |
| 3  |                 |           |          |          |       |       |                                |              |          |                               |                   |  |
| 4  |                 |           |          |          |       |       |                                |              |          |                               |                   |  |
| 5  | Reddy[13]       | 2002-2003 | Regional | Urban    | 20-69 | 19973 | blood glucose, drug treatment  | Education    | Male     | 7.6% (l); 8.4% (h)            | 1.11 (0.71-1.67)  |  |
| 6  |                 |           |          |          |       |       |                                |              | Female   | 11.2% (l); 4.2% (h)*          | 0.36 (0.23-0.56)* |  |
| 7  |                 |           |          |          |       |       |                                |              |          |                               |                   |  |
| 8  |                 |           |          |          |       |       |                                |              |          |                               |                   |  |
| 9  | Mohan[6]        | 2003-2005 | Regional | Combined | 15-64 | 44523 | self-report                    | Education    | Combined | 3.4% (l); 5.6% (h)*           | 3.02 (2.45-3.71)* |  |
| 10 |                 |           |          |          |       |       |                                |              |          |                               |                   |  |
| 11 | Ajay[14]        | 2002-2003 | Regional | Urban    | 20-69 | 10930 | blood glucose, drug treatment  | Education    | Combined | 11.6% (l); 6.9% (h)*          | 0.69 (0.54-0.89)* |  |
| 12 |                 |           |          |          |       |       |                                |              |          |                               |                   |  |
| 13 | Vijayakumar[15] | 2007      | Local    | Rural    | 18+   | 1990  | blood glucose, self-report     | Social caste | Combined | 5.9% (l); 17.4% (h)           | -                 |  |
| 14 |                 |           |          |          |       |       |                                | Wealth       | Combined |                               | 1.43 (1.04-1.95)* |  |
| 15 |                 |           |          |          |       |       |                                |              |          |                               |                   |  |
| 16 | Gupta[16]       | 1999-2003 | Local    | Urban    | 20-59 | 1289  | blood glucose, self-report     | Education    | Male     | 8.0% (l); 18.8% (h)*          | -                 |  |
| 17 |                 |           |          |          |       |       |                                |              | Female   | 6.0% (l); 34.7% (h)*          | -                 |  |
| 18 |                 |           |          |          |       |       |                                |              | Combined | 6.9% (l); 26.4% (h)*          | -                 |  |
| 19 |                 |           |          |          |       |       |                                |              |          |                               |                   |  |
| 20 |                 |           |          |          |       |       |                                |              |          |                               |                   |  |
| 21 |                 |           |          |          |       |       |                                |              |          |                               |                   |  |
| 22 |                 |           |          |          |       |       |                                |              |          |                               |                   |  |
| 23 |                 |           |          |          |       |       |                                |              |          |                               |                   |  |
| 24 | Kinra[17]       | 2005-2007 | Regional | Rural    | 20-69 | 1983  | blood glucose, self-report     | Wealth       | Male     | 1.8% (l); 8.0% (h)*           | -                 |  |
| 25 |                 |           |          |          |       |       |                                |              | Female   | 3.9% (l); 5.1% (h)            | -                 |  |
| 26 |                 |           |          |          |       |       |                                |              |          |                               |                   |  |
| 27 |                 |           |          |          |       |       |                                |              |          |                               |                   |  |
| 28 | Samuel[18]      | 1969-2002 | Regional | Urban    | 26-32 | 2218  | blood glucose†, drug treatment | Wealth       | Male     | 26.2% (l); 31.9% (h)* (Urban) | -                 |  |
| 29 |                 |           |          |          |       |       |                                |              |          | 10.9% (l); 31.8% (h) (Rural)  | -                 |  |
| 30 |                 |           |          |          |       |       |                                |              |          | 12.1% (l); 30.3% (h)* (Urban) | -                 |  |
| 31 |                 |           |          |          |       |       |                                |              |          | 16.1% (l); 32.1% (h)* (Rural) | -                 |  |
| 32 |                 |           |          |          |       |       |                                |              |          |                               |                   |  |
| 33 |                 |           |          | Rural    |       |       |                                |              | Female   |                               |                   |  |
| 34 |                 |           |          |          |       |       |                                |              | Combined | -                             | 2.8 (1.9-4.1)*    |  |
| 35 |                 |           |          |          |       |       |                                |              |          |                               |                   |  |
| 36 |                 |           |          | Combined |       |       |                                |              | Male     | 15.0% (l); 34.7% (h) (Urban)  | -                 |  |
| 37 |                 |           |          |          |       |       |                                |              |          |                               |                   |  |
| 38 |                 |           |          | Urban    |       |       |                                | Education    |          |                               |                   |  |
| 39 |                 |           |          |          |       |       |                                |              |          |                               |                   |  |
| 40 |                 |           |          |          |       |       |                                |              |          |                               |                   |  |
| 41 |                 |           |          |          |       |       |                                |              |          |                               |                   |  |
| 42 |                 |           |          |          |       |       |                                |              |          |                               |                   |  |
| 43 |                 |           |          |          |       |       |                                |              |          |                               |                   |  |
| 44 |                 |           |          |          |       |       |                                |              |          |                               |                   |  |
| 45 |                 |           |          |          |       |       |                                |              |          |                               |                   |  |
| 46 |                 |           |          |          |       |       |                                |              |          |                               |                   |  |
| 47 |                 |           |          |          |       |       |                                |              |          |                               |                   |  |
| 48 |                 |           |          |          |       |       |                                |              |          |                               |                   |  |
| 49 |                 |           |          |          |       |       |                                |              |          |                               |                   |  |

1  
2  
3  
4  
5  
6  
7  
8  
9  
10  
11  
12  
13  
14  
15  
16  
17  
18  
19  
20  
21  
22  
23  
24  
25  
26  
27  
28  
29  
30  
31  
32  
33  
34  
35  
36  
37  
38  
39  
40  
41  
42  
43  
44  
45  
46  
47  
48  
49

|           |      |          |          |     |      |                            |  |           |                       |                       |   |
|-----------|------|----------|----------|-----|------|----------------------------|--|-----------|-----------------------|-----------------------|---|
|           |      |          |          |     |      |                            |  |           | 25.7% (l); 19.7% (h)  | -                     |   |
|           |      |          | Rural    |     |      |                            |  | Female    | 31.5% (l); 32.2% (h)* | -                     |   |
|           |      |          |          |     |      |                            |  |           | (Urban)               | -                     |   |
|           |      |          |          |     |      |                            |  |           | 19.1% (l); 50.0% (h)  | -                     |   |
|           |      |          | Combined |     |      |                            |  | Combined  | -                     | 1.0 (0.6-1.6)         |   |
| Zaman[19] | 2005 | Regional | Rural    | 30+ | 4535 | blood glucose, self-report |  | Income    | Male                  | 16.2% (l); 21.2% (h)* | - |
|           |      |          |          |     |      |                            |  |           | Female                | 12.1% (l); 15.0% (h)* | - |
|           |      |          |          |     |      |                            |  | Education | Male                  | 12.4% (l); 20.1% (h)* | - |
|           |      |          |          |     |      |                            |  |           | Female                | 12.8% (l); 13.1% (h)  | - |

Notes: Socioeconomic status (SES) markers defined as education, household wealth, social caste, or a composite of 2 or more measures; \*P<0.05; - indicates not reported; †includes impaired glucose tolerance and impaired fasting glucose

**Table 2** Characteristics of survey participants and frequency distribution of self-reported diabetes in India, males and females from the 3<sup>rd</sup> National Family Health Survey

|                       | Self-reported diabetes |     | Total    |
|-----------------------|------------------------|-----|----------|
|                       | <i>n</i>               | %   | <i>n</i> |
| Participants          | 2439                   | 1.5 | 168135   |
| Residence             |                        |     |          |
| Rural                 | 818                    | 1.0 | 86013    |
| Urban                 | 1621                   | 2.0 | 82122    |
| Age group             |                        |     |          |
| 18-29 y               | 266                    | 0.3 | 76174    |
| 30-39 y               | 602                    | 1.2 | 51132    |
| 40-49 y               | 1238                   | 3.4 | 36402    |
| 50-54 y               | 333                    | 7.5 | 4427     |
| Gender                |                        |     |          |
| Male                  | 1144                   | 1.8 | 65255    |
| Female                | 1295                   | 1.3 | 102880   |
| Marital status        |                        |     |          |
| Single                | 132                    | 0.3 | 38078    |
| Married               | 2165                   | 1.8 | 123457   |
| Widowed               | 108                    | 2.5 | 4320     |
| Divorced or separated | 34                     | 1.5 | 2280     |
| Religion              |                        |     |          |
| Hindu                 | 1775                   | 1.4 | 123411   |
| Muslim                | 340                    | 1.6 | 21510    |
| Christian             | 213                    | 1.4 | 14779    |
| Sikh                  | 49                     | 1.5 | 3236     |
| Buddhist              | 34                     | 1.4 | 2451     |
| Other                 | 28                     | 1.0 | 2748     |
| Social Caste          |                        |     |          |
| Other caste           | 1026                   | 1.8 | 56063    |
| Scheduled caste       | 349                    | 1.3 | 27677    |
| Scheduled tribe       | 167                    | 0.8 | 21372    |
| Other backward class  | 781                    | 1.4 | 55641    |
| No caste              | 116                    | 1.6 | 7382     |
| Education             |                        |     |          |
| No education          | 464                    | 1.0 | 44856    |
| Primary               | 358                    | 1.4 | 24969    |

|    |                                      |      |     |       |
|----|--------------------------------------|------|-----|-------|
| 1  |                                      |      |     |       |
| 2  |                                      |      |     |       |
| 3  | Secondary                            | 1166 | 1.6 | 74715 |
| 4  | Higher                               | 451  | 1.9 | 23595 |
| 5  |                                      |      |     |       |
| 6  |                                      |      |     |       |
| 7  | Household wealth                     |      |     |       |
| 8  | Poorest                              | 77   | 0.4 | 17252 |
| 9  | 2 <sup>nd</sup> quintile             | 175  | 0.8 | 22948 |
| 10 | 3 <sup>rd</sup> quintile             | 278  | 0.9 | 32070 |
| 11 | 4 <sup>th</sup> quintile             | 573  | 1.4 | 42091 |
| 12 | Richest                              | 1336 | 2.5 | 53774 |
| 13 |                                      |      |     |       |
| 14 |                                      |      |     |       |
| 15 | Body mass index (kg/m <sup>2</sup> ) |      |     |       |
| 16 | <18.5                                | 243  | 0.6 | 42128 |
| 17 | 18.5-22.9                            | 703  | 0.9 | 74089 |
| 18 | 23-27.4                              | 833  | 2.7 | 31217 |
| 19 | 27.5+                                | 547  | 4.8 | 11502 |
| 20 |                                      |      |     |       |
| 21 |                                      |      |     |       |
| 22 |                                      |      |     |       |
| 23 |                                      |      |     |       |
| 24 |                                      |      |     |       |
| 25 |                                      |      |     |       |
| 26 |                                      |      |     |       |
| 27 |                                      |      |     |       |
| 28 |                                      |      |     |       |
| 29 |                                      |      |     |       |
| 30 |                                      |      |     |       |
| 31 |                                      |      |     |       |
| 32 |                                      |      |     |       |
| 33 |                                      |      |     |       |
| 34 |                                      |      |     |       |
| 35 |                                      |      |     |       |
| 36 |                                      |      |     |       |
| 37 |                                      |      |     |       |
| 38 |                                      |      |     |       |
| 39 |                                      |      |     |       |
| 40 |                                      |      |     |       |
| 41 |                                      |      |     |       |
| 42 |                                      |      |     |       |
| 43 |                                      |      |     |       |
| 44 |                                      |      |     |       |
| 45 |                                      |      |     |       |
| 46 |                                      |      |     |       |
| 47 |                                      |      |     |       |
| 48 |                                      |      |     |       |
| 49 |                                      |      |     |       |
| 50 |                                      |      |     |       |
| 51 |                                      |      |     |       |
| 52 |                                      |      |     |       |
| 53 |                                      |      |     |       |
| 54 |                                      |      |     |       |
| 55 |                                      |      |     |       |
| 56 |                                      |      |     |       |
| 57 |                                      |      |     |       |
| 58 |                                      |      |     |       |
| 59 |                                      |      |     |       |
| 60 |                                      |      |     |       |

**Table 3** Associations between socioeconomic status and self-reported diabetes in India; 3<sup>rd</sup> National family health survey, 2005-6

| Variable                                  | Models 1-3 |               | Model 4    |               | Model 5    |               |
|-------------------------------------------|------------|---------------|------------|---------------|------------|---------------|
|                                           | Odds ratio | 95% CI        | Odds ratio | 95% CI        | Odds ratio | 95% CI        |
| <b>Social Caste</b>                       |            |               |            |               |            |               |
| Other caste                               | 1.00       |               | 1.00       |               | 1.00       |               |
| Scheduled caste                           | 0.81       | (0.71 - 0.94) | 1.05       | (0.91 - 1.21) | 1.07       | (0.93 - 1.24) |
| Scheduled tribe                           | 0.57       | (0.46 - 0.70) | 0.72       | (0.58 - 0.90) | 0.73       | (0.57 - 0.92) |
| Other backward caste                      | 0.84       | (0.75 - 0.94) | 0.95       | (0.85 - 1.07) | 0.96       | (0.86 - 1.08) |
| No caste                                  | 0.89       | (0.71 - 1.11) | 0.94       | (0.75 - 1.17) | 0.95       | (0.76 - 1.20) |
| <b>Wealth</b>                             |            |               |            |               |            |               |
| Poorest                                   | 1.00       |               | 1.00       |               | 1.00       |               |
| 2nd quintile                              | 1.59       | (1.20 - 2.12) | 1.57       | (1.21 - 2.07) | 1.49       | (1.14 - 1.96) |
| 3rd quintile                              | 1.63       | (1.23 - 2.16) | 1.55       | (1.21 - 2.02) | 1.39       | (1.07 - 1.81) |
| 4th quintile                              | 2.42       | (1.85 - 3.17) | 2.25       | (1.76 - 2.92) | 1.79       | (1.40 - 2.34) |
| Richest                                   | 4.04       | (3.08 - 5.30) | 3.65       | (2.83 - 4.78) | 2.58       | (1.99 - 3.40) |
| <b>Education</b>                          |            |               |            |               |            |               |
| No education                              | 1.00       |               | 1.00       |               | 1.00       |               |
| Primary                                   | 1.23       | (1.06 - 1.43) | 1.06       | (0.91 - 1.22) | 1.00       | (0.86 - 1.17) |
| Secondary                                 | 1.68       | (1.49 - 1.90) | 1.18       | (1.04 - 1.35) | 1.12       | (0.98 - 1.28) |
| Higher                                    | 1.87       | (1.61 - 2.18) | 1.12       | (0.95 - 1.32) | 1.01       | (0.86 - 1.20) |
| <b>Body mass index (kg/m<sup>2</sup>)</b> |            |               |            |               |            |               |
| <18.5                                     |            |               |            |               | 1.00       |               |
| 18.5-22.9                                 |            |               |            |               | 1.25       | (1.08 - 1.46) |
| 23-27.4                                   |            |               |            |               | 2.08       | (1.79 - 2.44) |
| 27.5+                                     |            |               |            |               | 2.98       | (2.51 - 3.54) |

**Notes:** In models 1-3 one SES marker (social caste, household wealth, education) was modelled at a time while adjusting for age, gender, religion, and place of residence. In model 4, all SES markers were included along with covariates from models 1-3. In model 5, BMI was included with markers of SES and covariates from model 4.

**Table 4** Variance in self-reported diabetes status between local areas and states in India; expressed as percentage of the contribution to the total variance in diabetes

|             | Age & gender adjusted* |       |      | Fully adjusted** |       |     |
|-------------|------------------------|-------|------|------------------|-------|-----|
|             | Variance               | SE    | %    | Variance         | SE    | %   |
| States      | 0.231                  | 0.076 | 5.9  | 0.204            | 0.068 | 5.4 |
| Local areas | 0.425                  | 0.043 | 10.8 | 0.240            | 0.041 | 6.4 |

**Notes:**

\*Multilevel model adjusted for age and gender only

\*\*Multilevel model fully adjusted for age, gender, marital status, religion, social caste, household wealth, education, body mass index, and place of residence

**FIGURE LEGENDS**

**Figure 1** Flow diagram showing exclusions and final sample sizes, 2005-6 National Family Health Survey (NFHS)

Notes for figure 1: \*2,333 individuals reported unknown diabetes status; in 40 individuals diabetes status was not reported/missing. Of the 2,333 individuals who reported unknown diabetes status, 2,210 (94.7%) had complete data for BMI and were included in sensitivity analyses.

\*\*Analyses involving body mass index (BMI) as an independent variable were restricted to 158,936 individuals

**Figure 2** State level prevalence of self-reported diabetes in India for men aged 18-54 (left) and women aged 18-49 (right). Darker colours indicate higher prevalence.

Notes for figure 2: State name abbreviations: AP Andhra Pradesh; AR Arunachal Pradesh; AS Assam; BR Bihar; CT Chhattisgarh; DL Delhi; GA Goa; GJ Gujarat; HR Haryana; HP Himachal Pradesh; JK Jammu & Kashmir; JH Jharkhand; KA Karnataka; KL Kerala; MP Madhya Pradesh; MH Maharashtra; MN Manipur; ML Meghalaya; MZ Mizoram; NL Nagaland; OR Orissa; PB Punjab; RJ Rajasthan; SK Sikkim; TN Tamil Nadu; TR Tripura; UP Uttar Pradesh; UK Uttarakhand (Uttaranchal); WB West Bengal

**Figure 3** Odds ratios for self-reported diabetes by state of residence in India

Notes for figure 3: horizontal lines are 95% credible intervals; adjusted for age, gender, marital status, religion, social caste, household wealth, education, body mass index and place of residence.

1  
2  
3 **Figure 4** Odds ratio (OR) for self-reported diabetes for a one-quintile increase in  
4 household wealth for men (aged 18-54) and women (aged 18-49) in India and 29 states  
5  
6

7 Notes for figure 4: Adjusted for age, gender, marital status, religion, social caste,  
8 education, body mass index and place of residence.  
9

10 **Figure 5** Mean body mass index across three possible responses for self-reported  
11 diabetes.  
12

13  
14 Notes for figure 5: Vertical lines represent 95% confidence intervals. Body mass index  
15 (in kg/m<sup>2</sup>) calculated from measured height and weight values. Horizontal line represents  
16 overall mean body mass index (21.2 kg/m<sup>2</sup>, SD 3.9).  
17  
18  
19  
20  
21  
22  
23  
24  
25  
26  
27  
28  
29  
30  
31  
32  
33  
34  
35  
36  
37  
38  
39  
40  
41  
42  
43  
44  
45  
46  
47  
48  
49  
50  
51  
52  
53  
54  
55  
56  
57  
58  
59  
60

SUPPLEMENTAL MATERIAL

Supplemental Table 1 Associations between socioeconomic status and self-reported diabetes in India from models restricted to male and female samples; 3rd National family health survey 2005-6

| Variable             | Men aged 18-54 |       |        |         |       |        | Women aged 18-49 |       |        |            |       |        |         |       |        |         |       |        |
|----------------------|----------------|-------|--------|---------|-------|--------|------------------|-------|--------|------------|-------|--------|---------|-------|--------|---------|-------|--------|
|                      | Models 1-3     |       |        | Model 4 |       |        | Model 5          |       |        | Models 1-3 |       |        | Model 4 |       |        | Model 5 |       |        |
|                      | O              | R     | 95% CI | O       | R     | 95% CI | O                | R     | 95% CI | O          | R     | 95% CI | O       | R     | 95% CI | O       | R     | 95% CI |
| Social Caste         | 1.0            |       |        | 1.0     |       |        | 1.0              |       |        | 1.0        |       |        | 1.0     |       |        | 1.0     |       |        |
| Other caste          | 0              |       |        | 0       |       |        | 0                |       |        | 0          |       |        | 0       |       |        | 0       |       |        |
| Scheduled caste      | 0.8            | (0.68 | 1.0    | 1.1     | (0.92 | 1.3    | 1.2              | (0.96 | 1.4    | 0.7        | (0.64 | 0.9    | 0.9     | (0.78 | 1.1    | 0.9     | (0.79 | 1.1    |
| Scheduled tribe      | 4              | -     | 3)     | 4       | -     | 9)     | 0                | -     | 8)     | 7          | -     | 3)     | 5       | -     | 4)     | 7       | -     | 6)     |
| Other backward caste | 0.5            | (0.40 | 0.7    | 0.7     | (0.52 | 1.0    | 0.7              | (0.56 | 1.0    | 0.5        | (0.39 | 0.7    | 0.6     | (0.48 | 0.8    | 0.6     | (0.48 | 0.8    |
| No caste             | 5              | -     | 5)     | 3       | -     | 0)     | 8                | -     | 7)     | 4          | -     | 1)     | 5       | -     | 7)     | 4       | -     | 7)     |
| Other backward caste | 0.8            | (0.74 | 1.0    | 1.0     | (0.86 | 1.1    | 1.0              | (0.88 | 1.2    | 0.7        | (0.67 | 0.9    | 0.8     | (0.74 | 1.0    | 0.8     | (0.75 | 1.0    |
| No caste             | 6              | -     | 0)     | 1       | -     | 9)     | 4                | -     | 3)     | 8          | -     | 1)     | 6       | -     | 1)     | 7       | -     | 2)     |
| No caste             | 0.9            | (0.62 | 1.3    | 0.9     | (0.65 | 1.4    | 1.0              | (0.71 | 1.5    | 0.8        | (0.66 | 1.1    | 0.9     | (0.68 | 1.2    | 0.9     | (0.67 | 1.2    |
| No caste             | 2              | -     | 7)     | 6       | -     | 0)     | 4                | -     | 2)     | 7          | -     | 6)     | 0       | -     | 1)     | 1       | -     | 2)     |
| Wealth               | 1.0            |       |        | 1.0     |       |        | 1.0              |       |        | 1.0        |       |        | 1.0     |       |        | 1.0     |       |        |
| Poorest              | 0              |       |        | 0       |       |        | 0                |       |        | 0          |       |        | 0       |       |        | 0       |       |        |
| 2nd quintile         | 1.4            | (0.97 | 2.1    | 1.3     | (0.94 | 1.9    | 1.3              | (0.89 | 1.8    | 1.7        | (1.17 | 2.4    | 1.6     | (1.15 | 2.4    | 1.6     | (1.18 | 2.5    |
| 3rd quintile         | 0              | -     | 1)     | 5       | -     | 7)     | 2                | -     | 8)     | 2          | -     | 6)     | 6       | -     | 4)     | 9       | -     | 2)     |
| 4th quintile         | 1.4            | (1.03 | 2.1    | 1.3     | (0.95 | 1.9    | 1.2              | (0.88 | 1.8    | 1.7        | (1.17 | 2.5    | 1.6     | (1.10 | 2.2    | 1.4     | (1.07 | 2.2    |
| Richest              | 6              | -     | 5)     | 6       | -     | 6)     | 9                | -     | 0)     | 3          | -     | 2)     | 0       | -     | 6)     | 8       | -     | 5)     |
| Richest              | 2.1            | (1.51 | 3.1    | 1.8     | (1.34 | 2.6    | 1.6              | (1.14 | 2.2    | 2.6        | (1.79 | 3.8    | 2.3     | (1.64 | 3.3    | 1.8     | (1.38 | 2.8    |
| No education         | 0              | -     | 0)     | 7       | -     | 2)     | 5                | -     | 8)     | 6          | -     | 7)     | 4       | -     | 2)     | 9       | -     | 3)     |
| Primary              | 4.5            | (3.22 | 6.8    | 3.8     | (2.73 | 5.3    | 3.0              | (2.05 | 4.2    | 3.6        | (2.42 | 5.4    | 3.1     | (2.19 | 4.4    | 2.2     | (1.62 | 3.3    |
| Primary              | 5              | -     | 1)     | 2       | -     | 7)     | 4                | -     | 7)     | 7          | -     | 1)     | 6       | -     | 7)     | 4       | -     | 2)     |
| Education            | 1.0            |       |        | 1.0     |       |        | 1.0              |       |        | 1.0        |       |        | 1.0     |       |        | 1.0     |       |        |
| No education         | 0              |       |        | 0       |       |        | 0                |       |        | 0          |       |        | 0       |       |        | 0       |       |        |
| Primary              | 1.1            | (0.86 | 1.3    | 0.9     | (0.75 | 1.2    | 0.9              | (0.70 | 1.2    | 1.3        | (1.16 | 1.6    | 1.1     | (0.98 | 1.4    | 1.1     | (0.92 | 1.3    |



|                                      |     |       |     |     |       |     |     |       |     |     |       |     |     |       |     |     |       |     |
|--------------------------------------|-----|-------|-----|-----|-------|-----|-----|-------|-----|-----|-------|-----|-----|-------|-----|-----|-------|-----|
|                                      | 0   | -     | 8)  | 6   | -     | 1)  | 2   | -     | 0)  | 9   | -     | 7)  | 7   | -     | 0)  | 1   | -     | 3)  |
|                                      | 1.6 | (1.37 | 2.0 | 1.1 | (0.90 | 1.4 | 1.0 | (0.85 | 1.3 | 1.7 | (1.52 | 2.0 | 1.2 | (1.08 | 1.5 | 1.2 | (1.02 | 1.4 |
| Secondary                            | 6   | -     | 1)  | 3   | -     | 4)  | 7   | -     | 6)  | 6   | -     | 2)  | 8   | -     | 0)  | 1   | -     | 3)  |
|                                      | 2.3 | (1.87 | 2.9 | 1.2 | (0.98 | 1.7 | 1.1 | (0.86 | 1.4 | 1.4 | (1.12 | 1.7 | 0.9 | (0.72 | 1.1 | 0.8 | (0.66 | 1.0 |
| Higher                               | 6   | -     | 2)  | 7   | -     | 0)  | 3   | -     | 8)  | 0   | -     | 3)  | 1   | -     | 5)  | 5   | -     | 8)  |
| Body mass index (kg/m <sup>2</sup> ) |     |       |     |     |       |     |     |       |     |     |       |     |     |       |     |     |       |     |
| <18                                  |     |       |     |     |       |     | 1.0 |       |     |     |       |     |     |       |     | 1.0 |       |     |
|                                      |     |       |     |     |       |     | 0   |       |     |     |       |     |     |       |     | 0   |       |     |
| 18.5-22.9                            |     |       |     |     |       |     | 1.2 | (0.99 | 1.5 |     |       |     |     |       |     | 1.2 | (1.01 | 1.5 |
|                                      |     |       |     |     |       |     | 5   | -     | 5)  |     |       |     |     |       |     | 4   | -     | 3)  |
| 23-27.4                              |     |       |     |     |       |     | 2.0 | (1.59 | 2.5 |     |       |     |     |       |     | 2.1 | (1.75 | 2.6 |
|                                      |     |       |     |     |       |     | 0   | -     | 0)  |     |       |     |     |       |     | 2   | -     | 8)  |
| 27.5+                                |     |       |     |     |       |     | 2.1 | (1.65 | 2.8 |     |       |     |     |       |     | 3.5 | (2.89 | 4.5 |
|                                      |     |       |     |     |       |     | 5   | -     | 6)  |     |       |     |     |       |     | 8   | -     | 6)  |

Notes: OR odds ratio; In models 1-3 one SES marker (social caste, household wealth, education) was modelled at a time while adjusting for age, gender, religion, and place of residence. In model 4, all SES markers were included along with covariates from models 1-3. In model 5, BMI was included with markers of SES and covariates from model 4.

**Supplemental Table 2** Odds ratio (OR) for self-reported diabetes for a one-quintile increase in household wealth for men (aged 18-54) and women (aged 18-49) in India and 29 states

| State             | <i>n</i> | Self-reported diabetes |               |
|-------------------|----------|------------------------|---------------|
|                   |          | Wealth OR              | 95% CI*       |
| India             | 158,936  | 1.31                   | (1.20 - 1.42) |
| Jammu and Kashmir | 3,383    | 1.55                   | (1.21 - 1.98) |
| Maharashtra       | 14,053   | 1.51                   | (1.27 - 1.78) |
| Orissa            | 4,838    | 1.50                   | (1.24 - 1.81) |
| Arunachal Pradesh | 1,798    | 1.49                   | (1.14 - 1.94) |
| Uttar Pradesh     | 17,555   | 1.47                   | (1.28 - 1.70) |
| Sikkim            | 2,406    | 1.46                   | (1.11 - 1.92) |
| Madhya Pradesh    | 7,756    | 1.43                   | (1.19 - 1.71) |
| Assam             | 3,904    | 1.43                   | (1.15 - 1.77) |
| Uttaranchal       | 3,120    | 1.42                   | (1.12 - 1.81) |
| Punjab            | 4,134    | 1.41                   | (1.10 - 1.81) |
| Mizoram           | 2,089    | 1.40                   | (1.07 - 1.85) |
| Karnataka         | 9,049    | 1.40                   | (1.19 - 1.64) |
| Chhattisgarh      | 4,246    | 1.36                   | (1.14 - 1.64) |
| Delhi             | 3,026    | 1.35                   | (1.05 - 1.73) |
| Rajasthan         | 4,433    | 1.33                   | (1.03 - 1.71) |
| Meghalaya         | 2,135    | 1.29                   | (1.03 - 1.63) |
| Jharkhand         | 3,044    | 1.29                   | (1.06 - 1.57) |
| Tamil Nadu        | 10,106   | 1.28                   | (1.11 - 1.48) |
| Andhra Pradesh    | 11,824   | 1.25                   | (1.09 - 1.45) |
| Himachal Pradesh  | 3,563    | 1.25                   | (0.97 - 1.61) |
| Gujarat           | 4,322    | 1.25                   | (1.00 - 1.56) |
| Goa               | 3,883    | 1.20                   | (0.98 - 1.48) |
| Nagaland          | 6,350    | 1.19                   | (0.99 - 1.44) |
| Tripura           | 2,089    | 1.18                   | (0.96 - 1.45) |
| Manipur           | 6,941    | 1.14                   | (0.95 - 1.37) |
| Haryana           | 3,173    | 1.11                   | (0.90 - 1.38) |
| Bihar             | 3,882    | 1.10                   | (0.93 - 1.30) |
| Kerala            | 4,018    | 1.10                   | (0.89 - 1.35) |
| West Bengal       | 7,816    | 0.95                   | (0.83 - 1.09) |

Notes: Odds ratios (OR) and 95% credible intervals (CI) adjusted for age, gender, marital status, religion, social caste, education, body mass index and place of residence.

**Supplemental Table 3** Associations between socioeconomic status and body mass index for self-reported diabetics and those with unknown diabetes status compared to self-reported non-diabetics using a multilevel multinomial regression model.

| Variable               | Self-reported diabetes |               | Unknown diabetes status |               |
|------------------------|------------------------|---------------|-------------------------|---------------|
|                        | Odds ratio             | 95% CI*       | Odds ratio              | 95% CI        |
| <b>Social Caste</b>    |                        |               |                         |               |
| Other caste            | 1.00                   |               | 1.00                    |               |
| Scheduled caste        | 1.07                   | (0.93 - 1.24) | 1.13                    | (0.96 - 1.31) |
| Scheduled tribe        | 0.73                   | (0.58 - 0.91) | 1.52                    | (1.25 - 1.84) |
| Other backward caste   | 0.96                   | (0.86 - 1.08) | 1.07                    | (0.93 - 1.23) |
| No caste               | 0.95                   | (0.75 - 1.18) | 0.76                    | (0.58 - 0.99) |
| <b>Wealth</b>          |                        |               |                         |               |
| Poorest                | 1.00                   |               | 1.00                    |               |
| 2nd quintile           | 1.51                   | (1.14 - 2.03) | 0.90                    | (0.77 - 1.05) |
| 3rd quintile           | 1.41                   | (1.07 - 1.89) | 0.86                    | (0.73 - 1.01) |
| 4th quintile           | 1.82                   | (1.38 - 2.44) | 0.82                    | (0.68 - 0.98) |
| Richest                | 2.63                   | (1.97 - 3.56) | 0.64                    | (0.51 - 0.79) |
| <b>Education</b>       |                        |               |                         |               |
| No education           | 1.00                   |               | 1.00                    |               |
| Primary                | 1.00                   | (0.87 - 1.17) | 0.86                    | (0.76 - 0.99) |
| Secondary              | 1.12                   | (0.98 - 1.28) | 0.71                    | (0.63 - 0.81) |
| Higher                 | 1.01                   | (0.85 - 1.21) | 0.45                    | (0.36 - 0.57) |
| <b>Body mass index</b> |                        |               |                         |               |
| <18.5                  | 1.00                   |               | 1.00                    |               |
| 18.5-22.9              | 1.26                   | (1.08 - 1.46) | 1.03                    | (0.93 - 1.15) |
| 23-27.4                | 2.09                   | (1.79 - 2.45) | 1.17                    | (1.01 - 1.36) |
| 27.5+                  | 2.99                   | (2.52 - 3.55) | 1.33                    | (1.06 - 1.66) |

Notes: model adjusted for age, gender, religion, marital status, place of residence  
\*95% credible interval

1  
2  
3  
4  
5  
6  
7  
8 **Title** Association between socioeconomic status and self-reported diabetes in India: a  
9 cross-sectional multilevel analysis  
10

11 **Authors and affiliation**

12 Daniel J Corsi, MSc, Population Health Research Institute, McMaster University,  
13  
14 Hamilton, ON, Canada  
15

16 SV Subramanian, PhD, Professor of Population Health and Geography,  
17  
18 Department of Society, Human Development, and Health, Harvard School of Public  
19  
20 Health, Boston, MA, USA  
21  
22

23 **Corresponding author details**

24  
25 Professor S V Subramanian, Harvard School of Public Health, 677 Huntington Avenue,  
26  
27 Boston MA 02115, USA; Tel: 617-432-6299; Fax: 617-432-3123; Email:

28  
29 [svsubram@hsph.harvard.edu](mailto:svsubram@hsph.harvard.edu)  
30

31 **Running head** Socioeconomic status and diabetes in India  
32

33 **Word count:** 3,340  
34

35 **Funding Statement** This research received no specific grant from any funding agency in  
36  
37 the public, commercial or not-for-profit sectors  
38

39 **Conflict of Interest:** Authors declare no conflict of interest.  
40  
41  
42  
43  
44  
45  
46  
47  
48  
49  
50  
51  
52  
53  
54  
55  
56  
57  
58  
59  
60

## ABSTRACT

**Objectives** To quantify the association between socioeconomic status (SES) and type-2 diabetes in India

**Design** Nationally representative cross-sectional household survey

**Setting** Urban and rural areas across 29 states in India

**Participants** 168,135 survey respondents aged 18-49 y (women) and 18-54 y (men)

**Primary outcome measure** Self-reported diabetes status

**Results** Markers of SES were social caste, ~~education, and~~ household wealth, ~~and~~ education. The overall prevalence of self-reported diabetes was 1.5%; this increased to 1.9% and 2.5% for those with the highest levels of education and household wealth, respectively. In ~~adjusted~~ multilevel logistic ~~regression models-~~ (adjusted for age, gender, religion, marital status, and place of residence) ~~regression models~~, education (odds ratio 1.87 for higher education vs no education) and household wealth (odds ratio 4.04 for richest quintile vs poorest) were positively related to self-reported diabetes ( $P < 0.0001$ ). In a fully adjusted model including all socioeconomic variables and body mass index (BMI), household wealth emerged as positive and statistically significant with an the odds ratio for self-reported diabetes ~~was of~~ 2.58 (95% credible interval [CI]: 1.99-3.40) for the richest quintile of household wealth versus the poorest. Nationally in India a one-quintile increase in household wealth was associated with an odds ratio of 1.31 (95% CI: 1.20-1.42) for self-reported diabetes. This association was consistent across states with the relationship found to be positive in 97% (28 of 29 states) and statistically significant in 69% (20 of 29).

1  
2  
3  
4  
5  
6  
7  
8 **Conclusions** We found that the highest socioeconomic status groups in India appear to be  
9  
10 at greatest risk for type-2 diabetes. This raises important policy implications for  
11  
12 addressing the disease burdens among the poor versus those among the non poor in the  
13  
14 context of India, where ~~nearly greater than half of the 40 percent of the~~ population is  
15  
16 living in poverty.  
17  
18  
19  
20  
21  
22  
23  
24  
25  
26  
27  
28  
29  
30  
31  
32  
33  
34  
35  
36  
37  
38  
39  
40  
41  
42  
43  
44  
45  
46  
47  
48  
49  
50  
51  
52  
53  
54  
55  
56  
57  
58  
59  
60

## ARTICLE SUMMARY

### Article Focus

- The relationship between socioeconomic factors and type-2 diabetes has not been previously studied for the whole of India [and across states](#)
- Our objective was to investigate associations between measures of socioeconomic status (defined as social caste, education, household wealth) and self-reported diabetes status in India
- In addition we explored geographic variation in [diabetes-the prevalence of diabetes](#) between states and local areas in India [and between-state variability in the SES-diabetes relationship](#)

### Key messages

- The highest socioeconomic groups appear to be at greatest risk for diabetes in India; [with the strength of the association consistent in size and magnitude across states](#)
- ~~In addition, t~~There is substantial geographic heterogeneity in the prevalence of diabetes
- These findings raise important policy implications for in addressing the disease burdens among the poor versus those among the non poor in the context of India, where nearly half of the population is living in poverty.

### Strengths and Limitations

- The key strength of this study is the use of a large, nationally-representative survey to assess the socioeconomic and geographic patterning of diabetes across

1  
2  
3  
4  
5  
6  
7  
8  
9  
10  
11  
12  
13  
14  
15  
16  
17  
18  
19  
20  
21  
22  
23  
24  
25  
26  
27  
28  
29  
30  
31  
32  
33  
34  
35  
36  
37  
38  
39  
40  
41  
42  
43  
44  
45  
46  
47  
48  
49  
50  
51  
52  
53  
54  
55  
56  
57  
58  
59  
60

all of India. Limitations include the relatively younger age of the sample and assessment of diabetes status on the basis of self-reports.

For peer review only

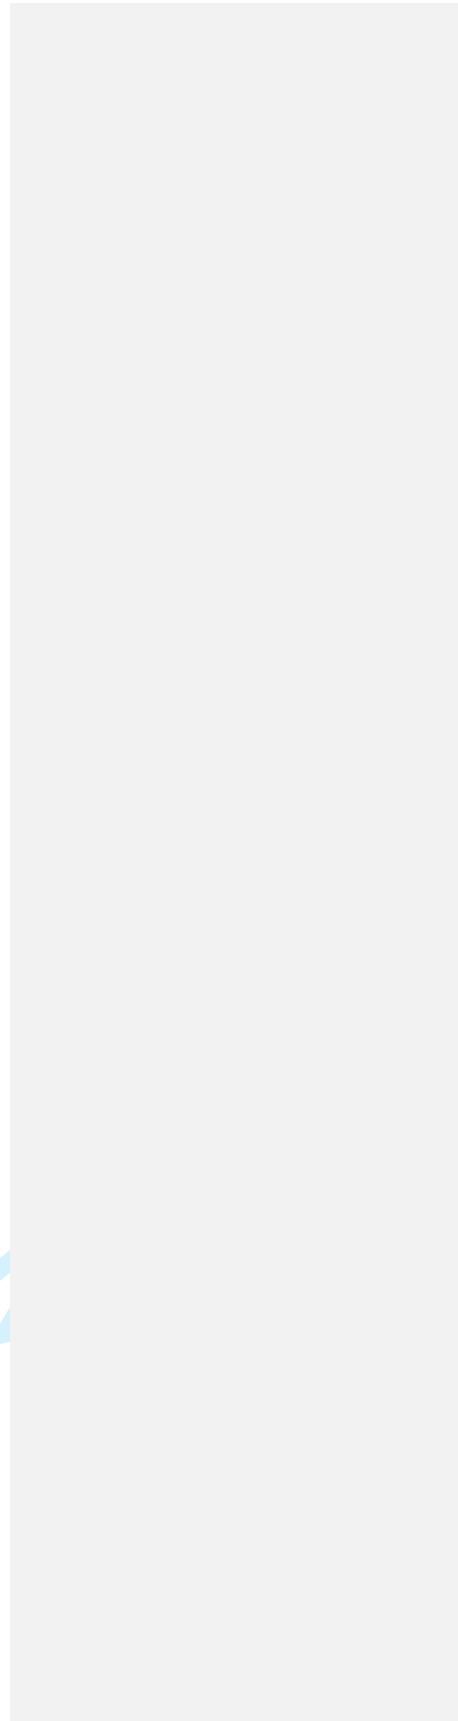



## INTRODUCTION

The prevalence of type-2 diabetes in India has been investigated in numerous population based surveys conducted across a range of settings since the 1970s.[1-6] Despite multiple prevalence studies, few no nationally representative studies exist which have considered the association between socioeconomic status (SES) and type-2 diabetes in India. In a review of 15 existing studies which have reported the prevalence of type-2 diabetes by SES and/or associations between SES and type-2 diabetes, all were found to have been based on local or regional samples and a majority were done in urban areas[4 6-19] (Table 1). ~~Recently, it~~ has been suggested ~~that that the prevalence of type-2 diabetes and other cardiovascular disease risk factors may increasingly become concentrated among low SES groups in India~~[20] ~~and other “poor people are disproportionately affected” by diabetes and other non-communicable diseases in low- and middle-income countries~~ [21], ~~although to date the the empirical evidence in the from Indian context in support of this hypothesis remains limited.~~ The majority of Sstudies reviewed in table 1 among populations from a few geographic regions in India have provided some evidence of a positive SES diabetes association between SES (defined as education, household wealth, social caste, or a composite of 2 or more markers) and diabetes among populations from selected geographic regions in India [6 11 17]; however the strength and consistency of this association across the whole of India ~~remains uncertain~~ has not previously been assessed.

Type-2 diabetes is the most common form of diabetes globally, accounting for greater than 85% of cases.[22] The incidence of type-2 diabetes is related to genetic and non-genetic components, with the latter being greatly influenced by modifiable risk

Formatted: Font: Bold

1  
2  
3  
4  
5  
6  
7  
8 factors such as obesity, diets low in fibre and high in trans fat, and physical  
9  
10 inactivity.[23-24] ~~These lifestyle behaviours themselves~~ are strongly patterned by SES  
11 [25], and may be mediators on the causal pathway between SES and the onset of type-2  
12 diabetes.[26] In high income countries, the SES-diabetes relationship appears to be  
13  
14 negative, with the poor at greatest risk. For example, strong associations have been  
15  
16 observed between poverty, low education and type-2 diabetes among African American  
17  
18 women [27-28], and among White women and men in the United States.[29] Similarly, a  
19  
20 study from Canada described an inversely graded SES-diabetes association with an odds  
21  
22 ratio of 1.9 for men (95% CI: 1.6-2.4) and 2.8 (95% CI: 2.2-3.4) for women for the  
23  
24 lowest versus highest income groups.[30] A recent meta-analysis of 23 ~~epidemiological~~  
25  
26 ~~case-control and cohort~~ studies and 43 measures of SES-diabetes association revealed an  
27  
28 overall increased risk for type-2 diabetes for low SES groups based on education,  
29  
30 occupation, and income.[31] The strength of the association, however, was less  
31  
32 consistent in low and middle income countries (LMICs), and few studies have been  
33  
34 conducted in these countries.  
35  
36

37 Concern has been raised over the anticipated rapid increase in type-2 diabetes  
38 prevalence in India.[32-33] Evidence on the secular increases in diabetes prevalence in  
39 India, however, have been limited to urban areas of Southern India[4 34-35], and have  
40  
41 focused on the mean rates of diabetes rather than how it is distributed in the population.  
42  
43

44  
45 In this paper we ~~address the need to comprehensively investigate the socioeconomic and~~  
46  
47 ~~geographic distribution of type-2 diabetes in the Indian population using a large-scale~~  
48  
49 ~~nationally representative survey. Specifically, we~~ investigate the SES-diabetes ~~relation~~  
50  
51 ~~association through the SES markers of social caste, household wealth, and education.~~ ~~in~~  
52  
53  
54  
55  
56  
57  
58  
59  
60

1  
2  
3  
4  
5  
6  
7  
8 ~~India using a large-scale nationally representative survey.~~ In addition, we investigate the  
9 ~~geographical-geographic~~ distribution of ~~the prevalence of~~ diabetes ~~at the state and local~~  
10 ~~area levels in India~~ across states and local areas along with variability in the SES-diabetes  
11 ~~association across states.~~  
12  
13  
14  
15  
16  
17

## 18 METHODS

### 19 Data source

20 We use data from the 3<sup>rd</sup> National Family Health Survey (NFHS), conducted in 29  
21 states in India between November 2005 and August 2006.[36] NFHS-3 is a major  
22 national health survey in India which collected information on a range of indicators  
23 including reproductive health, nutritional status of adults and children, utilization of  
24 health care services, and blood testing for HIV prevalence. NFHS-3 covered all states in  
25 India, which comprise nearly 99% of the population, but excluded Union Territories. The  
26 survey was designed to provide estimates of key indicators (except HIV prevalence) for  
27 each state by urban and rural areas.  
28  
29  
30  
31  
32  
33  
34  
35  
36

### 37 Survey design

38 A uniform multistage sampling strategy was adopted in all states, with separate  
39 sampling in urban and rural areas.[37-38] In rural areas, a two stage sample was carried  
40 out using a list of villages from the 2001 census as the sampling frame. In the first stage,  
41 a stratified sample of villages was drawn with probability proportional to the size of the  
42 village. In the second stage, a random selection of households was drawn in each village  
43 from a complete list of households compiled during field visits carried out in each  
44 sampled village. In urban areas, a similar procedure was implemented beginning with a  
45  
46  
47  
48  
49  
50  
51  
52  
53  
54  
55  
56  
57  
58  
59  
60

1  
2  
3  
4  
5  
6  
7  
8 stratified random sample of municipal wards based on the 2001 census. Next, one census  
9 enumeration block (150-200 households) was selected from within wards using  
10 probability proportional to size. Finally, as in rural areas, field enumerators undertook a  
11 household listing operation in selected blocks and a random sample of households was  
12 made. In both rural and urban areas, 30 households were targeted for selection in each of  
13 the sampled units. The overall household response rate for NFHS-3 was 98%.<sup>[36]</sup>

14  
15  
16  
17  
18  
19  
20 All ~~ever married and never married~~ women aged 15-49 in selected households  
21 were invited to participate in the survey. In 22 states, men aged 15-54 in a random  
22 subsample of households drawn from each PSU (about 6 households per PSU)~~subsample~~  
23 of households were eligible for the men's survey. In the remaining seven states (Andhra  
24 Pradesh, Karnataka, Maharashtra, Manipur, Tamil Nadu, Uttar Pradesh, and Nagaland)  
25 all-eligible men all in selected households were invited to participate. The additional men  
26 recruited in these states was for the purpose of HIV testing to provide reliable state level  
27 estimates of HIV prevalence in certain states. Interviews were conducted in 1 of the 18  
28 Indian languages in the respondent's home and the response rates were 95% for women  
29 and 87% for men.<sup>[36]</sup> During interviews, the weights and heights of survey respondents  
30 were measured by trained field technicians using standardized measuring equipment  
31 designed for survey settings.<sup>[39]</sup>

32  
33  
34  
35  
36  
37  
38  
39  
40  
41  
42  
43 In total NFHS-3 collected information from 109,041 households, 124,385 women  
44 from age 15 to 49 years of age, and 74,369 men from age 15 to 54 years of age.<sup>[24]</sup>  
45 We restricted our analyses to adults aged 18 years and older and non-pregnant women  
46 (n=171,207). Respondents who did not report or know their diabetes status (n= 2,373~~85~~)  
47 or with incomplete information for any of the independent variables considered in the  
48  
49  
50  
51  
52  
53  
54  
55  
56  
57  
58  
59  
60

analysis (marital status, religion, caste, education, household wealth) were excluded (n=69987). ~~Main –~~Analyses were conducted on a sample of 168,135 respondents, (65,255 men and 102,880 women). Additional analyses considering body mass index (BMI) were restricted to a sample of 158,936 due to missing and/or implausible values for height and/or weight. Figure 1 provides a flow diagram detailing the NFHS sample, exclusions, and final analytic sample sizes.

Formatted: Font: Bold

### Outcome and independent variables

The primary outcome was diabetes, assessed on the basis of self-reports by survey respondents. ~~Markers of S~~socioeconomic status ~~was measured by~~were social caste, ~~education, and~~household wealth, ~~and education~~. Social caste was reported by the household head. The categories were Other Caste, Scheduled caste, Scheduled tribe, Other Backward Class, and No Caste. Other Caste is a heterogeneous group that is traditionally viewed as having higher social status. ~~–~~Scheduled castes and scheduled tribes are considered lower, socially marginalized groups in India.[40] ~~Education was specified as no education, primary, secondary, or higher education.~~ Household wealth was defined by an index based on indicators of asset ownership and housing characteristics.[41] This index has been developed and validated in a number of countries to be a robust measure of wealth and has been found to be consistent with measures of income and expenditure.[42] Briefly, the measure was constructed as follows. Information on 33 indicators of housing characteristics (e.g., type of windows and flooring, water and sanitation facilities) and assets (e.g., ownership of home, car, computer, mobile phone) were weighted and combined with weights derived from a principal component analysis procedure.[36] The resulting variable was standardized to a

mean of 0 and standard deviation of 1 and using this index the household population was divided into fifths from poorest to richest. Education was categorized in four levels as no education, primary, secondary, or higher education.

Control variables Background characteristics included age, gender, religion, marital status, place of residence, and BMI. Age was defined in 10 year categories and centred about its mean (32 years) in regression models. Gender was based on self-report. Religion was categorized as Hindu, Muslim, Sikh, Buddhist, or other religion. Marital status was defined as single, married, widowed, or separated. Place of residence (rural or urban) was defined according to the 2001 Census. BMI (in kg/m<sup>2</sup>; weight in kilograms divided by the square of height in meters) was calculated for all survey respondents with valid measurements for weight and height. BMI was classified according to the following categories based on risk of type 2 diabetes and cardiovascular disease in Asian populations; less than 18.5 kg/m<sup>2</sup> (underweight); 18.5-22.93 kg/m<sup>2</sup> (acceptable risk); 23-27.45 kg/m<sup>2</sup> (increased risk); and 27.5 kg/m<sup>2</sup> or greater (high risk).[43]

### Analysis

To account for the complex survey design, we employed multilevel logistic regression to model the probability of diabetes.[44] A three-level model was specified with a binary response ( $y$ , diabetes or not) for individual  $i$  in local area (village or census block primary sampling units)  $j$  in state  $k$ . The outcome diabetes,  $\Pr(y_{ijk} = 1)$ , was assumed to be binomially distributed  $y_{ijk} \sim \text{Binomial}(1, \pi_{ijk})$  with probability  $\pi_{ijk}$  related to the set of independent variables  $X$  and a random effect for each level by a logit link function:

$$\text{Logit}(\pi_{ijk}) = \beta_0 + \beta X_{ijk} + v_{0k} + u_{0jk} \quad (\text{Equation 1})$$

1  
2  
3  
4  
5  
6  
7  
8  
9  
10  
11  
12  
13  
14  
15  
16  
17  
18  
19  
20  
21  
22  
23  
24  
25  
26  
27  
28  
29  
30  
31  
32  
33  
34  
35  
36  
37  
38  
39  
40  
41  
42  
43  
44  
45  
46  
47  
48  
49  
50  
51  
52  
53  
54  
55  
56  
57  
58  
59  
60

The right hand side of the equation consists of the fixed part linear predictor ( $\beta_0 + \beta X_{ijk}$ ) and random intercepts attributable to ~~local areas~~ ( $u_{0jk}$ ) ~~and~~ states ( $v_{0k}$ ) and local areas ( $u_{0jk}$ ). The intercept,  $\beta_0$  represents the log odds of diabetes in the reference group, and the  $\beta$ -coefficients represent the differential in the log odds of diabetes compared to the reference group defined for each independent variable. Coefficients were exponentiated and presented as odds ratios for interpretation. The random intercepts are assumed to be independently and identically distributed and have variances estimated for ~~local areas~~ ( $\sigma_u^2$ ) ~~and~~ states ( $\sigma_v^2$ ) and local areas ( $\sigma_u^2$ ).<sup>[45]</sup> The variance parameters quantify heterogeneity in the log odds of diabetes at each level, after taking into account individual characteristics and place of residence in the fixed part. We expressed the variances at each level as a percentage of their contribution to the total variance from an initial model adjusting for age and gender only and from a final model accounting for all covariates.

We specified a sequence of six models during analyses. In the first three models, one SES marker (social caste, household wealth, education) was added to a model which adjusted for background characteristics (age, gender, religion, and place of residence). In the fourth mutually adjusted model, all SES markers were included along with background characteristics from the previous models. In the fifth model, BMI was included with markers of SES and background characteristics from model 4. In the sixth model, we also tested whether the association between household wealth varied across states in terms of strength or direction, given that different states vary tremendously by levels of economic development and could be considered at different levels of epidemiological transition. In

order to test this between state variability we expanded Equation 1 to allow the slope of household wealth to vary across states:

$$\text{Logit}(\pi_{ijk}) = \beta_0 + \beta_{1k} \text{wealth}_{ijk} + \beta X_{ijk} + v_{0k} + v_{1k} + u_{0jk} \quad \text{(Equation 2)}$$

The key feature of Equation 2 is that the effect of wealth on self-reported diabetes in state

$k$  consists of the overall average effect across all states ( $\beta_1$ ), plus a state-specific ( $v_{1k}$ )

differential in this effect. We summarized and presented the results of this model as the

odds ratio for self-reported diabetes overall in India and for each state given a 1-quintile

increase in household wealth and conditional on all covariates from model 5. Additional

analyses were carried out separately for male and female samples using an identical

sequence of models (with the exclusion of gender as a background characteristic).

Estimation of Models models was done were estimated via using Markov Chain Monte

Carlo (MCMC) simulation using and the statistical software *MLwiN*. [46-47]

## RESULTS

Characteristics of survey respondents by their self-reported diabetes status are given in **Table 21**. The overall prevalence of diabetes in this sample was 1.5% and this was higher in urban areas and among men (diabetes prevalence 2.0 % in urban v 1.0% in rural; 1.8% in men v 1.3% in women). Diabetes prevalence increased with age (7.5% in 50-54y v 0.3% in 18-29y), education (1.9% in higher v 1.0% in no education), household wealth (2.5% in richest v 0.4% in poorest), and BMI (4.8% in 27.5+ kg/m<sup>2</sup> v 0.6% in <18.5 kg/m<sup>2</sup>). At the state level, the prevalence of diabetes varied between 0.3% in Rajasthan and 3.3% in Kerala and was generally higher in Southern and Eastern states (Figure 21).

Formatted: Lowered by 7 pt

Formatted: Font: Italic

Formatted: Lowered by 5 pt



1  
2  
3  
4  
5  
6  
7  
8  
9  
10  
11  
12  
13  
14  
15  
16  
17  
18  
19  
20  
21  
22  
23  
24  
25  
26  
27  
28  
29  
30  
31  
32  
33  
34  
35  
36  
37  
38  
39  
40  
41  
42  
43  
44  
45  
46  
47  
48  
49  
50  
51  
52  
53  
54  
55  
56  
57  
58  
59  
60

In separate models that adjusted for age, marital status, religion, and place of residence, statistically significant associations were observed between SES and self-reported diabetes for each of the primary indicators-markers of SES in this study: social caste, education, and household wealth, and education. Compared to the other caste group, scheduled castes, scheduled tribes, and other backward classes had reduced odds of having diabetes with odds ratios of 0.81 (95% CI: 0.71–0.94), 0.57 (95% CI: 0.46–0.70), and 0.84 (95% CI: 0.75–0.94), respectively (**Table 32, Models 1-3**). Education showed a graded relation with diabetes and an odds ratio of 1.87 (95% CI: 1.61–2.18) for those with higher education versus those with no education. Household wealth showed a graded association with diabetes with individuals from the richest households having an odds ratio for diabetes of 4.04 (95% CI: 3.08–5.30) compared to those from the poorest households.

The effects of social caste and education were attenuated in the mutually adjusted model (model 4), suggesting that their independent effects on self-reported diabetes were at least partially mediated by the inclusion of household in this model. T—The reduced odds for diabetes remained consistent for scheduled tribes versus other caste groups (OR 0.72, 95% CI: 0.58–0.90) as did an increased odds for those with secondary education versus no education (OR 1.18, 95% CI: 1.04–1.35), however the graded relation with education was less consistent. In separate mutually adjusted models that were stratified by gender, education showed a graded association in men although it was not statistically significant with the odds ratio for diabetes men found to be 1.27 (95% CI: 0.98-1.70) for men with higher versus no education (Supplemental Table 1). Among women, those with secondary education continued to show an increased odds of self-reported diabetes

Formatted: Font: Bold

1  
2  
3  
4  
5  
6  
7  
8  
9  
10  
11  
12  
13  
14  
15  
16  
17  
18  
19  
20  
21  
22  
23  
24  
25  
26  
27  
28  
29  
30  
31  
32  
33  
34  
35  
36  
37  
38  
39  
40  
41  
42  
43  
44  
45  
46  
47  
48  
49  
50  
51  
52  
53  
54  
55  
56  
57  
58  
59  
60

compared to those with no education (OR 1.28, 95% CI: 1.08-1.50). Overall, ~~the~~  
strong and graded relation between household wealth and diabetes remained consistent in  
this model~~model 4~~ with an odds ratio for diabetes of 3.65 (95% CI: 2.83, 4.78) for the  
richest versus the poorest groups; similar associations were found in the gender-specific  
models (Supplemental Table 1). Type-2 diabetes is strongly influenced by body  
weight.[48-50] Therefore, BMI was added to ~~the final model~~ model 5 to control for  
potential confounding of the SES-diabetes relationship in this sample. In addition, BMI  
was added separately in this model because its inclusion resulted in the reduction of  
sample size by ~5% due to missing values for BMI. The odds ratios for caste and  
education remained consistent between the mutually adjusted model and final model  
which included BMI. The odds ratios for household wealth were further attenuated in the  
final model, however the positive graded association remained statistically significant  
with an adjusted odds ratio for those in the richest compared to the poorest households of  
2.58 (95% CI: 1.99, ~~3.40~~).

Our analyses revealed dramatic variation in the prevalence of diabetes between  
states and local areas in India (**Table 43**). In an initial multilevel model adjusted for age  
and gender, states and local areas (defined as villages in rural areas and census blocks in  
urban areas) contributed 5.9% and 10.8%, respectively, to the total variation in diabetes.  
The addition of socioeconomic and demographic characteristics along with BMI to the  
model reduced the variance in diabetes attributed to local areas by 41% to 6.4% but the  
variation attributed to states was relatively unchanged at 5.4%.

Overall in India, the log odds for diabetes for the reference category (a 32 year old  
married women, with no education, BMI <18.5 kg/m<sup>2</sup>, belonging to the other caste group,

1  
2  
3  
4  
5  
6  
7  
8 in the poorest fifth of households, and living in a rural area) was -6.13 or a 0.22%  
9 probability of diabetes. Compared to this national reference point, being a resident of  
10 several Southern and Northeastern states was associated with a statistically significant  
11 increase in the odds of diabetes (**Figure 34**). The odds ratios for self-reported diabetes  
12 these states were: 2.29 (Tripura), 1.69 (Tamil Nadu), 1.69 (Kerala), 1.71 (Goa), 1.49  
13 (Andhra Pradesh), and 1.56 (West Bengal). In contrast being resident of the states of  
14 Rajasthan, Jammu & Kashmir, Uttar Pradesh, Punjab, Madhya Pradesh, and Assam in  
15 Northern and Central India was associated with a statistically significant decrease (OR <  
16 1.0) in the odds of reporting diabetes~~self-reported diabetes~~.

17  
18  
19  
20  
21  
22  
23  
24  
25  
26 In order to assess the variability in the SES-diabetes association across states in  
27 India, a final model (model 6) was specified to allow the odds ratio for diabetes for a one-  
28 quintile increase in household wealth to vary across states. In this model, the overall  
29 odds ratio for diabetes in India for a one-quintile increase in household wealth was 1.31  
30 (95% CI: 1.20-1.42) (Figure 4). In 15 states, the association was stronger than the  
31 national average; varying between an odds ratio of 1.33 in Rajasthan and 1.55 in Jammu  
32 & Kashmir. Although the association was less than the national average in 14 states, it  
33 was found to be positive in 28/29 (97%) states and statistically significant in 20/29  
34 (69%). Only in West Bengal was an inverse association observed, but it was not  
35 statistically significant (OR 0.95 95% CI: 0.83-1.09). Odds ratios and 95% CI for the  
36 overall association and across all states are presented in Supplemental Table 2. In  
37 summary, the association between household wealth and self-reported diabetes was  
38 consistent across the states both in direction and magnitude.  
39  
40  
41  
42  
43  
44  
45  
46  
47  
48  
49  
50  
51  
52  
53  
54  
55  
56  
57  
58  
59  
60

Formatted: Font: Bold

Formatted: Font: Bold

1  
2  
3  
4  
5  
6  
7  
8  
9  
10  
11  
12  
13  
14  
15  
16  
17  
18  
19  
20  
21  
22  
23  
24  
25  
26  
27  
28  
29  
30  
31  
32  
33  
34  
35  
36  
37  
38  
39  
40  
41  
42  
43  
44  
45  
46  
47  
48  
49  
50  
51  
52  
53  
54  
55  
56  
57  
58  
59  
60

We conducted several sensitivity analyses to assess the consistency of our findings. First, we examined whether the observed associations were related to respondents' awareness and knowledge about diabetes. To do so, we considered responses to the question, "Do you have diabetes?" as a categorical variable, comparing "yes" (diabetic)-and "don't know" (unknown) versus "no" (non-diabetic) across the same set of independent variables using a multinomial logistic model. Associations between SES variables and positive reports of diabetes from this model, which included the possibility that respondents were unaware of their diabetes status, were nearly identical to findings from the logistic model which excluded those with unknown diabetes status (**Supplemental Table 34**). The multinomial model also revealed that the richer and more highly educated respondents were less likely to report unknown "do not know" as their diabetes-status (compared to non-diabetic "no"). In addition, we examined BMI across the three categories of diabetes status (**Figure 53**). This revealed that those reporting "do not know" with unknown diabetes had the lowest BMI (mean 20.9, SD 3.7) which was largely consistent with the non-diabetic "no" group (mean 21.1, SD 3.9) and substantially lower than those reporting "yes" to diabetes those with self-reported diabetes (mean 24.4, SD 4.9). Finally, we examined interactions between socioeconomic variables (caste, education, wealth) and diabetes by residential location. Tests of these interactions were not statistically significant (P=0.20 for caste; P=0.72 for education; P=0.66 for wealth).

## DISCUSSION

In this study, we have three key findings. First, measures of SES were positively associated with self-reported diabetes in the NFHS-3. Although the observed effects of

1  
2  
3  
4  
5  
6  
7  
8  
9  
10  
11  
12  
13  
14  
15  
16  
17  
18  
19  
20  
21  
22  
23  
24  
25  
26  
27  
28  
29  
30  
31  
32  
33  
34  
35  
36  
37  
38  
39  
40  
41  
42  
43  
44  
45  
46  
47  
48  
49  
50  
51  
52  
53  
54  
55  
56  
57  
58  
59  
60

caste and education were largely attenuated in fully adjusted models, the effect of household wealth remained positive, graded and statistically significant even after controlling for BMI. Second, we observed a large variation in the prevalence of diabetes between local areas and States in India. A few Southern and northeastern states were associated with a higher risk for reporting diabetes while several northern and central states were at lower risk after adjusting for individual characteristics and place of residence. Lastly, the observed association between household wealth and self-reported diabetes was consistent, positive, and statistically significant across a majority of states in India.

There are a few limitations to our study. First, the outcome was defined on the basis of self-reported diabetes, although interviews were conducted in person using a standardized instrument. Previous research has shown good agreement for self-reported diabetes when compared to medical records in a US population,<sup>[51]</sup> and that that self-reported health conditions demonstrate the expected relationship with SES in India.<sup>[52]</sup> In addition, our sensitivity analyses considering respondents who reported “~~did not know~~unknown” for ~~their~~ diabetes status were nearly identical to the main analyses. We did find, however, evidence that higher SES groups were less likely to report “did not know” as compared to “no”, which has been suggested previously on studies using self-reports of diabetes status in India.<sup>[6]</sup> However, the “~~did not know~~unknown” group was more similar in terms of BMI, education, and wealth to the “~~non~~non-diabetic” rather than diabetic“yes” group. In addition, our findings of positive SES-diabetes associations were consistent with several studies identified in our literature review which used blood glucose measurements for the assessment of diabetes status (summarized in Table 1).

1  
2  
3  
4  
5  
6  
7  
8 Lastly, although our sample was relatively young (<55 y for men and <50 y for women)  
9 it is representative of the young population of profile of India; 84% of the Indian adult  
10 population (18-69 y) and 47% of the total Indian population at all ages fall within the  
11 ages covered by this study.[53]. Our study does exclude approximately 12% of the Indian  
12 population (women over the age of 50 and men over the age of 55) due to the sample  
13 design of the NFHS.—The prevalence of diabetes increases with age and whether a  
14 similar SES-diabetes relationship exists among middle and older age groups in all parts  
15 India is not clear, although our findings are consistent with previous studies which have  
16 included older ages.

17  
18  
19  
20  
21  
22  
23  
24  
25  
26 Our findings of positive SES-diabetes associations are consistent with previous  
27 studies done in different parts of India. For example, an analysis of rural participants  
28 from the Indian Migration Study, which sampled primarily from four large states in the  
29 north, centre, and south of India [17], identified a positive SES-diabetes gradient among  
30 men (8.0% prevalence in high SES group v 1.8% in low SES group), and a weaker  
31 positive SES-diabetes association that was not statistically significant among women  
32 (5.1% v 3.9%). In addition, a study done in an urban setting in Madras (Chennai) found  
33 an odds ratio for diabetes of 2.2 (95% credible-confidence interval [CI]: 1.7-2.7) for high  
34 v low SES groups.[11] One larger study conducted in urban and rural surveillance  
35 locations in Northern, Southern, Eastern, and Western/Central India identified an odds  
36 ratio of 3.0 (95% CI: 2.5-3.7) for self-reported diabetes for those with graduate level  
37 education versus those without formal schooling.[6] Importantly, these studies were  
38 limited to selected geographical areas or cities in India. Our study has added to this  
39  
40  
41  
42  
43  
44  
45  
46  
47  
48  
49  
50  
51  
52  
53  
54  
55  
56  
57  
58  
59  
60

1  
2  
3  
4  
5  
6  
7  
8 literature using a national population health survey with good coverage in rural areas  
9 across India.

10  
11  
12 Previous research in India has identified a strong positive relation between SES  
13 and BMI among women and men in India. [54-56] These studies are important because  
14 they have used similar markers of SES in the Indian context along with an objectively  
15 defined outcome (height and weight were measured in NFHS and not self-reported).  
16 BMI (along with other measures of body weight) is an important risk factor for the  
17 development of type 2 diabetes. [48 50 57] Therefore, the consistency of our findings of a  
18 positive SES-diabetes association after controlling for BMI is encouraging. If BMI is  
19 part of the causal pathway between SES and diabetes, attenuation in the effect size for  
20 markers of SES would be expected. The graded and positive relation between household  
21 wealth and diabetes after accounting for BMI suggests that there are additional effects of  
22 household wealth on diabetes that are not mediated by BMI. The effects of social caste  
23 and education were largely attenuated after the inclusion of household wealth and prior to  
24 the inclusion of BMI. Household wealth was the strongest socioeconomic factor  
25 associated with self-reported diabetes, suggesting that social and behavioural changes  
26 associated with diabetes in India may be more closely related to increasing wealth and/or  
27 standard of living than educational attainment.

28  
29  
30  
31  
32  
33  
34  
35  
36  
37  
38  
39  
40  
41  
42  
43 When compared to other studies in India, the overall prevalence of diabetes in the  
44 NFHS-3 was not high. This may have resulted from a combination of using self-reports  
45 of diabetes, the younger age of the NFHS-3 target population, and sampling from the  
46 general population which included a high proportion of respondents in rural areas.  
47  
48  
49  
50 Among individuals over 30 years of age, the prevalence was 2.5% (3.0 % in men and  
51  
52  
53  
54

1  
2  
3  
4  
5  
6  
7  
8 2.2% in women). Other studies using in rural India using similar age groups and blood  
9 measurements have reported diabetes prevalence of 4% and a study from rural Andhra  
10 Pradesh found a prevalence of 12% based on combination self-report and blood  
11 measurements.[17 58]  
12  
13  
14  
15

16 The current national estimate for diabetes prevalence in India is about 7% of the  
17 adult population aged 20-79. This estimate is based on 3 relatively recent and larger  
18 scale studies using a combination of oral glucose tolerance testing and self-reports of  
19 diabetes.[4-6] There continues to be considerable uncertainty in estimates of diabetes for  
20 the whole of India due to the limited study locations (with a focus on urban areas), wide  
21 variation in survey sampling methodology, differences in diabetes diagnostic criteria, and  
22 age groups studied. These differences in study design have hindered direct comparison  
23 of the prevalence between studies, across regions and over time. The NFHS-3 provides  
24 and important benchmark because it is the first nationally-representative survey of  
25 diabetes in India. Even if the prevalence estimates of diabetes have been underestimated  
26 in the NFHS-3, the observed SES-diabetes associations are plausible and important.  
27 Previous studies have largely overlooked the importance of socioeconomic status  
28 markers, which may be a key determinant of diabetes. Further large-scale population-  
29 based surveys can be strengthened by using simple finger-prick blood glucose  
30 measurements in addition to self-reports.  
31  
32  
33  
34  
35  
36  
37  
38  
39  
40  
41  
42  
43  
44

45 There has been considerable concern over the rising prevalence of diabetes in  
46 India, especially with studies on migrant Indian populations suggesting that South Asians  
47 may be more susceptible to the disease. In light of current findings, it appears that, at  
48 present, the more well-off segments of the Indian population are at greatest risk. This  
49  
50  
51  
52  
53  
54



1  
2  
3  
4  
5  
6  
7  
8  
9 poses concerns on how to appropriately balance priorities to address the disease burden  
10 that afflicts the non poor versus the poor in the context of India where greater than 40%  
11 of the population continue to live in extreme poverty ~~-50 percent on~~ less than \$1.25 per  
12 day~~[48] of the population are poor~~.<sup>[59]</sup>  
13  
14  
15  
16  
17

### 18 ACKNOWLEDGEMENTS

19 SVS and DJC planned the study. DJC conducted statistical analyses and drafted the  
20 manuscript with supervision from SVS. Both authors participated in interpretation of the  
21 results and critical revisions of the manuscript.  
22  
23  
24

25 The NFHS data are available through the Measure DHS project at [www.measuredhs.com](http://www.measuredhs.com).  
26  
27  
28  
29  
30  
31  
32  
33  
34  
35  
36  
37  
38  
39  
40  
41  
42  
43  
44  
45  
46  
47  
48  
49  
50  
51  
52  
53  
54

## REFERENCES

1. Rao KS, Mukherjee NR, Rao KV. A survey of diabetes mellitus in a rural population of India. *Diabetes* 1972;**21**:1192-6.
2. Gupta OP, Joshi MH, Dave SK. Prevalence of diabetes in India. *Adv Metab Disord* 1978;**9**:147-65.
3. Ahuja MM. Recent contributions to the epidemiology of diabetes mellitus in India. *Int J Diab Developing Countires* 1991;**11**:5-9.
4. Ramachandran A, Snehalatha C, Kapur A, et al. High prevalence of diabetes and impaired glucose tolerance in India: National Urban Diabetes Survey. *Diabetologia* 2001;**44**:1094-101.
5. Sadikot SM, Nigam A, Das S, et al. The burden of diabetes and impaired glucose tolerance in India using the WHO 1999 criteria: prevalence of diabetes in India study (PODIS). *Diabetes Res Clin Pract* 2004;**66**:301-7.
6. Mohan V, Mathur P, Deepa R, et al. Urban rural differences in prevalence of self-reported diabetes in India--the WHO-ICMR Indian NCD risk factor surveillance. *Diabetes Res Clin Pract* 2008;**80**:159-68.
7. Singh RB, Sharma JP, Rastogi V, et al. Social class and coronary disease in rural population of north India. The Indian Social Class and Heart Survey. *Eur Heart J* 1997;**18**:588-95.
8. Singh RB, Niaz MA, Thakur AS, Janus ED, Moshiri M. Social class and coronary artery disease in a urban population of North India in the Indian Lifestyle and Heart Study. *Int J Cardiol* 1998;**64**:195-203.
9. Singh RB, Bajaj S, Niaz MA, Rastogi SS, Moshiri M. Prevalence of type 2 diabetes mellitus and risk of hypertension and coronary artery disease in rural and urban population with low rates of obesity. *Int J Cardiol* 1998;**66**:65-72.
10. Singh RB, Beegom R, Mehta AS, et al. Social class, coronary risk factors and undernutrition, a double burden of diseases, in women during transition, in five Indian cities. *Int J Cardiol* 1999;**69**:139-47.
11. Ramachandran A, Snehalatha C, Vijay V, King H. Impact of poverty on the prevalence of diabetes and its complications in urban southern India. *Diabet Med* 2002;**19**:130-5.
12. Gupta R, Gupta VP, Sarna M, Prakash H, Rastogi S, Gupta KD. Serial epidemiological surveys in an urban Indian population demonstrate increasing coronary risk factors among the lower socioeconomic strata. *J Assoc Physicians India* 2003;**51**:470-7.
13. Reddy KS, Prabhakaran D, Jeemon P, et al. Educational status and cardiovascular risk profile in Indians. *Proc Natl Acad Sci U S A* 2007;**104**:16263-8.
14. Ajay VS, Prabhakaran D, Jeemon P, et al. Prevalence and determinants of diabetes mellitus in the Indian industrial population. *Diabetic Medicine* 2008;**25**:1187-94.
15. Vijayakumar G, Arun R, Kutty VR. High prevalence of type 2 diabetes mellitus and other metabolic disorders in rural Central Kerala. *J Assoc Physicians India* 2009;**57**:563-7.
16. Gupta R, Kaul V, Agrawal A, Guptha S, Gupta VP. Cardiovascular risk according to educational status in India. *Prev Med* 2010;**51**:408-11.

17. Kinra S, Bowen LJ, Lyngdoh T, et al. Sociodemographic patterning of non-communicable disease risk factors in rural India: a cross sectional study. *BMJ* 2010;**341**:c4974.
18. Samuel P, Antonisamy B, Raghupathy P, Richard J, Fall CH. Socio-economic status and cardiovascular risk factors in rural and urban areas of Vellore, Tamilnadu, South India. *Int J Epidemiol* 2012.
19. Zaman MJ, Patel A, Jan S, et al. Socio-economic distribution of cardiovascular risk factors and knowledge in rural India. *Int J Epidemiol* 2012.
20. Jeemon P, Reddy KS. Social determinants of cardiovascular disease outcomes in Indians. *Indian J Med Res* 2010;**132**:617-22.
21. Beaglehole R, Bonita R, Alleyne G, et al. UN High-Level Meeting on Non-Communicable Diseases: addressing four questions. *Lancet* 2011;**378**:449-55.
22. World Health Organization. Prevention of diabetes mellitus. Report of a WHO Study Group. WHO Technical Report Series 844. Geneva: World Health Organization, 1994.
23. Hu FB, Manson JE, Stampfer MJ, et al. Diet, lifestyle, and the risk of type 2 diabetes mellitus in women. *N Engl J Med* 2001;**345**:790-7.
24. Psaltopoulou T, Ilias I, Alevizaki M. The role of diet and lifestyle in primary, secondary, and tertiary diabetes prevention: a review of meta-analyses. *Rev Diabet Stud* 2010;**7**:26-35.
25. Adler NE, Newman K. Socioeconomic disparities in health: pathways and policies. *Health Aff (Millwood)* 2002;**21**:60-76.
26. Brown AF, Ettner SL, Piette J, et al. Socioeconomic position and health among persons with diabetes mellitus: a conceptual framework and review of the literature. *Epidemiol Rev* 2004;**26**:63-77.
27. Sims M, Diez Roux AV, Boykin S, et al. The socioeconomic gradient of diabetes prevalence, awareness, treatment, and control among african americans in the jackson heart study. *Ann Epidemiol* 2011;**21**:892-8.
28. Krishnan S, Cozier YC, Rosenberg L, Palmer JR. Socioeconomic status and incidence of type 2 diabetes: results from the Black Women's Health Study. *Am J Epidemiol* 2010;**171**:564-70.
29. Robbins JM, Vaccarino V, Zhang H, Kasl SV. Socioeconomic status and type 2 diabetes in African American and non-Hispanic white women and men: evidence from the Third National Health and Nutrition Examination Survey. *Am J Public Health* 2001;**91**:76-83.
30. Dinca-Panaitescu S, Dinca-Panaitescu M, Bryant T, Daiski I, Pilkington B, Raphael D. Diabetes prevalence and income: Results of the Canadian Community Health Survey. *Health Policy* 2011;**99**:116-23.
31. Agardh E, Allebeck P, Hallqvist J, Moradi T, Sidorchuk A. Type 2 diabetes incidence and socio-economic position: a systematic review and meta-analysis. *Int J Epidemiol* 2011;**40**:804-18.
32. Mohan V, Sandeep S, Deepa R, Shah B, Varghese C. Epidemiology of type 2 diabetes: Indian scenario. *Indian J Med Res* 2007;**125**:217-30.
33. Shaw JE, Sicree RA, Zimmet PZ. Global estimates of the prevalence of diabetes for 2010 and 2030. *Diabetes Res Clin Pract* 2010;**87**:4-14.

- 1
  - 2
  - 3
  - 4
  - 5
  - 6
  - 7
  - 8
  - 9
  - 10
  - 11
  - 12
  - 13
  - 14
  - 15
  - 16
  - 17
  - 18
  - 19
  - 20
  - 21
  - 22
  - 23
  - 24
  - 25
  - 26
  - 27
  - 28
  - 29
  - 30
  - 31
  - 32
  - 33
  - 34
  - 35
  - 36
  - 37
  - 38
  - 39
  - 40
  - 41
  - 42
  - 43
  - 44
  - 45
  - 46
  - 47
  - 48
  - 49
  - 50
  - 51
  - 52
  - 53
  - 54
  - 55
  - 56
  - 57
  - 58
  - 59
  - 60
34. Mohan V, Deepa M, Deepa R, et al. Secular trends in the prevalence of diabetes and impaired glucose tolerance in urban South India--the Chennai Urban Rural Epidemiology Study (CURES-17). *Diabetologia* 2006;**49**:1175-8.
35. Ramachandran A, Snehalatha C, Latha E, Vijay V, Viswanathan M. Rising prevalence of NIDDM in an urban population in India. *Diabetologia* 1997;**40**:232-7.
36. International Institute for Population Sciences (IIPS) and Macro International. *National Family Health Survey (NFHS-3), 2005-06: India: Volume I*. Mumbai: IIPS, 2007.
37. International Institute for Population Sciences (IIPS) and Macro International. *National Family Health Survey (NFHS-3), 2005-06: India: Volume II*. Mumbai: IIPS, 2007.
38. Macro International Incorporated. *Sampling Manual*. Calverton, Maryland: DHS-III Basic Documentation No. 6, 1996.
39. ICF Macro. *Demographic and Health Survey Interviewer's Manual*. MEASURE DHS Basic Documentation No. 2. Calverton, Maryland, U.S.A.: ICF Macro, 2011.
40. Chitnis S. Definition of the terms scheduled castes and scheduled tribes: a crisis of ambivalence. In: Pai Panandiker VA, ed. *The Politics of Backwardness: Reservation Policy in India*. New Delhi, India: Centre for Policy Research, 1997.
41. Rutstein SO, Johnson K. *The DHS Wealth Index*. DHS Comparative Reports No. 6. Calverton, Maryland, USA: ORC Macro, 2004.
42. Filmer D, Pritchett L. Estimating wealth effects without expenditure data-or tears: an application to education enrollments in states of India *Demography* 2001;**37**:155-74.
43. World Health Organization (WHO) Expert Consultation. Appropriate body-mass index for Asian populations and its implications for policy and intervention strategies. *Lancet* 2004;**363**:157-63.
44. Subramanian SV, Jones K, Duncan C. Multilevel methods for public health research. In: Kawachi I, Berkman LF, eds. *Neighborhoods and Health*. New York, NY: Oxford University Press, 2003:65-111.
45. Goldstein H. *Multilevel statistical models*. 3rd ed. London: Arnold, 2003.
46. Rasbash J, Browne WJ, Healy M, Cameron B, Charlton C. *MLwiN Version 2.20*. Bristol, UK: Centre for Multilevel Modelling, University of Bristol, 2010.
47. Browne WJ. *MCMC estimation in MLwiN*. Bristol, UK: Centre for Multilevel Modelling, University of Bristol, 2009.
48. Koh-Banerjee P, Wang Y, Hu FB, Spiegelman D, Willett WC, Rimm EB. Changes in body weight and body fat distribution as risk factors for clinical diabetes in US men. *Am J Epidemiol* 2004;**159**:1150-9.
49. Vazquez G, Duval S, Jacobs DR, Jr., Silventoinen K. Comparison of body mass index, waist circumference, and waist/hip ratio in predicting incident diabetes: a meta-analysis. *Epidemiol Rev* 2007;**29**:115-28.
50. Guh DP, Zhang W, Bansback N, Amarsi Z, Birmingham CL, Anis AH. The incidence of co-morbidities related to obesity and overweight: a systematic review and meta-analysis. *BMC Public Health* 2009;**9**:88.
51. Okura Y, Urban LH, Mahoney DW, Jacobsen SJ, Rodeheffer RJ. Agreement between self-report questionnaires and medical record data was substantial for diabetes,

- 1  
2  
3  
4  
5  
6  
7  
8 hypertension, myocardial infarction and stroke but not for heart failure. *J Clin Epidemiol* 2004;**57**:1096-103.
- 9  
10  
11 52. Subramanian SV, Subramanyam MA, Selvaraj S, Kawachi I. Are self-reports of  
12 health and morbidities in developing countries misleading? Evidence from India.  
13 *Soc Sci Med* 2009;**68**:260-5.
- 14  
15 53. Registrar General of India. Census of India 2001: C-13 Single year age returns by  
16 residence and sex. 2001. [http://www.censusindia.gov.in/Tables\\_Published/C-](http://www.censusindia.gov.in/Tables_Published/C-Series/c_series_tables_2001.aspx)  
17 [Series/c\\_series\\_tables\\_2001.aspx](http://www.censusindia.gov.in/Tables_Published/C-Series/c_series_tables_2001.aspx).
- 18  
19 54. Subramanian SV, Smith GD. Patterns, distribution, and determinants of under- and  
20 overnutrition: a population-based study of women in India. *Am J Clin Nutr*  
21 2006;**84**:633-40.
- 22  
23 55. Ackerson LK, Kawachi I, Barbeau EM, Subramanian SV. Geography of underweight  
24 and overweight among women in India: a multilevel analysis of 3204  
25 neighborhoods in 26 states. *Econ Hum Biol* 2008;**6**:264-80.
- 26  
27 56. Subramanian SV, Perkins JM, Khan KT. Do burdens of underweight and overweight  
28 coexist among lower socioeconomic groups in India? *Am J Clin Nutr*  
29 2009;**90**:369-76.
- 30  
31 57. Colditz GA, Willett WC, Rotnitzky A, Manson JE. Weight gain as a risk factor for  
32 clinical diabetes mellitus in women. *Ann Intern Med* 1995;**122**:481-6.
- 33  
34 58. Chow CK, Raju PK, Raju R, et al. The prevalence and management of diabetes in  
35 rural India. *Diabetes Care* 2006;**29**:1717-8.
- 36  
37 59. World Bank. Poverty headcount ratio at \$1.25 a day (PPP) (% of population). 2012.  
38 <http://data.worldbank.org/indicator/SI.POV.DDAY?page=1>.
- 39  
40  
41  
42  
43  
44  
45  
46  
47  
48  
49  
50  
51  
52  
53  
54  
55  
56  
57  
58  
59  
60

**Table 1:** Overview of studies reporting prevalence of type-2 diabetes by markers of socioeconomic status (SES) and the association between increasing SES and diabetes in India

Formatted: Not Highlight

| Author           | Study period | Coverage | Setting  | Age   | Sample size | Diabetes assessment           | SES marker | Gender   | Diabetes prevalence: low SES (l); high SES (h) | SES-diabetes association: Odds ratio (95% confidence interval), high SES vs low SES |
|------------------|--------------|----------|----------|-------|-------------|-------------------------------|------------|----------|------------------------------------------------|-------------------------------------------------------------------------------------|
| Singh[7]         | 1994         | Local    | Rural    | 25-64 | 1769        | blood glucose                 | Composite  | Male     | 0.9% (l); 6.1% (h)*                            | -                                                                                   |
|                  |              |          |          |       |             |                               |            | Female   | 0.9% (l); 6.9% (h)*                            | -                                                                                   |
| Singh[8]         | 1994         | Local    | Rural    | 25-64 | 1806        | blood glucose                 | Composite  | Male     | 2.5% (l); 8.6% (h)*                            | 2.03 (1.86-2.51)*                                                                   |
|                  |              |          |          |       |             |                               |            | Female   | 1.2% (l); 6.9% (h)*                            | 1.97 (1.67-2.36)*                                                                   |
| Singh[9]         | 1994         | Local    | Combined | 25-64 | 3575        | blood glucose                 | Composite  | Male     | -                                              | 4.07 (1.89-10.01)* (Urban)                                                          |
|                  |              |          |          |       |             |                               |            | -        | 3.75 (1.37-12.78)* (Rural)                     |                                                                                     |
|                  |              |          |          |       |             |                               |            | Female   | -                                              | 1.48 (0.64-4.00) (Urban)                                                            |
|                  |              |          |          |       |             |                               |            | -        | 2.55 (0.91-8.83) (Rural)                       |                                                                                     |
| Singh[10]        | 1998         | Regional | Urban    | 25-64 | 3257        | blood glucose                 | Composite  | Female   | 0.5% (l); 4.8% (h)*                            | -                                                                                   |
| Ramachandran[4]  | 2000         | Regional | Urban    | 20+   | 11216       | blood glucose                 | Income     | Combined | 12.5% (l); 21.6% (h)*                          | 1.43 (1.30-1.57)*; 1.16 (1.05-1.30)*                                                |
| Ramachandran[11] | 1999-2000    | Local    | Urban    | 40+   | 2383        | blood glucose, drug treatment | Income     | Combined | 12.6% (l); 25.5% (h)*                          | 2.15 (1.70-2.72)                                                                    |
| Gupta[12]        | 1999-2001    | Local    | Urban    | 20+   | 1123        | self-report                   | Education  | Male     | 6.8% (l); 7.9% (h)                             | -                                                                                   |
|                  |              |          |          |       |             |                               |            | Female   | 6.6% (l); 8.3% (h)                             | -                                                                                   |

1  
2  
3  
4  
5  
6  
7  
8  
9  
10  
11  
12  
13  
14  
15  
16  
17  
18  
19  
20  
21  
22  
23  
24  
25  
26  
27  
28  
29  
30  
31  
32  
33  
34  
35  
36  
37  
38  
39  
40  
41  
42  
43  
44  
45  
46  
47  
48  
49

|                 |           |          |          |       |           |                                             |                              |          |                               |                   |
|-----------------|-----------|----------|----------|-------|-----------|---------------------------------------------|------------------------------|----------|-------------------------------|-------------------|
| Reddy[13]       | 2002-2003 | Regional | Urban    | 20-69 | 19973     | blood glucose, drug treatment               | Education                    | Male     | 7.6% (l); 8.4% (h)            | 1.11 (0.71-1.67)  |
|                 |           |          |          |       |           |                                             |                              | Female   | 11.2% (l); 4.2% (h)*          | 0.36 (0.23-0.56)* |
| Mohan[6]        | 2003-2005 | Regional | Combined | 15-64 | 44523     | self-report                                 | Education                    | Combined | 3.4% (l); 5.6% (h)*           | 3.02 (2.45-3.71)* |
| Ajay[14]        | 2002-2003 | Regional | Urban    | 20-69 | 10930     | blood glucose, drug treatment               | Education                    | Combined | 11.6% (l); 6.9% (h)*          | 0.69 (0.54-0.89)* |
| Vijayakumar[15] | 2007      | Local    | Rural    | 18+   | 1990      | blood glucose, self-report                  | Social caste                 | Combined | 5.9% (l); 17.4% (h)           | -                 |
|                 |           |          |          |       |           |                                             | Wealth                       | Combined | 1.43 (1.04-1.95)*             |                   |
| Gupta[16]       | 1999-2003 | Local    | Urban    | 20-59 | 1289      | blood glucose, self-report                  | Education                    | Male     | 8.0% (l); 18.8% (h)*          | -                 |
|                 |           |          |          |       |           |                                             |                              | Female   | 6.0% (l); 34.7% (h)*          | -                 |
|                 |           |          |          |       |           |                                             |                              | Combined | 6.9% (l); 26.4% (h)*          | -                 |
| Kinra[17]       | 2005-2007 | Regional | Rural    | 20-69 | 1983      | blood glucose, self-report                  | Wealth                       | Male     | 1.8% (l); 8.0% (h)*           | -                 |
|                 |           |          |          |       |           |                                             |                              | Female   | 3.9% (l); 5.1% (h)            | -                 |
| Samuel[18]      | 1969-2002 | Regional | Urban    | 26-32 | 2218      | blood glucose <sup>†</sup> , drug treatment | Wealth                       | Male     | 26.2% (l); 31.9% (h)* (Urban) | -                 |
|                 |           |          |          |       |           |                                             |                              |          | 10.9% (l); 31.8% (h) (Rural)  | -                 |
|                 |           |          | Rural    |       | Female    | 12.1% (l); 30.3% (h)* (Urban)               | -                            |          |                               |                   |
|                 |           |          |          |       |           | 16.1% (l); 32.1% (h)* (Rural)               | -                            |          |                               |                   |
|                 |           |          | Combined |       | Combined  | -                                           | 2.8 (1.9-4.1)*               |          |                               |                   |
|                 |           |          | Urban    |       | Education | Male                                        | 15.0% (l); 34.7% (h) (Urban) | -        |                               |                   |

1  
2  
3  
4  
5  
6  
7  
8  
9  
10  
11  
12  
13  
14  
15  
16  
17  
18  
19  
20  
21  
22  
23  
24  
25  
26  
27  
28  
29  
30  
31  
32  
33  
34  
35  
36  
37  
38  
39  
40  
41  
42  
43  
44  
45  
46  
47  
48  
49

|           |        |                      |       |     |      |                            |        |           |                      |                       |               |
|-----------|--------|----------------------|-------|-----|------|----------------------------|--------|-----------|----------------------|-----------------------|---------------|
| Zaman[19] | 2005   | Regional             | Rural | 30+ | 4535 | blood glucose, self-report | Income |           | 25.7% (l); 19.7% (h) | -                     |               |
|           |        |                      |       |     |      |                            |        | Rural     | Female               | 31.5% (l); 32.2% (h)* | -             |
|           |        |                      |       |     |      |                            |        |           | (Urban)              |                       |               |
|           |        |                      |       |     |      |                            |        |           |                      | 19.1% (l); 50.0% (h)  | -             |
|           |        |                      |       |     |      |                            |        | Combined  | Combined             | -                     | 1.0 (0.6-1.6) |
|           |        |                      |       |     |      |                            |        |           | Male                 | 16.2% (l); 21.2% (h)* | -             |
|           |        |                      |       |     |      |                            |        |           | Female               | 12.1% (l); 15.0% (h)* | -             |
|           |        |                      |       |     |      |                            |        | Education | Male                 | 12.4% (l); 20.1% (h)* | -             |
|           | Female | 12.8% (l); 13.1% (h) | -     |     |      |                            |        |           |                      |                       |               |

Notes for Table 1: Socioeconomic status (SES) markers defined as education, household wealth, social caste, or a composite of 2 or more measures; \*P<0.05; - indicates not reported; †includes impaired glucose tolerance and impaired fasting glucose

Formatted: Underline



**Table 12:** Characteristics of survey participants and frequency distribution of self-reported diabetes in India, males and females from the 3<sup>rd</sup> National Family Health Survey

|                       | <u>Self-reported</u><br><u>Diabetes</u> |     | <u>Total</u> |
|-----------------------|-----------------------------------------|-----|--------------|
|                       | <i>n</i>                                | %   | <i>n</i>     |
| Participants          | 2439                                    | 1.5 | 168135       |
| Residence             |                                         |     |              |
| Rural                 | 818                                     | 1.0 | 86013        |
| Urban                 | 1621                                    | 2.0 | 82122        |
| Age group             |                                         |     |              |
| 18-29 y               | 266                                     | 0.3 | 76174        |
| 30-39 y               | 602                                     | 1.2 | 51132        |
| 40-49 y               | 1238                                    | 3.4 | 36402        |
| 50-54 y               | 333                                     | 7.5 | 4427         |
| Gender                |                                         |     |              |
| Male                  | 1144                                    | 1.8 | 65255        |
| Female                | 1295                                    | 1.3 | 102880       |
| Marital status        |                                         |     |              |
| Single                | 132                                     | 0.3 | 38078        |
| Married               | 2165                                    | 1.8 | 123457       |
| Widowed               | 108                                     | 2.5 | 4320         |
| Divorced or separated | 34                                      | 1.5 | 2280         |
| Religion              |                                         |     |              |
| Hindu                 | 1775                                    | 1.4 | 123411       |
| Muslim                | 340                                     | 1.6 | 21510        |
| Christian             | 213                                     | 1.4 | 14779        |
| Sikh                  | 49                                      | 1.5 | 3236         |
| Buddhist              | 34                                      | 1.4 | 2451         |
| Other                 | 28                                      | 1.0 | 2748         |
| Social Caste          |                                         |     |              |
| Other caste           | 1026                                    | 1.8 | 56063        |
| Scheduled caste       | 349                                     | 1.3 | 27677        |
| Scheduled tribe       | 167                                     | 0.8 | 21372        |
| Other backward class  | 781                                     | 1.4 | 55641        |
| No caste              | 116                                     | 1.6 | 7382         |
| Education             |                                         |     |              |
| No education          | 464                                     | 1.0 | 44856        |
| Primary               | 358                                     | 1.4 | 24969        |

1  
2  
3  
4  
5  
6  
7  
8  
9  
10  
11  
12  
13  
14  
15  
16  
17  
18  
19  
20  
21  
22  
23  
24  
25  
26  
27  
28  
29  
30  
31  
32  
33  
34  
35  
36  
37  
38  
39  
40  
41  
42  
43  
44  
45  
46  
47  
48  
49  
50  
51  
52  
53  
54  
55  
56  
57  
58  
59  
60

|                                      |      |     |       |
|--------------------------------------|------|-----|-------|
| Secondary                            | 1166 | 1.6 | 74715 |
| Higher                               | 451  | 1.9 | 23595 |
| Household wealth                     |      |     |       |
| Poorest                              | 77   | 0.4 | 17252 |
| 2 <sup>nd</sup> quintile             | 175  | 0.8 | 22948 |
| 3 <sup>rd</sup> quintile             | 278  | 0.9 | 32070 |
| 4 <sup>th</sup> quintile             | 573  | 1.4 | 42091 |
| Richest                              | 1336 | 2.5 | 53774 |
| Body mass index (kg/m <sup>2</sup> ) |      |     |       |
| <18.5                                | 243  | 0.6 | 42128 |
| 18.5-22.9                            | 703  | 0.9 | 74089 |
| 23-27.4                              | 833  | 2.7 | 31217 |
| 27.5+                                | 547  | 4.8 | 11502 |

Formatted: Superscript

Formatted: Superscript

Formatted: Superscript

**Table 32:** Associations between socioeconomic status and self-reported diabetes in India; 3<sup>rd</sup> National family health survey, 2005-6

| Variable                             | Model-adjusted for age, gender, marital status, religion, residence Models 1-3 |               | Mutually adjusted model Model 4 |               | Mutually adjusted model with BMI Model 5 |               |
|--------------------------------------|--------------------------------------------------------------------------------|---------------|---------------------------------|---------------|------------------------------------------|---------------|
|                                      | Odds ratio                                                                     | 95% CI        | Odds ratio                      | 95% CI        | Odds ratio                               | 95% CI        |
| Social Caste                         |                                                                                |               |                                 |               |                                          |               |
| Other caste                          | 1.00                                                                           |               | 1.00                            |               | 1.00                                     |               |
| Scheduled caste                      | 0.81                                                                           | (0.71 - 0.94) | 1.05                            | (0.91 - 1.21) | 1.07                                     | (0.93 - 1.24) |
| Scheduled tribe                      | 0.57                                                                           | (0.46 - 0.70) | 0.72                            | (0.58 - 0.90) | 0.73                                     | (0.57 - 0.92) |
| Other backward caste                 | 0.84                                                                           | (0.75 - 0.94) | 0.95                            | (0.85 - 1.07) | 0.96                                     | (0.86 - 1.08) |
| No caste                             | 0.89                                                                           | (0.71 - 1.11) | 0.94                            | (0.75 - 1.17) | 0.95                                     | (0.76 - 1.20) |
| Wealth                               |                                                                                |               |                                 |               |                                          |               |
| Poorest                              | 1.00                                                                           |               | 1.00                            |               | 1.00                                     |               |
| 2nd quintile                         | 1.59                                                                           | (1.20 - 2.12) | 1.57                            | (1.21 - 2.07) | 1.49                                     | (1.14 - 1.96) |
| 3rd quintile                         | 1.63                                                                           | (1.23 - 2.16) | 1.55                            | (1.21 - 2.02) | 1.39                                     | (1.07 - 1.81) |
| 4th quintile                         | 2.42                                                                           | (1.85 - 3.17) | 2.25                            | (1.76 - 2.92) | 1.79                                     | (1.40 - 2.34) |
| Richest                              | 4.04                                                                           | (3.08 - 5.30) | 3.65                            | (2.83 - 4.78) | 2.58                                     | (1.99 - 3.40) |
| Education                            |                                                                                |               |                                 |               |                                          |               |
| No education                         | 1.00                                                                           |               | 1.00                            |               | 1.00                                     |               |
| Primary                              | 1.23                                                                           | (1.06 - 1.43) | 1.06                            | (0.91 - 1.22) | 1.00                                     | (0.86 - 1.17) |
| Secondary                            | 1.68                                                                           | (1.49 - 1.90) | 1.18                            | (1.04 - 1.35) | 1.12                                     | (0.98 - 1.28) |
| Higher                               | 1.87                                                                           | (1.61 - 2.18) | 1.12                            | (0.95 - 1.32) | 1.01                                     | (0.86 - 1.20) |
| Body mass index (kg/m <sup>2</sup> ) |                                                                                |               |                                 |               |                                          |               |
| <18.5                                |                                                                                |               |                                 |               | 1.00                                     |               |
| 18.5-22.9                            | 2.93                                                                           |               |                                 |               | 1.25                                     | (1.08 - 1.46) |
| 23-27.4                              | 1.45                                                                           |               |                                 |               | 2.08                                     | (1.79 - 2.44) |
| 27.5+                                |                                                                                |               |                                 |               | 2.98                                     | (2.51 - 3.54) |

Notes: In models 1-3 one SES marker (social caste, household wealth, education) was modelled at a time while adjusting for age, gender, religion, and place of residence. In model 4, all SES markers were included along with covariates from models 1-3. In model 5, BMI was included with markers of SES and covariates from model 4.

**Table 34:** Variance in self-reported diabetes status between local areas and states in India; expressed as percentage of the contribution to the total variance in diabetes

|             | Age & gender adjusted* |       |      | Fully adjusted** |       |     |
|-------------|------------------------|-------|------|------------------|-------|-----|
|             | Variance               | SE    | %    | Variance         | SE    | %   |
| States      | 0.231                  | 0.076 | 5.9  | 0.204            | 0.068 | 5.4 |
| Local areas | 0.425                  | 0.043 | 10.8 | 0.240            | 0.041 | 6.4 |

**Notes:**

\*Multilevel model adjusted for age and gender only

\*\*Multilevel model fully adjusted for age, gender, marital status, religion, social caste, household wealth, education, body mass index, and place of residence

| State             | #       | Self-reported diabetes |              |
|-------------------|---------|------------------------|--------------|
|                   |         | Wealth OR              | 95% CI*      |
| India             | 158,936 | 1.31                   | (1.20– 1.42) |
| Jammu and Kashmir | 3,383   | 1.55                   | (1.21– 1.98) |
| Maharashtra       | 14,053  | 1.51                   | (1.27– 1.78) |
| Orissa            | 4,838   | 1.50                   | (1.24– 1.81) |
| Arunachal Pradesh | 1,798   | 1.49                   | (1.14– 1.94) |
| Uttar Pradesh     | 17,555  | 1.47                   | (1.28– 1.70) |
| Sikkim            | 2,406   | 1.46                   | (1.11– 1.92) |
| Madhya Pradesh    | 7,756   | 1.43                   | (1.19– 1.71) |
| Assam             | 3,904   | 1.43                   | (1.15– 1.77) |
| Uttaranchal       | 3,120   | 1.42                   | (1.12– 1.81) |
| Punjab            | 4,134   | 1.41                   | (1.10– 1.81) |
| Mizoram           | 2,089   | 1.40                   | (1.07– 1.85) |
| Karnataka         | 9,049   | 1.40                   | (1.19– 1.64) |
| Chhattisgarh      | 4,246   | 1.36                   | (1.14– 1.64) |
| Delhi             | 3,026   | 1.35                   | (1.05– 1.73) |
| Rajasthan         | 4,433   | 1.33                   | (1.03– 1.71) |
| Meghalaya         | 2,135   | 1.29                   | (1.03– 1.63) |
| Jharkhand         | 3,044   | 1.29                   | (1.06– 1.57) |
| Tamil Nadu        | 10,106  | 1.28                   | (1.11– 1.48) |
| Andhra Pradesh    | 11,824  | 1.25                   | (1.09– 1.45) |
| Himachal Pradesh  | 3,563   | 1.25                   | (0.97– 1.61) |
| Gujarat           | 4,322   | 1.25                   | (1.00– 1.56) |
| Goa               | 3,883   | 1.20                   | (0.98– 1.48) |
| Nagaland          | 6,350   | 1.19                   | (0.99– 1.44) |

|             |       |      |              |
|-------------|-------|------|--------------|
| Tripura     | 2,089 | 1.18 | (0.96– 1.45) |
| Manipur     | 6,941 | 1.14 | (0.95– 1.37) |
| Haryana     | 3,173 | 1.11 | (0.90– 1.38) |
| Bihar       | 3,882 | 1.10 | (0.93– 1.30) |
| Kerala      | 4,018 | 1.10 | (0.89– 1.35) |
| West Bengal | 7,816 | 0.95 | (0.83– 1.09) |

Notes: Odds ratios (OR) and 95% credible intervals (CI) adjusted for age, gender, marital status, religion, social caste, education, body mass index and place of residence.

#### FIGURE LEGENDS

**Figure 1** Flow diagram showing exclusions and final sample sizes, 2005-6 National Family Health Survey (NFHS)

Notes for figure 1: \*2,333 individuals reported unknown diabetes status; in 40 individuals diabetes status was not reported/missing. Of the 2,333 individuals who reported unknown diabetes status, 2,210 (94.7%) had complete data for BMI and were included in sensitivity analyses.

\*\*Analyses involving body mass index (BMI) as an independent variable were restricted to 158,936 individuals.

Formatted: Underline

Formatted: Font: Not Bold, English (U.S.)

**Figure 2** State level prevalence of self-reported diabetes in India for men aged 18-54 (left) and women aged 18-49 (right). Darker colours indicate higher prevalence.

Notes for figure 2: State name abbreviations: AP Andhra Pradesh; AR Arunachal Pradesh; AS Assam; BR Bihar; CT Chhattisgarh; DL Delhi; GA Goa; GJ Gujarat; HR Haryana; HP Himachal Pradesh; JK Jammu & Kashmir; JH Jharkhand; KA Karnataka; KL Kerala; MP Madhya Pradesh; MH Maharashtra; MN Manipur; ML Meghalaya; MZ Mizoram; NL Nagaland; OR Orissa; PB Punjab; RJ Rajasthan; SK Sikkim; TN Tamil Nadu; TR Tripura; UP Uttar Pradesh; UK Uttarakhand (Uttaranchal); WB West Bengal

**Figure 3** Odds ratios for self-reported diabetes by state of residence in India

Notes for figure 3: horizontal lines are 95% credible intervals; Notes for adjusted for age, gender, marital status, religion, social caste, household wealth, education, body mass index and place of residence.

**Figure 4** Odds ratio (OR) for self-reported diabetes for a one-quintile increase in household wealth for men (aged 18-54) and women (aged 18-49) in India and 29 states

Notes for figure 4: Adjusted for age, gender, marital status, religion, social caste, education, body mass index and place of residence.

**Figure 5** Mean body mass index across three possible responses for self-reported diabetes (Not known—diabetes status not known, No—do not have diabetes, Yes—have diabetes).

1  
2  
3  
4  
5  
6  
7  
8  
9  
10  
11  
12  
13  
14  
15  
16  
17  
18  
19  
20  
21  
22  
23  
24  
25  
26  
27  
28  
29  
30  
31  
32  
33  
34  
35  
36  
37  
38  
39  
40  
41  
42  
43  
44  
45  
46  
47  
48  
49  
50  
51  
52  
53  
54  
55  
56  
57  
58  
59  
60

Notes for figure 5: Vertical lines represent 95% confidence intervals. Body mass index (in kg/m<sup>2</sup>) ~~objectively defined based on~~ calculated from measured height and weight values. Horizontal line represents overall mean body mass index (21.2 kg/m<sup>2</sup>, SD 3.9).

Formatted: Underline

For peer review only

**SUPPLEMENTAL MATERIAL**

**Supplemental Table 1** Associations between socioeconomic status and self-reported diabetes in India from models restricted to male and female samples; 3<sup>rd</sup> National family health survey 2005-6

| Variable             | Men aged 18-54 |       |        |         |       |        | Women aged 18-49 |       |        |            |       |        |         |       |        |         |       |        |
|----------------------|----------------|-------|--------|---------|-------|--------|------------------|-------|--------|------------|-------|--------|---------|-------|--------|---------|-------|--------|
|                      | Models 1-3     |       |        | Model 4 |       |        | Model 5          |       |        | Models 1-3 |       |        | Model 4 |       |        | Model 5 |       |        |
|                      | O              | R     | 95% CI | O       | R     | 95% CI | O                | R     | 95% CI | O          | R     | 95% CI | O       | R     | 95% CI | O       | R     | 95% CI |
| Social Caste         | 1.0            |       |        | 1.0     |       |        | 1.0              |       |        | 1.0        |       |        | 1.0     |       |        | 1.0     |       |        |
| Other caste          | 0              |       |        | 0       |       |        | 0                |       |        | 0          |       |        | 0       |       |        | 0       |       |        |
| Scheduled caste      | 0.8            | (0.68 | 1.0    | 1.1     | (0.92 | 1.3    | 1.2              | (0.96 | 1.4    | 0.7        | (0.64 | 0.9    | 0.9     | (0.78 | 1.1    | 0.9     | (0.79 | 1.1    |
| Scheduled tribe      | 4              | -     | 3)     | 4       | -     | 9)     | 0                | -     | 8)     | 7          | -     | 3)     | 5       | -     | 4)     | 7       | -     | 6)     |
| Other backward caste | 0.5            | (0.40 | 0.7    | 0.7     | (0.52 | 1.0    | 0.7              | (0.56 | 1.0    | 0.5        | (0.39 | 0.7    | 0.6     | (0.48 | 0.8    | 0.6     | (0.48 | 0.8    |
| No caste             | 5              | -     | 5)     | 3       | -     | 0)     | 8                | -     | 7)     | 4          | -     | 1)     | 5       | -     | 7)     | 4       | -     | 7)     |
| Wealth               | 0.8            | (0.74 | 1.0    | 1.0     | (0.86 | 1.1    | 1.0              | (0.88 | 1.2    | 0.7        | (0.67 | 0.9    | 0.8     | (0.74 | 1.0    | 0.8     | (0.75 | 1.0    |
| Poorest              | 6              | -     | 0)     | 1       | -     | 9)     | 4                | -     | 3)     | 8          | -     | 1)     | 6       | -     | 1)     | 7       | -     | 2)     |
| 2nd quintile         | 0.9            | (0.62 | 1.3    | 0.9     | (0.65 | 1.4    | 1.0              | (0.71 | 1.5    | 0.8        | (0.66 | 1.1    | 0.9     | (0.68 | 1.2    | 0.9     | (0.67 | 1.2    |
| 3rd quintile         | 2              | -     | 7)     | 6       | -     | 0)     | 4                | -     | 2)     | 7          | -     | 6)     | 0       | -     | 1)     | 1       | -     | 2)     |
| 4th quintile         | 1.0            |       |        | 1.0     |       |        | 1.0              |       |        | 1.0        |       |        | 1.0     |       |        | 1.0     |       |        |
| Richest              | 0              |       |        | 0       |       |        | 0                |       |        | 0          |       |        | 0       |       |        | 0       |       |        |
| Education            | 1.4            | (0.97 | 2.1    | 1.3     | (0.94 | 1.9    | 1.3              | (0.89 | 1.8    | 1.7        | (1.17 | 2.4    | 1.6     | (1.15 | 2.4    | 1.6     | (1.18 | 2.5    |
| No education         | 0              | -     | 1)     | 5       | -     | 7)     | 2                | -     | 8)     | 2          | -     | 6)     | 6       | -     | 4)     | 9       | -     | 2)     |
| Primary              | 1.4            | (1.03 | 2.1    | 1.3     | (0.95 | 1.9    | 1.2              | (0.88 | 1.8    | 1.7        | (1.17 | 2.5    | 1.6     | (1.10 | 2.2    | 1.4     | (1.07 | 2.2    |
| Wealth               | 6              | -     | 5)     | 6       | -     | 6)     | 9                | -     | 0)     | 3          | -     | 2)     | 0       | -     | 6)     | 8       | -     | 5)     |
| 2nd quintile         | 2.1            | (1.51 | 3.1    | 1.8     | (1.34 | 2.6    | 1.6              | (1.14 | 2.2    | 2.6        | (1.79 | 3.8    | 2.3     | (1.64 | 3.3    | 1.8     | (1.38 | 2.8    |
| 3rd quintile         | 0              | -     | 0)     | 7       | -     | 2)     | 5                | -     | 8)     | 6          | -     | 7)     | 4       | -     | 2)     | 9       | -     | 3)     |
| 4th quintile         | 4.5            | (3.22 | 6.8    | 3.8     | (2.73 | 5.3    | 3.0              | (2.05 | 4.2    | 3.6        | (2.42 | 5.4    | 3.1     | (2.19 | 4.4    | 2.2     | (1.62 | 3.3    |
| Richest              | 5              | -     | 1)     | 2       | -     | 7)     | 4                | -     | 7)     | 7          | -     | 1)     | 6       | -     | 7)     | 4       | -     | 2)     |
| Education            | 1.0            |       |        | 1.0     |       |        | 1.0              |       |        | 1.0        |       |        | 1.0     |       |        | 1.0     |       |        |
| No education         | 0              |       |        | 0       |       |        | 0                |       |        | 0          |       |        | 0       |       |        | 0       |       |        |
| Primary              | 1.1            | (0.86 | 1.3    | 0.9     | (0.75 | 1.2    | 0.9              | (0.70 | 1.2    | 1.3        | (1.16 | 1.6    | 1.1     | (0.98 | 1.4    | 1.1     | (0.92 | 1.3    |

Formatted: Font: Bold  
 Formatted: Font: Bold  
 Formatted: Font: Bold

1  
2  
3  
4  
5  
6  
7  
8  
9  
10  
11  
12  
13  
14  
15  
16  
17  
18  
19  
20  
21  
22  
23  
24  
25  
26  
27  
28  
29  
30  
31  
32  
33  
34  
35  
36  
37  
38  
39  
40  
41  
42  
43  
44  
45  
46  
47  
48  
49

|                                      |     |       |     |     |       |     |     |       |     |     |       |     |     |       |     |     |       |     |
|--------------------------------------|-----|-------|-----|-----|-------|-----|-----|-------|-----|-----|-------|-----|-----|-------|-----|-----|-------|-----|
|                                      | 0   | -     | 8)  | 6   | -     | 1)  | 2   | -     | 0)  | 9   | -     | 7)  | 7   | -     | 0)  | 1   | -     | 3)  |
|                                      | 1.6 | (1.37 | 2.0 | 1.1 | (0.90 | 1.4 | 1.0 | (0.85 | 1.3 | 1.7 | (1.52 | 2.0 | 1.2 | (1.08 | 1.5 | 1.2 | (1.02 | 1.4 |
| Secondary                            | 6   | -     | 1)  | 3   | -     | 4)  | 7   | -     | 6)  | 6   | -     | 2)  | 8   | -     | 0)  | 1   | -     | 3)  |
|                                      | 2.3 | (1.87 | 2.9 | 1.2 | (0.98 | 1.7 | 1.1 | (0.86 | 1.4 | 1.4 | (1.12 | 1.7 | 0.9 | (0.72 | 1.1 | 0.8 | (0.66 | 1.0 |
| Higher                               | 6   | -     | 2)  | 7   | -     | 0)  | 3   | -     | 8)  | 0   | -     | 3)  | 1   | -     | 5)  | 5   | -     | 8)  |
| Body mass index (kg/m <sup>2</sup> ) |     |       |     |     |       |     |     |       |     |     |       |     |     |       |     |     |       |     |
| <18                                  |     |       |     |     |       |     | 1.0 |       |     |     |       |     | 1.0 |       |     |     |       |     |
|                                      |     |       |     |     |       |     | 0   |       |     |     |       |     | 0   |       |     |     |       |     |
|                                      |     |       |     |     |       |     | 1.2 | (0.99 | 1.5 |     |       |     | 1.2 | (1.01 | 1.5 |     |       |     |
| 18.5-22.9                            |     |       |     |     |       |     | 5   | -     | 5)  |     |       |     | 4   | -     | 3)  |     |       |     |
|                                      |     |       |     |     |       |     | 2.0 | (1.59 | 2.5 |     |       |     | 2.1 | (1.75 | 2.6 |     |       |     |
| 23-27.4                              |     |       |     |     |       |     | 0   | -     | 0)  |     |       |     | 2   | -     | 8)  |     |       |     |
|                                      |     |       |     |     |       |     | 2.1 | (1.65 | 2.8 |     |       |     | 3.5 | (2.89 | 4.5 |     |       |     |
| 27.5+                                |     |       |     |     |       |     | 5   | -     | 6)  |     |       |     | 8   | -     | 6)  |     |       |     |

Notes: OR odds ratio; In models 1-3 one SES marker (social caste, household wealth, education) was modelled at a time while adjusting for age, gender, religion, and place of residence. In model 4, all SES markers were included along with covariates form models 1-3. In model 5, BMI was included with markers of SES and covariates from model 4.

Formatted: Font: 10 pt



**Supplemental Table 2** Odds ratio (OR) for self-reported diabetes for a one-quintile increase in household wealth for men (aged 18-54) and women (aged 18-49) in India and 29 states

| State             | n       | Self-reported diabetes |               |
|-------------------|---------|------------------------|---------------|
|                   |         | Wealth OR              | 95% CI*       |
| India             | 158,936 | 1.31                   | (1.20 - 1.42) |
| Jammu and Kashmir | 3,383   | 1.55                   | (1.21 - 1.98) |
| Maharashtra       | 14,053  | 1.51                   | (1.27 - 1.78) |
| Orissa            | 4,838   | 1.50                   | (1.24 - 1.81) |
| Arunachal Pradesh | 1,798   | 1.49                   | (1.14 - 1.94) |
| Uttar Pradesh     | 17,555  | 1.47                   | (1.28 - 1.70) |
| Sikkim            | 2,406   | 1.46                   | (1.11 - 1.92) |
| Madhya Pradesh    | 7,756   | 1.43                   | (1.19 - 1.71) |
| Assam             | 3,904   | 1.43                   | (1.15 - 1.77) |
| Uttaranchal       | 3,120   | 1.42                   | (1.12 - 1.81) |
| Punjab            | 4,134   | 1.41                   | (1.10 - 1.81) |
| Mizoram           | 2,089   | 1.40                   | (1.07 - 1.85) |
| Karnataka         | 9,049   | 1.40                   | (1.19 - 1.64) |
| Chhattisgarh      | 4,246   | 1.36                   | (1.14 - 1.64) |
| Delhi             | 3,026   | 1.35                   | (1.05 - 1.73) |
| Rajasthan         | 4,433   | 1.33                   | (1.03 - 1.71) |
| Meghalaya         | 2,135   | 1.29                   | (1.03 - 1.63) |
| Jharkhand         | 3,044   | 1.29                   | (1.06 - 1.57) |
| Tamil Nadu        | 10,106  | 1.28                   | (1.11 - 1.48) |
| Andhra Pradesh    | 11,824  | 1.25                   | (1.09 - 1.45) |
| Himachal Pradesh  | 3,563   | 1.25                   | (0.97 - 1.61) |
| Gujarat           | 4,322   | 1.25                   | (1.00 - 1.56) |
| Goa               | 3,883   | 1.20                   | (0.98 - 1.48) |
| Nagaland          | 6,350   | 1.19                   | (0.99 - 1.44) |
| Tripura           | 2,089   | 1.18                   | (0.96 - 1.45) |
| Manipur           | 6,941   | 1.14                   | (0.95 - 1.37) |
| Haryana           | 3,173   | 1.11                   | (0.90 - 1.38) |
| Bihar             | 3,882   | 1.10                   | (0.93 - 1.30) |
| Kerala            | 4,018   | 1.10                   | (0.89 - 1.35) |
| West Bengal       | 7,816   | 0.95                   | (0.83 - 1.09) |

Notes: Odds ratios (OR) and 95% credible intervals (CI) adjusted for age, gender, marital status, religion, social caste, education, body mass index and place of residence.

**Supplemental Table 13** Associations between socioeconomic status and body mass index, for self-reported diabetics and those with es, and unknown diabetes status compared to self-reported non-diabetics using a multilevel multinomial regression model.

| Variable               | <u>Diabetes Self-reported diabetes</u> |               | <u>Diabetes not known Unknown diabetes status</u> |               |
|------------------------|----------------------------------------|---------------|---------------------------------------------------|---------------|
|                        | Odds ratio                             | 95% CI*       | Odds ratio                                        | 95% CI        |
| <b>Social Caste</b>    |                                        |               |                                                   |               |
| Other caste            | 1.00                                   |               | 1.00                                              |               |
| Scheduled caste        | 1.07                                   | (0.93 - 1.24) | 1.13                                              | (0.96 - 1.31) |
| Scheduled tribe        | 0.73                                   | (0.58 - 0.91) | 1.52                                              | (1.25 - 1.84) |
| Other backward caste   | 0.96                                   | (0.86 - 1.08) | 1.07                                              | (0.93 - 1.23) |
| No caste               | 0.95                                   | (0.75 - 1.18) | 0.76                                              | (0.58 - 0.99) |
| <b>Wealth</b>          |                                        |               |                                                   |               |
| Poorest                | 1.00                                   |               | 1.00                                              |               |
| 2nd quintile           | 1.51                                   | (1.14 - 2.03) | 0.90                                              | (0.77 - 1.05) |
| 3rd quintile           | 1.41                                   | (1.07 - 1.89) | 0.86                                              | (0.73 - 1.01) |
| 4th quintile           | 1.82                                   | (1.38 - 2.44) | 0.82                                              | (0.68 - 0.98) |
| Richest                | 2.63                                   | (1.97 - 3.56) | 0.64                                              | (0.51 - 0.79) |
| <b>Education</b>       |                                        |               |                                                   |               |
| No education           | 1.00                                   |               | 1.00                                              |               |
| Primary                | 1.00                                   | (0.87 - 1.17) | 0.86                                              | (0.76 - 0.99) |
| Secondary              | 1.12                                   | (0.98 - 1.28) | 0.71                                              | (0.63 - 0.81) |
| Higher                 | 1.01                                   | (0.85 - 1.21) | 0.45                                              | (0.36 - 0.57) |
| <b>Body mass index</b> |                                        |               |                                                   |               |
| <18.5                  | 1.00                                   |               | 1.00                                              |               |
| 18.5-22.93             | 1.26                                   | (1.08 - 1.46) | 1.03                                              | (0.93 - 1.15) |
| 23-27.45               | 2.09                                   | (1.79 - 2.45) | 1.17                                              | (1.01 - 1.36) |
| 27.5+                  | 2.99                                   | (2.52 - 3.55) | 1.33                                              | (1.06 - 1.66) |

Notes: model adjusted for age, gender, religion, marital status, place of residence  
\*95% credible interval

Formatted: Line spacing: single

109,041 households (198,754 adults)  
in NFHS (74,369 men; 124,385 women)

21,940 (11.0%) individuals aged <18;  
5,670 (4.5%) pregnant women

171,207 (86.1%) individuals  
eligible for main analyses

168,135 (98.2%) individuals  
in main analyses

2,373 (1.4%) unknown  
diabetes status\*;  
699 (0.4%) missing covariates

65,255 (38.8%) men  
aged 18-54

102,880 (62.2%) women  
aged 18-49

158,936 (94.5%) individuals  
with data on BMI\*\*

60,691 (38.2%)  
men

98,245 (61.8%)  
women

1  
2  
3  
4  
5  
6  
7  
8  
9  
10  
11  
12  
13  
14  
15  
16  
17  
18  
19  
20  
21  
22  
23  
24  
25  
26  
27

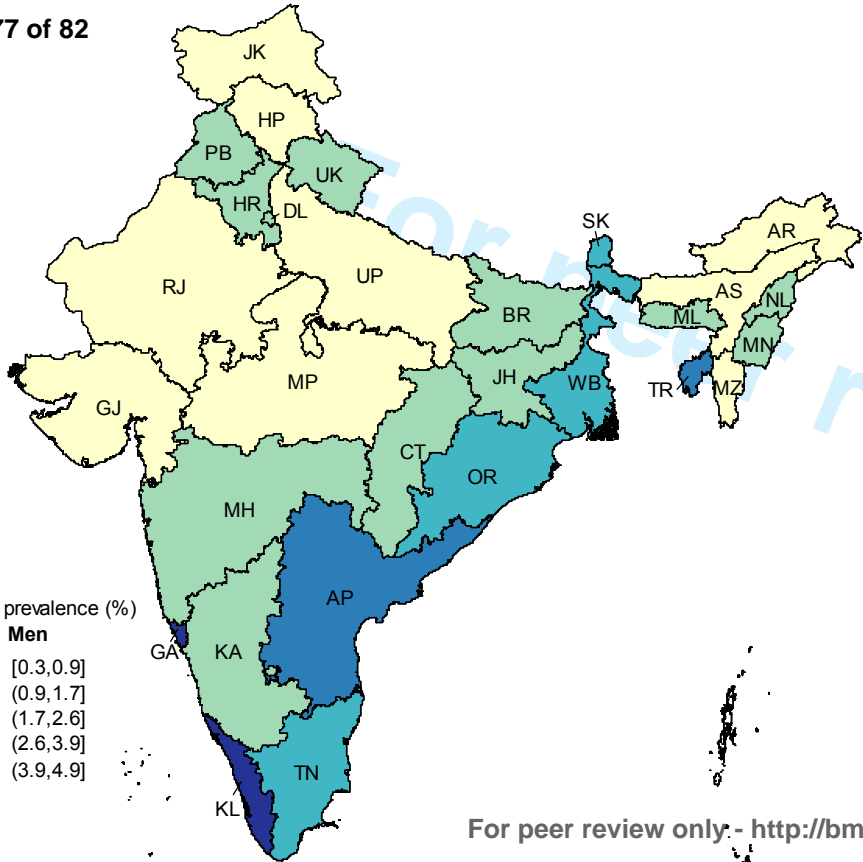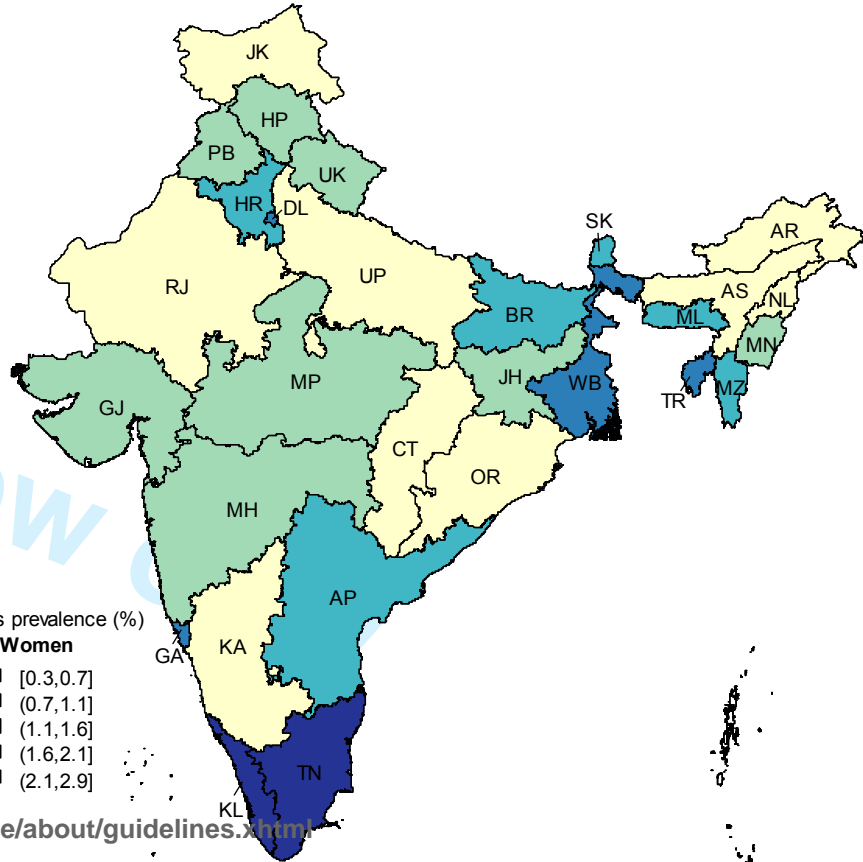

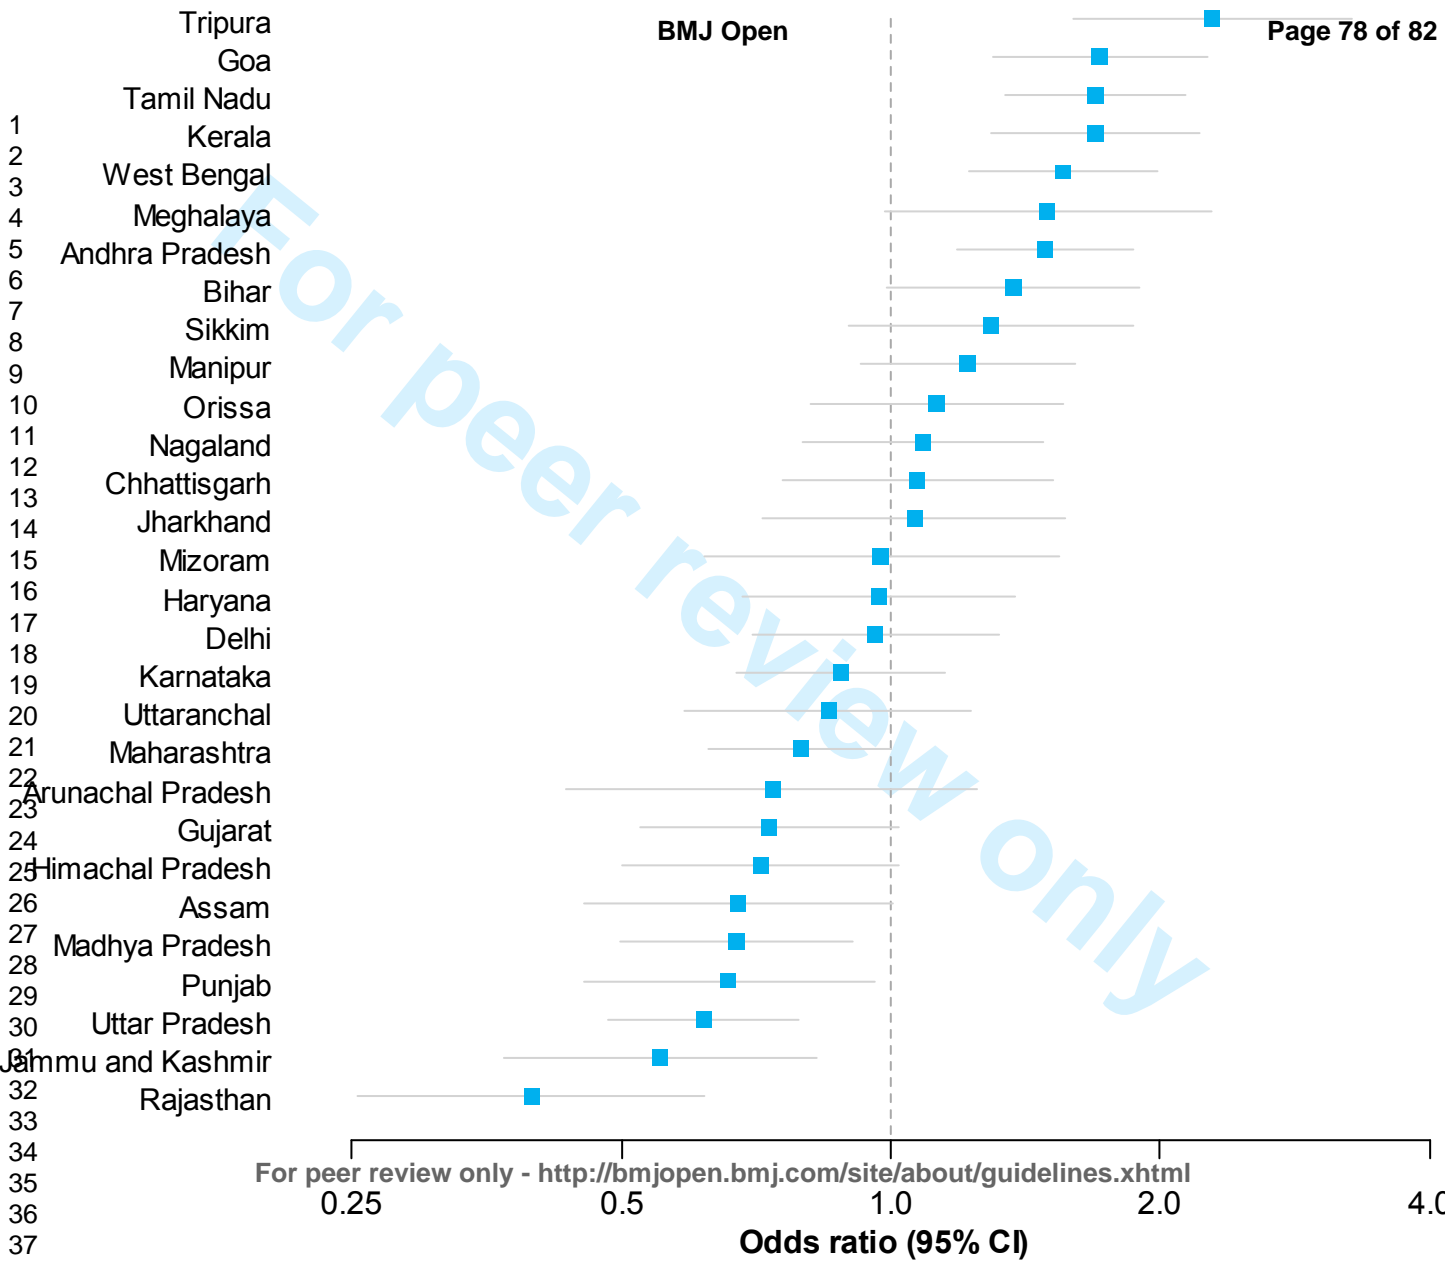

1  
2  
3  
4  
5  
6  
7  
8  
9  
10  
11  
12  
13  
14  
15  
16  
17  
18  
19  
20  
21  
22  
23  
24  
25  
26  
27  
28  
29  
30  
31  
32  
33  
34  
35  
36  
37

Overall association (OR=1.31)

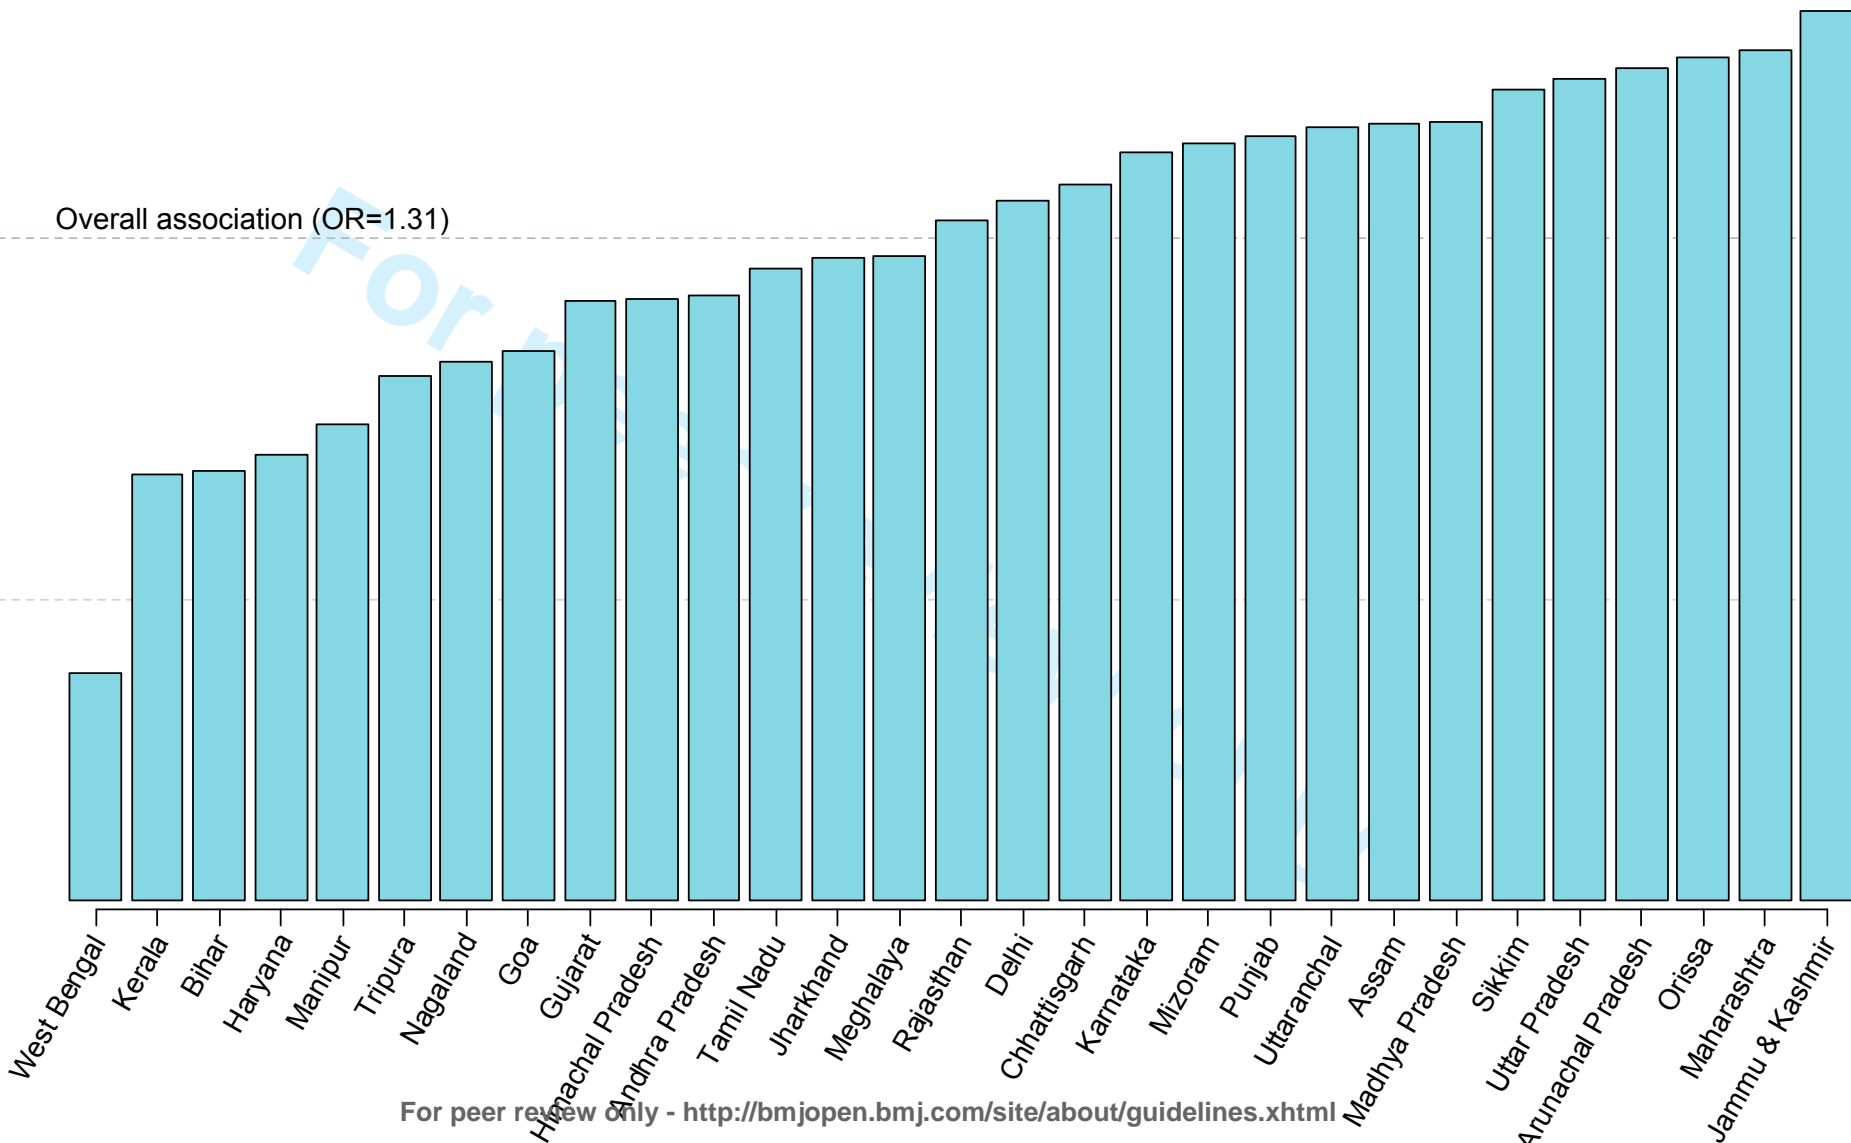

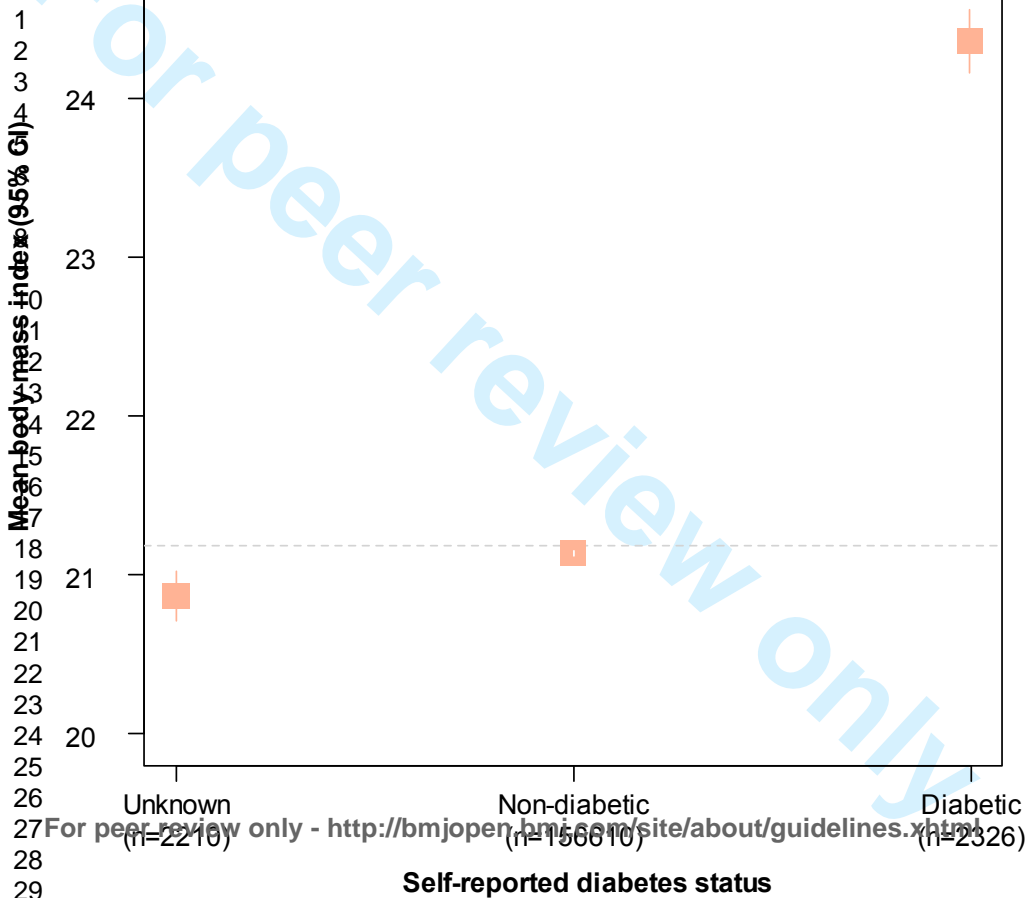

STROBE Statement—Checklist of items that should be included in reports of *cross-sectional studies*

**Article: Association between socioeconomic status and diabetes in India**

**Authors: Daniel J Corsi, SV Subramanian**

|                              | Item No | Recommendation                                                                                                                                                                                                                                                                                                                                                                              |
|------------------------------|---------|---------------------------------------------------------------------------------------------------------------------------------------------------------------------------------------------------------------------------------------------------------------------------------------------------------------------------------------------------------------------------------------------|
| <b>Title and abstract</b>    | 1       | (a) Design cross-sectional study, listed in abstract<br>(b) abstract and article summary (page 3)                                                                                                                                                                                                                                                                                           |
| <b>Introduction</b>          |         |                                                                                                                                                                                                                                                                                                                                                                                             |
| Background/rationale         | 2       | Explain the scientific background and rationale for the investigation being reported, (abstract, page 3, page 4-5)                                                                                                                                                                                                                                                                          |
| Objectives                   | 3       | State specific objectives, including any prespecified hypotheses (abstract, page 3, page 4-5)                                                                                                                                                                                                                                                                                               |
| <b>Methods</b>               |         |                                                                                                                                                                                                                                                                                                                                                                                             |
| Study design                 | 4       | Present key elements of study design early in the paper (abstract, page 6)                                                                                                                                                                                                                                                                                                                  |
| Setting                      | 5       | Describe the setting, locations, and relevant dates, including periods of recruitment, exposure, follow-up, and data collection (abstract, page 5-7)                                                                                                                                                                                                                                        |
| Participants                 | 6       | (a) Give the eligibility criteria, and the sources and methods of selection of participants (page 6)                                                                                                                                                                                                                                                                                        |
| Variables                    | 7       | Clearly define all outcomes, exposures, predictors, potential confounders, and effect modifiers. Give diagnostic criteria, if applicable (page 7)                                                                                                                                                                                                                                           |
| Data sources/<br>measurement | 8*      | For each variable of interest, give sources of data and details of methods of assessment (measurement). Describe comparability of assessment methods if there is more than one group (page 7-8)                                                                                                                                                                                             |
| Bias                         | 9       | Describe any efforts to address potential sources of bias (page 8-9; page 12)                                                                                                                                                                                                                                                                                                               |
| Study size                   | 10      | Explain how the study size was arrived at (page 7)                                                                                                                                                                                                                                                                                                                                          |
| Quantitative<br>variables    | 11      | Explain how quantitative variables were handled in the analyses. If applicable, describe which groupings were chosen and why (page 8)                                                                                                                                                                                                                                                       |
| Statistical methods          | 12      | (a) Describe all statistical methods, including those used to control for confounding (page 8-9)<br>(b) Describe any methods used to examine subgroups and interactions (page 12)<br>(c) Explain how missing data were addressed (page 7)<br>(d) If applicable, describe analytical methods taking account of sampling strategy (page 8)<br>(e) Describe any sensitivity analyses (page 12) |
| <b>Results</b>               |         |                                                                                                                                                                                                                                                                                                                                                                                             |
| Participants                 | 13      | (a) Report numbers of individuals at each stage of study—eg numbers potentially eligible, examined for eligibility, confirmed eligible, included in the study, completing follow-up, and analysed (page 8)<br>(b) Give reasons for non-participation at each stage (n/a)<br>(c) Consider use of a flow diagram (n/a)                                                                        |
| Descriptive data             | 14*     | (a) Give characteristics of study participants (eg demographic, clinical, social) and information on exposures and potential confounders (page 9-10, table 1)<br>(b) Indicate number of participants with missing data for each variable of interest (page 7; page 12)                                                                                                                      |
| Outcome data                 | 15*     | Table 1                                                                                                                                                                                                                                                                                                                                                                                     |
| Main results                 | 16DJC   | (a) Tables 1 (unadjusted), 2 (age, gender, marital status, religion, place of residence adjusted; and fully adjusted model)                                                                                                                                                                                                                                                                 |



|                          |    |                                                                                                                                                                                      |
|--------------------------|----|--------------------------------------------------------------------------------------------------------------------------------------------------------------------------------------|
|                          |    | (b) Report category boundaries when continuous variables were categorized (in methods, e.g. for BMI)                                                                                 |
|                          |    | (c) If relevant, consider translating estimates of relative risk into absolute risk for a meaningful time period (n/a)                                                               |
| Other analyses           | 17 | Report other analyses done—eg analyses of subgroups and interactions, and sensitivity analyses (Page 12)                                                                             |
| <b>Discussion</b>        |    |                                                                                                                                                                                      |
| Key results              | 18 | Summarise key results with reference to study objectives (page 13)                                                                                                                   |
| Limitations              | 19 | Discuss limitations of the study, taking into account sources of potential bias or imprecision. Discuss both direction and magnitude of any potential bias (page 13)                 |
| Interpretation           | 20 | Give a cautious overall interpretation of results considering objectives, limitations, multiplicity of analyses, results from similar studies, and other relevant evidence (page 16) |
| Generalisability         | 21 | Discuss the generalisability (external validity) of the study results (pages 14-15)                                                                                                  |
| <b>Other information</b> |    |                                                                                                                                                                                      |
| Funding                  | 22 | Give the source of funding and the role of the funders for the present study and, if applicable, for the original study on which the present article is based (title page)           |

\*Give information separately for exposed and unexposed groups.

**Note:** An Explanation and Elaboration article discusses each checklist item and gives methodological background and published examples of transparent reporting. The STROBE checklist is best used in conjunction with this article (freely available on the Web sites of PLoS Medicine at <http://www.plosmedicine.org/>, Annals of Internal Medicine at <http://www.annals.org/>, and Epidemiology at <http://www.epidem.com/>). Information on the STROBE Initiative is available at [www.strobe-statement.org](http://www.strobe-statement.org).
